# Supplementary material for: Continuation rates of oral hormonal contraceptives in a cohort of first-time users: a population-based registry study, Sweden 2005–2010
Source: PubMed Central journal article supplement — BMJ Open. 2013 Oct 18;3(10):e003401. doi: 10.1136/bmjopen-2013-003401 (PMC3808784; doi:10.1136/bmjopen-2013-003401), 2013-10-18
Supplement: bmjopen-2013-003401.draft_revisions.pdf [file bmjopen-2013-003401.draft_revisions.pdf]

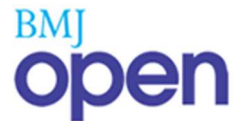

**Patterns of adherence to oral hormonal contraceptives in a cohort of first time users: a population based registry study, Sweden 2005-2010**

|                                 |                                                                                                                                                                                                                                                                                                                                                                                                                                                                                                                             |
|---------------------------------|-----------------------------------------------------------------------------------------------------------------------------------------------------------------------------------------------------------------------------------------------------------------------------------------------------------------------------------------------------------------------------------------------------------------------------------------------------------------------------------------------------------------------------|
| Journal:                        | <i>BMJ Open</i>                                                                                                                                                                                                                                                                                                                                                                                                                                                                                                             |
| Manuscript ID:                  | bmjopen-2013-003401                                                                                                                                                                                                                                                                                                                                                                                                                                                                                                         |
| Article Type:                   | Research                                                                                                                                                                                                                                                                                                                                                                                                                                                                                                                    |
| Date Submitted by the Author:   | 13-Jun-2013                                                                                                                                                                                                                                                                                                                                                                                                                                                                                                                 |
| Complete List of Authors:       | Josefsson, Dr Ann; Faculty of Health Sciences , Division of obstetrics&gynaecology, Dep. Clinical and Experimental Medicine<br>Wiréhn, Ann-Britt; Faculty of Health Sciences, Div Obstetrics& Gynaecology, Dep. Clinical and Experimental Sciences<br>Lindberg, Malou; Faculty of Health Sciences, Department of Medical and Health Sciences, Primary Care<br>Foldemo, Annika; Department of Medical and Health Sciences,<br>Brynhildsen, Jan; Obstetrics and Gynaecology, Department of Clinical and Experimental medicine |
| <b>Primary Subject Heading</b>: | Obstetrics and gynaecology                                                                                                                                                                                                                                                                                                                                                                                                                                                                                                  |
| Secondary Subject Heading:      | Reproductive medicine, Obstetrics and gynaecology                                                                                                                                                                                                                                                                                                                                                                                                                                                                           |
| Keywords:                       | Reproductive medicine < GYNAECOLOGY, PUBLIC HEALTH, Community gynaecology < GYNAECOLOGY                                                                                                                                                                                                                                                                                                                                                                                                                                     |
|                                 |                                                                                                                                                                                                                                                                                                                                                                                                                                                                                                                             |

SCHOLARONE™  
Manuscripts

only

1  
2  
3 **Patterns of adherence to oral hormonal contraceptives in a cohort of first**  
4 **time users: a population based registry study, Sweden 2005-2010**  
5  
6

7 Ann Josefsson *Associate Professor, senior consultant*<sup>1</sup>, Ann-Britt Wiréhn *PhD, statistician*<sup>1,2</sup>  
8

9 Malou Lindberg *Associate Professor*<sup>2,3</sup>, Anniqa Foldemo *PhD*<sup>2,4</sup>, Jan Brynhildsen *Associate*  
10 *Professor, senior consultant*<sup>1</sup>  
11

12 <sup>1</sup> Obstetrics and Gynaecology, Department of Clinical and Experimental Medicine, Faculty of  
13 Health Sciences, Linköping University, Department of Obstetrics and Gynaecology in  
14 Linköping, County Council of Östergötland, Linköping, Sweden  
15

16 <sup>2</sup>Local Health Care Research and Development Unit, County Council in Östergötland,  
17 Linköping, Sweden  
18

19 <sup>3</sup>Department of Medical and Health Sciences, Primary Care, Linköping University,  
20 Linköping, Sweden  
21

22 <sup>4</sup>Department of Medical and Health Sciences, Faculty of Health Sciences, Linköping  
23 University, Linköping, Sweden  
24  
25

26  
27  
28  
29  
30  
31  
32 Correspondence to:

33 Ann Josefsson, Division of Obstetrics and Gynaecology,  
34 Linköping University, Faculty of Health Sciences,  
35 University Hospital,  
36 SE-58185, Linköping, Sweden  
37

38 [ann.josefsson@lio.se](mailto:ann.josefsson@lio.se)  
39

40 [Tel: +46 10 1030000](tel:+46101030000)  
41

42 [Fax: +46 13 14 81 56](tel:+4613148156)  
43  
44  
45  
46  
47

48  
49  
50 The Corresponding Author has the right to grant on behalf of all authors and does grant on  
51 behalf of all authors, an exclusive licence on a worldwide basis to the BMJ Publishing Group  
52 Ltd to permit this article (if accepted) to be published in BMJ editions and any other  
53 BMJ PGL products and sublicences such use and exploit all subsidiary rights, as set out in our  
54  
55  
56  
57  
58  
59  
60

1  
2  
3 licence.

4 Short Title: Adherence to oral hormonal contraceptives

5  
6 **Key words:** Hormonal contraceptives; Oral contraceptives; Patient adherence; Registries;  
7 Follow-up studies  
8  
9

10  
11 **Word count:** 2476  
12  
13  
14  
15  
16  
17  
18  
19  
20  
21  
22  
23  
24  
25  
26  
27  
28  
29  
30  
31  
32  
33  
34  
35  
36  
37  
38  
39  
40  
41  
42  
43  
44  
45  
46  
47  
48  
49  
50  
51  
52  
53  
54  
55  
56  
57  
58  
59  
60

For peer review only

**ABSTRACT**

**Objective** To investigate if continuation rates in first-time users of oral hormonal contraceptives differed between different formulations. To measure if rates were related to prescribing categories, i.e. physicians and midwives.

**Design** A longitudinal national population-based registry study

**Setting** The Swedish prescribed drug register

**Participants** All females born 1977-1994 defined as first-time users of hormonal contraceptives from 2007 to 2009 (n = 226 211).

**Main outcome measures** Tendency to switch type of hormonal contraceptive within 6 months use and repeated dispensation identical to the first, Physicians' and midwives' prescription patterns. **Results** In Sweden, 782 375 women were born 1977-1994 at the time of the study. 226 211 women were identified as first-time users of hormonal contraceptives. Ethinylestradiol + levonorgestrel, desogestrel-only and ethinylestradiol + drospirenone were the hormonal contraceptives most commonly dispensed for first-time users, 43.3 %, 24.4 % and 11.1 %, respectively. The overall rate of switching contraceptive type in the first six months was 11.3%, highest for desogestrel-only (14.3%) and lowest for ethinylestradiol + drospirenone (6.6 %). group. Having a repeated dispensation identical to the initial was highest for users of ethinylestradiol either combined with levonorgestrel or drospirenone, 81.4% and 81.2% respectively, whereas this rate for the initial desogestrel-only users was 71.5%. The RR of switching of contraceptive type within the first six months was 1.35 (95% CI: 1.32-1.39) for desogestrel-only and 0.63 (0.59-0.66) for ethinylestradiol + drospirenone compared to ethinylestradiol + levonorgestrel. The physicians' and midwives' prescription patterns concerning the women's continuation rates differed only slightly.

**Conclusion** Desogestrel-only users conferred the highest switcher rate to another hormonal contraceptive within a 6-months period. Users of ethinylestradiol + levonorgestrel were more prone to switch to another product within six months than women using ethinylestradiol + drospirenone. These findings may be of clinical importance when tailoring hormonal contraceptives on an individual basis.

## ARTICLE SUMMARY

### Article focus

- Compliance and adherence to contraceptives is of utmost importance to avoid unintended pregnancies
- In Sweden, a change in prescription pattern has been observed, from combined oral contraceptives to progestin-only-pills, most probably due to media alarm
- Do adherence to treatment differ between POPs and different formulations of combined oral contraceptives?

### Key messages

- Users of progestin-only pills more frequently choose another hormonal contraceptive method, or discontinue use within six months, than users of combined oral contraceptives
- Users of drospirenone containing combined oral contraceptives were the least likely to switch method

### Strengths and limitations of this study

- The Swedish Prescribed Drug Register covers all drugs dispensed from all Swedish pharmacies since July 2005. Since sale information is transferred directly from the cashier to the register, data is complete and results in a high external validity for the register
- The large amount of data gives a high precision to the point estimates.
- We have not been able to control for discontinuation due to a wish to become pregnant.

## INTRODUCTION

Compliance and continuation of contraceptive use is crucial in the efforts to avoid unwanted pregnancies. Oral contraceptive (OC) use is however; generally characterized by poor compliance, low adherence and relatively high discontinuation rates (1). Reasons for poor adherence and discontinuation have been reported to be side effects but also the fear of side effects. Reported side effects include mood disturbances, decrease in libido, weight gain and poor bleeding control and the fear also includes the risk of venous thromboembolism (2, 3). Most of these reported side effects can be attributed to the progestogen component of the pill. Consequently, new progestogens with a potential of a more beneficial profile concerning side effects have been developed. Despite these improvements, discontinuation rates are still high.

A huge mass of studies has been performed, but there is only sparse evidence of differences in continuation rates between different types of hormonal contraceptives. Type of progestogen (4, 5), number of oral contraceptive pill packages dispensed (6), prescription drug or over the counter (7) have all been proposed as determinants for continuation. Moreover, improvements of the formulations of combined hormonal contraceptives (COC) have been made in order to increase adherence. Such improvements include new routes of administration and different regimens, i.e. mono-, bi-, tri-, and four -phasic pills, patches and vaginal rings (8, 9). So far, there is only limited evidence that use of a specific formulation or route of administration, would be a better choice concerning continuation rates (4-9).

In several Cochrane reviews the authors have concluded that most studies are hampered either by design or by involvement of pharmaceutical companies and the results must therefore be interpreted with caution (4,5,10). Actually, there is still a great need for studies emphasizing continuation/discontinuation and risks of poor compliance and as a consequence a risk of unintended pregnancies.

In Sweden, most contraceptives are prescribed by midwives. COC, progestin-only pills, implants, progestin-injectable (Depo-Provera<sup>®</sup>), hormonal-intruterine-system (Mirena<sup>®</sup>) but no combined hormonal injectable are available.

The prescription pattern in Sweden somewhat differs from most other countries as desogestrel-only pills have a very high market share and is the most commonly prescribed hormonal contraceptive. This is most probably an effect of media alarm and very cautious recommendations by the Swedish Medical Products Agency. Poor bleeding control is,

1  
2  
3 however, more common during POP-use and has been reported to be a common cause of  
4 discontinuation (2).  
5  
6  
7

8  
9 We hypothesised that switching product within six months is more common among  
10 desogestrel-only users compared to users of ethinylestradiol + levonorgestrel and that users of  
11 ethinylestradiol + drospirenonone are least prone to switch product within six months. The  
12 aim of the present study was to investigate if continuation rates in terms of repeated dispensed  
13 packages of the initially prescribed hormonal contraceptives differed between different  
14 formulations in a whole population. Secondly to measure if rates were related to prescribing  
15 categories, i.e. physicians and midwives.  
16  
17  
18  
19  
20  
21  
22  
23  
24  
25  
26  
27  
28  
29  
30  
31  
32  
33  
34  
35  
36  
37  
38  
39  
40  
41  
42  
43  
44  
45  
46  
47  
48  
49  
50  
51  
52  
53  
54  
55  
56  
57  
58  
59  
60

## METHODS

In this study, women identified as first-time users of hormonal contraceptives were treated as a cohort and followed for six months. Information on all women's prescribed and dispensed hormonal contraceptives from July 2005 to December 2010 was collected from the Swedish Prescribed Drug Register (11). The inclusion criteria for data extraction were: female born 1977-1994 with at least one dispensation of hormonal contraceptives at least once during the 5.5 year-period. The study population consisted of women without any dispensed hormonal contraceptive therapy in the 18 months between July 2005 - December 2006 but who had received at least one dispensation between January 2007-December 2009. This group was thus considered to be first-time users and constituted the study cohort in this study. Data from 2010 was used to identify those who had switched to a drug other than the first-dispensed drug after 2009 as well as those who had a second dispensation for the drug originally prescribed. Thus, 5.5 years data was used in this study.

The Swedish Prescribed Drug Register covers all drugs prescribed and dispensed for the entire Swedish population from June 2005 to the present. From this database we have obtained data on drugs having the Anatomical therapeutic chemical codes G03AA or G033AB (combined hormonal contraceptives) and G03AC (progestin only), from July 2005 to December 2010. We organized data by type for the three most common drugs, here referred to by their generic names: 1) ethinylestradiol + levonorgestrel, 2) ethinylestradiol + drospirenone and 3) desogestrel-only. The remaining hormonal contraceptives were placed in two other groups. The first, "Other oral contraceptives", included ethinylestradiol combined with either lynestrenol, norgestimat or desogestrel, and the progestin-only drugs norethisterone and lynestrenol). The second, "Other galenic forms", included intrauterine systems, transdermal patches, implants and injections. Although the correct designation for data from the Swedish Prescribed Drug Register is, "prescribed and dispensed" drugs, from now on the term used in this paper will be "dispensed" drugs.

### Statistical analysis

The number of women who received an initial hormonal contraceptive drug during the three-year period January 2007 - December 2009 is presented by drug type and age. The population was divided into four age groups: 16-19, 20-24, 25-28 and 16-28 years. The usage patterns are presented as numbers, percentages of total dispensations per product type and age group. Relative risks (RR) of either changing drug use or being prescribed the same drug were calculated together with 95% confidence intervals for each group of oral contraceptives, with



1  
2  
3 ethinylestradiol + levonorgestrel as the reference category. The CI tails were obtained using  
4 the normal distribution approximation and delta method to derive standard errors (12). Those  
5 who initially used long-acting contraceptive methods (intrauterine systems, implants and  
6 injections) were not included in the risk analysis since the results would not be relevant given  
7 the length of the period of data inclusion in this study.  
8  
9

10  
11 As the majority of hormonal contraceptives in Sweden are prescribed by midwives, the usage  
12 pattern is also described in relation to prescribers, physician or midwife. Measures carried out  
13 divided on prescriber categories were the prescription distribution in percent within each  
14 prescriber category, and within each product type. The percentages of first-time users who  
15 switched to a new drug within 6 months of receiving the first and of those who continued to  
16 use the first drug are presented in relation to prescriber category.  
17  
18  
19  
20  
21  
22  
23  
24  
25  
26  
27  
28  
29  
30  
31  
32  
33  
34  
35  
36  
37  
38  
39  
40  
41  
42  
43  
44  
45  
46  
47  
48  
49  
50  
51  
52  
53  
54  
55  
56  
57  
58  
59  
60

## RESULTS

The Swedish census data 2010 showed that there were 782 375 women born between 1977 and 1994. The number of women who had used hormonal contraceptives at least once between July 2005 and December 2010 was 578 009 (~74%). After excluding those women who had a dispensation of OC during the first 18 months of the period, 226 211 were considered to be first-time users and were thus included in the statistical analyses.

The dispensation pattern for first-time users was: ethinylestradiol + levonorgestrel (43.3%), desogestrel-only (24.4%), and ethinylestradiol + drospirenone (11.1%) (Table 1). The percentage of first-time users who switched to a different drug before six months had elapsed was 11.3%. The rate was highest for desogestrel-only (14.3%) and lowest for ethinylestradiol + drospirenone (6.6 %). The group for whom a different drug was most often dispensed consisted of those 16-19 years of age and this was true for all three drugs. The 25-28 years of age group showed the lowest rate of change. The continuation rate, i.e. having a repeated dispensation identical to the initial, was highest for ethinylestradiol + levonorgestrel (81.4%) and ethinylestradiol + drospirenone (81.2%). The continuation rate for desogestrel-only was lower (71.5%). The rate of change decreased with age. The RR of switching to a different contraceptive within the first six months was 1.35 (95% CI: 1.32-1.39) for desogestrel-only and 0.63 (0.59-0.66) for ethinylestradiol + drospirenone where ethinylestradiol + levonorgestrel was used as the reference category. Hence, women using ethinylestradiol + drospirenone had the lowest RR for changing to a different type of hormonal contraceptive while those using desogestrel-only had the highest. Further, comparisons between the three formulations show that desogestrel-only users not only had the highest RR for changing to a different type of hormonal contraceptive but also the lowest RR for having a second dispensation identical to the first. The RR did neither vary by age group for changing the type of hormonal contraceptive during the first 6 months nor for having a repeated dispensation identical to first.

The physicians and midwives displayed essentially the same pattern of prescribing the second prescription for first-time users. It is, however, worth noting that midwives prescribed the drug ethinylestradiol + drospirenone less often than physicians did. This drug was ranked as the fifth alternative choice for midwives and as the second alternative choice for physicians (in our five chosen groupings of hormonal contraceptives) (Table 2).

Table 1. Continuation rates in first time users of hormonal contraceptives in Sweden 2007-2009.

| Product type                       | Initial prescription and dispensation |        |            | Switching type before 6 months use |                    |               | Second prescription and dispensation identical to first |                     |                    |               |             |
|------------------------------------|---------------------------------------|--------|------------|------------------------------------|--------------------|---------------|---------------------------------------------------------|---------------------|--------------------|---------------|-------------|
|                                    | Age                                   | n      | % of total | n                                  | % per product type | Relative risk | (95% CI)                                                | n                   | % per product type | Relative risk | (95% CI)    |
| Ethinylestradiol + Levonorgestrel  | 16-19                                 | 73197  |            | 8234                               | 11.2               | 1 (reference) | (reference)                                             | 60945               | 83.3               | 1 (reference) | (reference) |
|                                    | 20-24                                 | 17140  |            | 1613                               | 9.4                |               |                                                         | 13158               | 76.8               |               |             |
|                                    | 25-28                                 | 7724   |            | 529                                | 6.8                |               |                                                         | 5692                | 73.7               |               |             |
|                                    | 16-28                                 | 98061  | 43.3       | 10376                              | 10.6               |               |                                                         | 79795               | 81.4               |               |             |
| Ethinylestradiol + Drospirenone    | 16-19                                 | 11604  |            | 952                                | 8.2                | 0.73          | (0.68-0.78)                                             | 9845                | 84.8               | 1.02          | (1.01-1.03) |
|                                    | 20-24                                 | 7889   |            | 433                                | 5.5                | 0.58          | (0.53-0.65)                                             | 6261                | 79.4               | 1.03          | (1.02-1.05) |
|                                    | 25-28                                 | 5655   |            | 279                                | 4.9                | 0.72          | (0.63-0.83)                                             | 4317                | 76.3               | 1.04          | (1.02-1.06) |
|                                    | 16-28                                 | 25148  | 11.1       | 1664                               | 6.6                | 0.63          | (0.59-0.66)                                             | 20423               | 81.2               | 1.00          | (0.99-1.00) |
| Desogestrel only                   | 16-19                                 | 29127  |            | 4977                               | 17.1               | 1.52          | (1.47-1.57)                                             | 21797               | 74.8               | 0.90          | (0.89-0.91) |
|                                    | 20-24                                 | 14172  |            | 1719                               | 12.1               | 1.29          | (1.21-1.37)                                             | 9657                | 68.1               | 0.89          | (0.88-0.90) |
|                                    | 25-28                                 | 11880  |            | 1206                               | 10.2               | 1.48          | (1.34-1.64)                                             | 7989                | 67.2               | 0.91          | (0.90-0.93) |
|                                    | 16-28                                 | 55179  | 24.4       | 7902                               | 14.3               | 1.35          | (1.32-1.39)                                             | 39443               | 71.5               | 0.88          | (0.87-0.88) |
| Other oral hormonal contraceptives | 16-28                                 | 23948  | 10.6       | 3016                               | 12.6               | 1.19          | (1.15-1.24)                                             | 18179               | 75.9               | 0.93          | (0.93-0.94) |
| Other galenic forms <sup>a</sup>   | 16-28                                 | 23875  | 10.6       |                                    |                    |               |                                                         |                     |                    |               |             |
| Total                              | 16-28                                 | 226211 | 100.0      | 22958 <sup>c</sup>                 | 11.3 <sup>c</sup>  |               |                                                         | 157840 <sup>c</sup> | 78.0 <sup>c</sup>  |               |             |

<sup>a</sup> intrauterine systems, transdermal patches, implants and injections

<sup>b</sup> irrelevant here as the treatment has long term effect

<sup>c</sup> excluding Other galenic forms

Table 2. Prescription and dispensation in first time users of hormonal contraceptives in Sweden 2007-2009 per product type and prescriber category together with continuation rates.

| Product type                       | Prescriber category | n      | Distribution within prescriber category % | Distribution within product type % | Switching type before 6 months use % | Second prescription and dispensation identical to first % |
|------------------------------------|---------------------|--------|-------------------------------------------|------------------------------------|--------------------------------------|-----------------------------------------------------------|
| Ethinylestradiol + levonorgestrel  | Midwife             | 83146  | 45.1                                      | 84.8                               | 10.9                                 | 82.1                                                      |
|                                    | Physician           | 14914  | 35.7                                      | 15.2                               | 8.8                                  | 77.4                                                      |
|                                    | All prescribers     | 98060  | 40.5                                      | 100.0                              | 10.6                                 | 81.4                                                      |
| Ethinylestradiol + drospirenone    | Midwife             | 16461  | 8.9                                       | 65.5                               | 7.0                                  | 83.3                                                      |
|                                    | Physician           | 8686   | 20.8                                      | 34.5                               | 5.8                                  | 77.2                                                      |
|                                    | All prescribers     | 25147  | 11.2                                      | 100.0                              | 6.6                                  | 81.2                                                      |
| Desogestrel only                   | Midwife             | 47035  | 25.5                                      | 85.2                               | 14.7                                 | 71.7                                                      |
|                                    | Physician           | 8139   | 19.5                                      | 14.8                               | 12.0                                 | 70.0                                                      |
|                                    | All prescribers     | 55174  | 25.6                                      | 100.0                              | 14.3                                 | 71.5                                                      |
| Other oral hormonal contraceptives | Midwife             | 19121  | 10.4                                      | 79.8                               | 12.9                                 | 76.8                                                      |
|                                    | Physician           | 4827   | 11.6                                      | 20.2                               | 11.2                                 | 72.4                                                      |
|                                    | All prescribers     | 23948  | 10.7                                      | 100.0                              | 12.6                                 | 75.9                                                      |
| All hormonal contraceptives        | Midwife             | 184446 | 100.0                                     | 81.5                               | 11.8                                 | 78.7                                                      |
|                                    | Physician           | 41758  | 100.0                                     | 18.5                               | 9.1                                  | 75.1                                                      |
|                                    | All prescribers     | 226204 | 100.0                                     | 100                                | 11.3                                 | 78.0                                                      |

## DISCUSSION

In this nationwide population-based cohort study we found that the most prescribed and dispensed hormonal contraceptives during the study period were COC containing ethinylestradiol + levonorgestrel, desogestrel-only and COC with ethinylestradiol + drospirenone. Women who received an initial prescription of ethinylestradiol combined with either levonorgestrel or drospirenone were more prone to continue with the same drug. On the contrary, women who received desogestrel-only as the initial prescribed and dispensed hormonal contraceptive had 35 % higher probability to choose another type of contraceptive within 6 months of use. Women who originally had received ethinylestradiol + drospirenone were the least likely to switch contraceptive drug during the same period of time.

The Swedish Medical Products Agency (MPA) recommends levonorgestrel containing combined pills as the first choice when prescribing oral contraceptives. Our results show that prescribers most often follow these recommendations. But, the prescription pattern in Sweden differs from most other countries as desogestrel-only pills have a high market share of approximately 25% (13) compared to 4,5% in Denmark and 0.3% in the United States (14, 15).

The clinical implications of our findings are important as side effects or other reasons for discontinuation or switching between different contraceptives increase the risk for unwanted pregnancies. Oral desogestrel-only contraceptives have become a common choice due to fear of the increased risk for venous thromboses in both women who use combined hormonal contraception and prescribers who use combined hormonal contraception. However, an irregular bleeding pattern which is more frequent among users of progestin-only formulations might be a reason for the higher percentage of switchers or discontinuation in this group. Therefore, when prescribing hormonal contraceptives it is necessary to thoroughly evaluate each woman's individual risk for venous thrombosis and also provide a balanced and knowledge based information on the size of these risks. We found that among midwives desogestrel-only was the second most common prescribed hormonal contraceptive. At the same time and especially among the youngest group of women, 16 – 19 years, the percentage of switchers was the highest.

Cerazette® (desogestrel 75µg) was registered in Sweden 2001 and the number of users, especially in the younger age categories increased rapidly during the following years. During the same time, the number of teenage abortions increased (16) and it can be speculated that the problem with bleeding control associated with progestin-only methods have lead to poorer compliance in this group of users and as a consequence an increased risk of unprotected intercourse leading to unwanted pregnancies.

During the past five years there has been an intense debate concerning a possible difference in the thromboembolic risk between COC containing levonorgestrel- and drospirenone. Retrospective studies have found an increased risk in women using ethinylestradiol + drospirenone compared with

1  
2  
3 ethinylestradiol + levonorgestrel (17-20). However these results have been contradicted by results from  
4 prospective studies (21-24). When transforming results from this kind of studies into clinical  
5 recommendations, the question of adherence and compliance is crucial. A possible small increase in risk  
6 may be balanced by a better adherence to treatment. The results from the present study indicate a more  
7 favourable profile for COC containing drospirenone when it comes to adherence and compliance. To our  
8 best knowledge this has not previously been shown. A possible more favourable thromboembolic risk  
9 profile with a COC containing ethinylestradiol + levonorgestrel may be counteracted by a poorer  
10 adherence compared with pills containing drospirenone and a possible increased risk of unintended  
11 pregnancies. As the risk of venous thromboembolism increases rapidly already during early pregnancy this  
12 must be taken into account.

13  
14 A substantial number of women had no second dispensation in six months of any contraceptive product  
15 (table 1). The design of the present study does not provide any information on this group and we cannot  
16 draw any conclusions. We can, however, speculate that most probably the group is a mix of women  
17 stopping contraceptive use and women switching to a non-hormonal contraceptive method. The use of  
18 copper-IUDs is widespread in Sweden and the register used in this study does not provide information on  
19 copper-IUD use as this is not a pharmaceutical product. As COC with ethinylestradiol + drospirenone is  
20 second-line treatment in Sweden, it seems reasonable that this group is bigger. The actual number of  
21 women who discontinued without switching to a non-hormonal method is unknown.

### 22 23 24 **Strengths and limitations of the study**

25  
26 The Swedish Prescribed Drug Register covers all drugs dispensed from all Swedish pharmacies since July  
27 2005. Since sale information is transferred directly from the cashier to the register, data is complete and  
28 results in a high external validity for the register.

29  
30 A further strength is that the large amount of data gives a high precision to the point estimates. These  
31 factors are the usual strengths in register research together with avoidance of errors arising out of recall  
32 bias, which is a common problem arising when the data used have been collected from interviews and  
33 questionnaires.

34  
35 We have not been able to control for a wish to become pregnant in this study. A lowered rate of “repeated  
36 prescription and dispensation identical to the first” may to some extent be an effect of plans to become  
37 pregnant. Therefore, the percentage rates for “repeated prescription and dispensation identical to the first”  
38 might be somewhat difficult to interpret. However, the RR estimates are useful since there is no reasonable  
39 explanation of the choice made by women to use desogestrel-only as an initial formulation to a greater  
40 extent because these women might be more prone to become pregnant.

## Conclusion

The three most common types of initially prescribed hormonal contraceptive in Sweden are from most to least common: ethinylestradiol + levonorgestrel (43.3 %), desogestrel-only (24.4 %) and ethinylestradiol + drospirenone (11.1 %). Of these drugs, desogestrel-only users were most likely to switch to another drug during the first six months with 14.3% changing. The RR for this type of change was 1.35, compared to ethinylestradiol + levonorgestrel. Women using drospirenone-containing COC were less likely to switch within six months than women using levonorgestrel-containing COC (RR 0.63; 0.59-0.66). The prescription pattern concerning the women's continuation rates differed overall only slightly between the physicians' and the midwives', although there was a lowered prescription and dispensation rate of ethinylestradiol + drospirenone by midwives compared to physicians. These findings may be of clinical importance when tailoring hormonal contraceptives on an individual basis.

## REFERENCES

1. Trussell J. Understanding contraceptive failure. *Best Pract Res Clin Obstet Gynaecol* 2009;23:199-209.
2. Lindh I, Blohm F, Andersson-Ellström E, Milsom I. Contraceptive use and pregnancy outcome in three generations of Swedish female teenagers from the same urban population. *Contraception* 2009;80: 163–169.
3. Larsson M, Tydén T, Hanson U, Häggström-Nordin E Contraceptive use and associated factors among Swedish high school students. *Eur J Contracept Reprod Health Care* 2007;12:119-24.
4. Lawrie TA, Helmerhorst FM, Maitra NK, Kulier R, Bloemenkamp K, Gülmezoglu AM. Types of progestogens in combined oral contraception: effectiveness and side-effects. *Cochrane Database Syst Rev* 2011;11:CD004861.
5. Maitra N, Kulier R, Bloemenkamp KW, Helmerhorst FM, Gülmezoglu AM. Progestogens in combined oral contraceptives for contraception. *Cochrane Database Syst Rev*. 2004;3:CD004861. Update in *Cochrane Database Syst Rev* 011;5:CD004861.
6. Foster DG, Parvataneni R, de Bocanegra HT, Lewis C, Bradsberry M, Darney P. Number of oral contraceptive pill packages dispensed, method continuation, and costs. *Obstet Gynecol* 2006;108:1107-14.
7. Potter JE, McKinnon S, Hopkins K, Amastae J, Shedlin MG, Powers DA, Grossman D. Continuation of prescribed compared with over-the-counter oral contraceptives. *Obstet Gynecol* 2011;117:551-7.
8. Sucato GS, Land SR, Murray PJ, Cecchini R, Gold MA. Adolescents' experiences using the contraceptive patch versus pills. *J Pediatr Adolesc Gynecol* 2011;24:197-203.
9. Murphy PA, Brixner D. Hormonal contraceptive discontinuation patterns according to formulation: investigation of associations in an administrative claims database. *Contraception* 2008;77:257-63
10. Van Vliet HA, Grimes DA, Lopez LM, Schulz KF, Helmerhorst FM. Triphasic versus monophasic oral contraceptives for contraception. *Cochrane Database Syst Rev* 2011; 9;:CD003553.
11. Wettermark B, Hammar N, Fored CM, Leimanis A, Otterblad Olausson P, Bergman U, Persson I, Sundström A, Westerholm B, Rosén M. The new Swedish Prescribed Drug Register-opportunities for pharmacoepidemiological research and experience from the first six months. *Pharmacoepidemiol Drug Saf* 2007;16:726-35.



12. Kirkwood BR, Sterne JAC, Essential Medical Statistics. Second ed. *Blackwell Science Ltd, Oxford*, 2003.
13. Swedish National Board of Health and Welfare;  
<http://www.socialstyrelsen.se/statistik/statistikdatabas>. Retrieved December 2012
14. Wilson NM, Laursen M, Lidegaard Ø. Oral contraception in Denmark 1998-2010. *Acta Obstet Gynecol Scand*. 2012;91:810-5.
15. Hall KS, Trussell J, Schwarz EB. Progestin-only contraceptive pill use among women in the United States. *Contraception* 2012;86:653-8
16. Swedish National Board of Health and Welfare;  
<http://www.socialstyrelsen.se/statistik/statistikefteramne/aborter>. Retrieved November 2012
17. Lidegaard O, Nielsen LH, Skovlund CW, Løkkegaard E. Venous thrombosis in users of non-hormonal contraception: follow-up study, Denmark 2001-10. *BMJ* 2012;344:e2990.
18. Jick SS, Hernandez RK. Risk of non-fatal venous thromboembolism in women using oral contraceptives containing drospirenone compared with women using oral contraceptives containing levonorgestrel: case-control study using United States claims data. *BMJ* 2011;342:d2151. doi: 10.1136/bmj.d2151
19. Parkin L, Sharples K, Hernandez RK, Jick SS. Risk of venous thromboembolism in users of oral contraceptives containing drospirenone or levonorgestrel: nested case-control study based on UK General Practice Research Database. *BMJ* 2011;342:d2139. doi: 10.1136/bmj.d2139.
20. Lidegaard Ø, Milsom I, Geirsson RT, Skjeldestad FE. Hormonal contraception and venous thromboembolism. *Acta Obstet Gynecol Scand* 2012;9:769-78.
21. Dinger JC, Heinemann LA, Kühl-Habich D. The safety of a drospirenone-containing oral contraceptive: final results from the European Active Surveillance Study on oral contraceptives based on 142,475 women-years of observation. *Contraception* 2007;75:344-54.
22. Dinger J, Assmann A, Möhner S, Minh TD. Risk of venous thromboembolism and the use of dienogest- and drospirenone-containing oral contraceptives: results from a German case-control study. *J Fam Plann Reprod Health Care* 2010;36:123-9.
23. Shapiro S, Dinger J. Risk of venous thromboembolism among users of oral contraceptives: a review of two recently published studies. *J Fam Plann Reprod Health Care* 2010;36:33-8.

1  
2  
3  
4  
5  
6  
7  
8  
9  
10  
11  
12  
13  
14  
15  
16  
17  
18  
19  
20  
21  
22  
23  
24  
25  
26  
27  
28  
29  
30  
31  
32  
33  
34  
35  
36  
37  
38  
39  
40  
41  
42  
43  
44  
45  
46  
47  
48  
49  
50  
51  
52  
53  
54  
55  
56  
57  
58  
59  
60

24. Dinger J, Shapiro S. Combined oral contraceptives, venous thromboembolism, and the problem of interpreting large but incomplete datasets. *J Fam Plann Reprod Health Care* 2012;38:2-6

For peer review only

## CONTRIBUTORS

AJ and JB planned the study, supervised the analysis, interpreted the results, and wrote the manuscript. AJ is guarantor of the study.

ABW planned the study, prepared all data from the Swedish Prescribed Drug Register, made the statistical analyses and interpreted the results.

ML and AF interpreted the results, and revised the manuscript.

All authors discussed and approved the final manuscript.

AJ and JB decided when and where to attempt publication.

**Funding:** The expenses were covered by the County Council of Östergötland, Sweden.

**Competing interests:** All authors have completed a disclosure form at [www.icmje.org/coi\\_disclosure.pdf](http://www.icmje.org/coi_disclosure.pdf) (available on request from the corresponding author) and declare: no support from any organisation for the submitted work.

JB report financial relations to MSD Sweden and Bayer AB, Sweden (see attached declaration). The other investigators declared no financial relationships with any organisations that might have an interest in the submitted work in the previous three years, and no other relationships or activities that could appear to have influenced the submitted work.

**Ethical approval:** This study was approved by the Regional Ethical Review Board, Linköping, Sweden (Dnr M125-08).

**Data sharing:** No additional data available.

1  
2  
3  
4  
5  
6  
7  
8  
9  
10  
11  
12  
13  
14  
15  
16  
17  
18  
19  
20  
21  
22  
23  
24  
25  
26  
27  
28  
29  
30  
31  
32  
33  
34  
35  
36  
37  
38  
39  
40  
41  
42  
43  
44  
45  
46  
47  
48  
49  
50  
51  
52  
53  
54  
55  
56  
57  
58  
59  
60**What is already known on this topic**

Compliance and adherence to contraceptive use is almost always overestimated in clinical trials. Data on difference in compliance and adherence between different formulations of oral contraception is lacking or of poor quality. Knowledge of adherence and compliance is essential when it comes to avoid unintended pregnancies.

**What this study adds**

Users of progestin-only pills more frequently choose another hormonal contraceptive method or discontinue use within six months. Users of drospirenone containing combined oral contraceptives were the least likely to switch method. The results indicate a more favourable profile concerning adherence to treatment for drospirenone containing combined oral contraceptives. This may be of clinical interest when it comes to a decision of what type of oral contraceptives the individual woman should be recommended.

STROBE Statement – checklist of items that should be included in reports of observational studies.

|     |                                                                                                                                                                                                                                                                                     |
|-----|-------------------------------------------------------------------------------------------------------------------------------------------------------------------------------------------------------------------------------------------------------------------------------------|
| 1a  | Done                                                                                                                                                                                                                                                                                |
| 1b  | Done                                                                                                                                                                                                                                                                                |
| 2   | Done                                                                                                                                                                                                                                                                                |
| 3   | <i>Intoduction</i> , last paragraph                                                                                                                                                                                                                                                 |
| 4   | <i>Method</i> , first sentence                                                                                                                                                                                                                                                      |
| 5   | <i>Method</i> , first and second paragraph                                                                                                                                                                                                                                          |
| 6a  | <i>Method</i> , first and second paragraph                                                                                                                                                                                                                                          |
| 6b  | We consider this as not relevant                                                                                                                                                                                                                                                    |
| 7   | In <i>Statistical analysis</i> , there are descriptions of the variables: “age groups”, “changing type” and “using same drug after 6 months”                                                                                                                                        |
| 8   | Not relevant – all information is from the Swedish Prescribed Drug Register                                                                                                                                                                                                         |
| 9   | In this study with an intention to solely describe the switching/ continuation rate and not to explain its underlying causes, the risk of presenting biased results is not an immediate problem. Especially not since we consider the external validity in this study as very high. |
| 10  | We consider this as not relevant                                                                                                                                                                                                                                                    |
| 11  | <i>Statistical analyses</i>                                                                                                                                                                                                                                                         |
| 12a | Relative risks together with 95% CIs are used for the analyses, and its composition in terms of risk outcome and reference category in the ratio as well as CI interval calculations are presented in <i>Statistical analysis</i> .                                                 |
| 12b | We consider this as not relevant                                                                                                                                                                                                                                                    |
| 12c | We have used register data with a most probable complete registration (see <i>Strengths and limitations of the study</i> )                                                                                                                                                          |
| 12d | Please see item 12c                                                                                                                                                                                                                                                                 |
| 12e | We have previously calculated the proportions for switching product within 12 months and found the pattern quite similar.                                                                                                                                                           |
| 13a | See table 1 and table 2                                                                                                                                                                                                                                                             |
| 13b | We consider this as not relevant                                                                                                                                                                                                                                                    |
| 13c | We believe that the description of inclusion is rather uncomplicated and that the description in <i>Method</i> , first and paragraph is easy to follow.                                                                                                                             |
| 14a | We have not included data on such information in this study                                                                                                                                                                                                                         |
| 14b | There are no missing data in our chosen variables                                                                                                                                                                                                                                   |
| 14c | The follow-up time is exactly six months for each woman in the study.                                                                                                                                                                                                               |
| 15  | Please see table 1 and table 2                                                                                                                                                                                                                                                      |
| 16a | Please see table 1                                                                                                                                                                                                                                                                  |
| 16b | Please see <i>Statistical analyses</i>                                                                                                                                                                                                                                              |
| 16c | Please see table 1                                                                                                                                                                                                                                                                  |
| 17  | We consider this as not relevant                                                                                                                                                                                                                                                    |
| 18  | <i>Discussion</i> , first paragraph                                                                                                                                                                                                                                                 |
| 19  | Please see <i>Strengths and limitations of the study</i>                                                                                                                                                                                                                            |
| 20  | <i>Conclusion</i>                                                                                                                                                                                                                                                                   |
| 21  | Very high external validity (see <i>Strengths and limitations of the study</i> )                                                                                                                                                                                                    |
| 22  | No funding                                                                                                                                                                                                                                                                          |

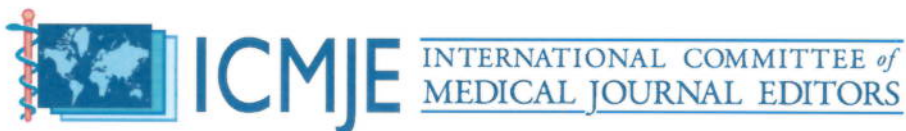

## ICMJE Form for Disclosure of Potential Conflicts of Interest

### Section 1. Identifying Information

1. Given Name (First Name)

Ann

2. Surname (Last Name)

Josefsson

3. Date

13-June-2013

4. Are you the corresponding author?

Yes  No

5. Manuscript Title

Patterns of adherence to oral hormonal contraceptives in a cohort of first time users: a population based registry study, Sweden 2005-2010

6. Manuscript Identifying Number (if you know it)

### Section 2. The Work Under Consideration for Publication

Did you or your institution **at any time** receive payment or services from a third party (government, commercial, private foundation, etc.) for any aspect of the submitted work (including but not limited to grants, data monitoring board, study design, manuscript preparation, statistical analysis, etc.)?

Are there any relevant conflicts of interest?  Yes  No

### Section 3. Relevant financial activities outside the submitted work.

Place a check in the appropriate boxes in the table to indicate whether you have financial relationships (regardless of amount of compensation) with entities as described in the instructions. Use one line for each entity; add as many lines as you need by clicking the "Add +" box. You should report relationships that were **present during the 36 months prior to publication**.

Are there any relevant conflicts of interest?  Yes  No

### Section 4. Intellectual Property -- Patents & Copyrights

Do you have any patents, whether planned, pending or issued, broadly relevant to the work?  Yes  No

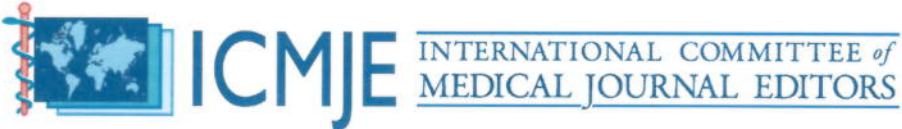

## ICMJE Form for Disclosure of Potential Conflicts of Interest

### Section 5. Relationships not covered above

Are there other relationships or activities that readers could perceive to have influenced, or that give the appearance of potentially influencing, what you wrote in the submitted work?

- Yes, the following relationships/conditions/circumstances are present (explain below):
- No other relationships/conditions/circumstances that present a potential conflict of interest

At the time of manuscript acceptance, journals will ask authors to confirm and, if necessary, update their disclosure statements. On occasion, journals may ask authors to disclose further information about reported relationships.

### Section 6. Disclosure Statement

Based on the above disclosures, this form will automatically generate a disclosure statement, which will appear in the box below.

### Evaluation and Feedback

Please visit <http://www.icmje.org/cgi-bin/feedback> to provide feedback on your experience with completing this form.

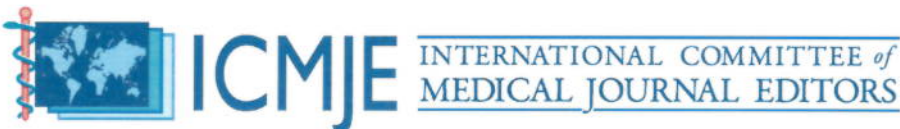

## ICMJE Form for Disclosure of Potential Conflicts of Interest

### Section 1. Identifying Information

|                                                   |                                                                                                                                            |                             |
|---------------------------------------------------|--------------------------------------------------------------------------------------------------------------------------------------------|-----------------------------|
| 1. Given Name (First Name)                        | 2. Surname (Last Name)                                                                                                                     | 3. Date                     |
| Ann-Britt                                         | Wirehn                                                                                                                                     | 13-June-2013                |
| 4. Are you the corresponding author?              | <input type="checkbox"/> Yes <input checked="" type="checkbox"/> No                                                                        | Corresponding Author's Name |
|                                                   |                                                                                                                                            | Ann Josefsson               |
| 5. Manuscript Title                               | Patterns of adherence to oral hormonal contraceptives in a cohort of first time users: a population based registry study, Sweden 2005-2010 |                             |
| 6. Manuscript Identifying Number (if you know it) |                                                                                                                                            |                             |

### Section 2. The Work Under Consideration for Publication

Did you or your institution **at any time** receive payment or services from a third party (government, commercial, private foundation, etc.) for any aspect of the submitted work (including but not limited to grants, data monitoring board, study design, manuscript preparation, statistical analysis, etc.)?

Are there any relevant conflicts of interest?  Yes  No

### Section 3. Relevant financial activities outside the submitted work.

Place a check in the appropriate boxes in the table to indicate whether you have financial relationships (regardless of amount of compensation) with entities as described in the instructions. Use one line for each entity; add as many lines as you need by clicking the "Add +" box. You should report relationships that were **present during the 36 months prior to publication**.

Are there any relevant conflicts of interest?  Yes  No

### Section 4. Intellectual Property -- Patents & Copyrights

Do you have any patents, whether planned, pending or issued, broadly relevant to the work?  Yes  No



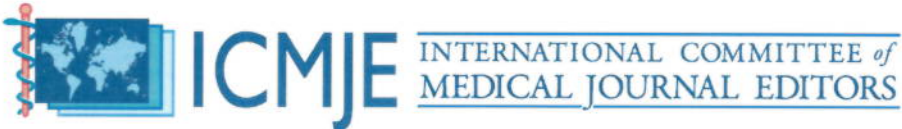

## ICMJE Form for Disclosure of Potential Conflicts of Interest

### Section 5. Relationships not covered above

Are there other relationships or activities that readers could perceive to have influenced, or that give the appearance of potentially influencing, what you wrote in the submitted work?

- Yes, the following relationships/conditions/circumstances are present (explain below):
- No other relationships/conditions/circumstances that present a potential conflict of interest

At the time of manuscript acceptance, journals will ask authors to confirm and, if necessary, update their disclosure statements. On occasion, journals may ask authors to disclose further information about reported relationships.

### Section 6. Disclosure Statement

Based on the above disclosures, this form will automatically generate a disclosure statement, which will appear in the box below.

### Evaluation and Feedback

Please visit <http://www.icmje.org/cgi-bin/feedback> to provide feedback on your experience with completing this form.

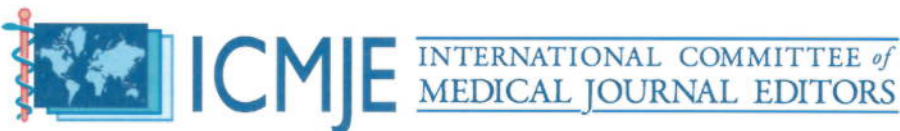

## ICMJE Form for Disclosure of Potential Conflicts of Interest

### Section 1. Identifying Information

|                                                                                                                                                                   |                                                                     |                                              |
|-------------------------------------------------------------------------------------------------------------------------------------------------------------------|---------------------------------------------------------------------|----------------------------------------------|
| 1. Given Name (First Name)<br>Malou                                                                                                                               | 2. Surname (Last Name)<br>Lindberg                                  | 3. Date<br>13-June-2013                      |
| 4. Are you the corresponding author?                                                                                                                              | <input type="checkbox"/> Yes <input checked="" type="checkbox"/> No | Corresponding Author's Name<br>Ann Josefsson |
| 5. Manuscript Title<br>Patterns of adherence to oral hormonal contraceptives in a cohort of first time users: a population based registry study, Sweden 2005-2010 |                                                                     |                                              |
| 6. Manuscript Identifying Number (if you know it)                                                                                                                 |                                                                     |                                              |

### Section 2. The Work Under Consideration for Publication

Did you or your institution **at any time** receive payment or services from a third party (government, commercial, private foundation, etc.) for any aspect of the submitted work (including but not limited to grants, data monitoring board, study design, manuscript preparation, statistical analysis, etc.)?

Are there any relevant conflicts of interest?  Yes  No

### Section 3. Relevant financial activities outside the submitted work.

Place a check in the appropriate boxes in the table to indicate whether you have financial relationships (regardless of amount of compensation) with entities as described in the instructions. Use one line for each entity; add as many lines as you need by clicking the "Add +" box. You should report relationships that were **present during the 36 months prior to publication**.

Are there any relevant conflicts of interest?  Yes  No

### Section 4. Intellectual Property -- Patents & Copyrights

Do you have any patents, whether planned, pending or issued, broadly relevant to the work?  Yes  No

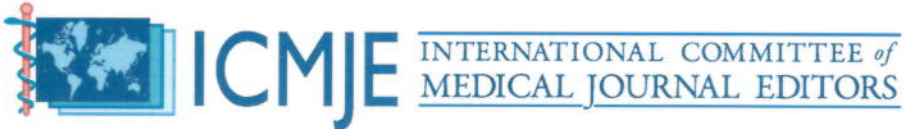

## ICMJE Form for Disclosure of Potential Conflicts of Interest

### Section 5. Relationships not covered above

Are there other relationships or activities that readers could perceive to have influenced, or that give the appearance of potentially influencing, what you wrote in the submitted work?

- Yes, the following relationships/conditions/circumstances are present (explain below):
- No other relationships/conditions/circumstances that present a potential conflict of interest

At the time of manuscript acceptance, journals will ask authors to confirm and, if necessary, update their disclosure statements. On occasion, journals may ask authors to disclose further information about reported relationships.

### Section 6. Disclosure Statement

Based on the above disclosures, this form will automatically generate a disclosure statement, which will appear in the box below.

### Evaluation and Feedback

Please visit <http://www.icmje.org/cgi-bin/feedback> to provide feedback on your experience with completing this form.

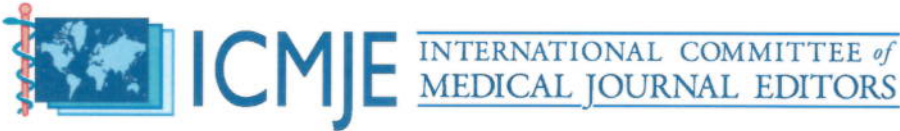

## ICMJE Form for Disclosure of Potential Conflicts of Interest

### Section 5. Relationships not covered above

Are there other relationships or activities that readers could perceive to have influenced, or that give the appearance of potentially influencing, what you wrote in the submitted work?

- Yes, the following relationships/conditions/circumstances are present (explain below):
- No other relationships/conditions/circumstances that present a potential conflict of interest

At the time of manuscript acceptance, journals will ask authors to confirm and, if necessary, update their disclosure statements. On occasion, journals may ask authors to disclose further information about reported relationships.

### Section 6. Disclosure Statement

Based on the above disclosures, this form will automatically generate a disclosure statement, which will appear in the box below.

### Evaluation and Feedback

Please visit <http://www.icmje.org/cgi-bin/feedback> to provide feedback on your experience with completing this form.

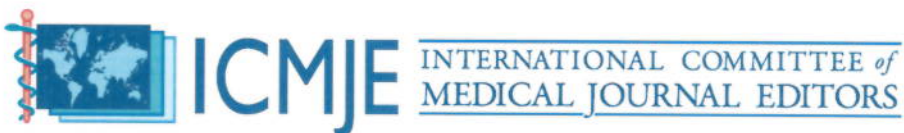

## ICMJE Form for Disclosure of Potential Conflicts of Interest

### Section 1. Identifying Information

|                                                                                                                                                                   |                                                                     |                                              |
|-------------------------------------------------------------------------------------------------------------------------------------------------------------------|---------------------------------------------------------------------|----------------------------------------------|
| 1. Given Name (First Name)<br>Annika                                                                                                                              | 2. Surname (Last Name)<br>Foldemo                                   | 3. Date<br>13-June-2013                      |
| 4. Are you the corresponding author?                                                                                                                              | <input type="checkbox"/> Yes <input checked="" type="checkbox"/> No | Corresponding Author's Name<br>Ann Josefsson |
| 5. Manuscript Title<br>Patterns of adherence to oral hormonal contraceptives in a cohort of first time users: a population based registry study, Sweden 2005-2010 |                                                                     |                                              |
| 6. Manuscript Identifying Number (if you know it)                                                                                                                 |                                                                     |                                              |

### Section 2. The Work Under Consideration for Publication

Did you or your institution **at any time** receive payment or services from a third party (government, commercial, private foundation, etc.) for any aspect of the submitted work (including but not limited to grants, data monitoring board, study design, manuscript preparation, statistical analysis, etc.)?

Are there any relevant conflicts of interest?  Yes  No

### Section 3. Relevant financial activities outside the submitted work.

Place a check in the appropriate boxes in the table to indicate whether you have financial relationships (regardless of amount of compensation) with entities as described in the instructions. Use one line for each entity; add as many lines as you need by clicking the "Add +" box. You should report relationships that were **present during the 36 months prior to publication**.

Are there any relevant conflicts of interest?  Yes  No

### Section 4. Intellectual Property -- Patents & Copyrights

Do you have any patents, whether planned, pending or issued, broadly relevant to the work?  Yes  No

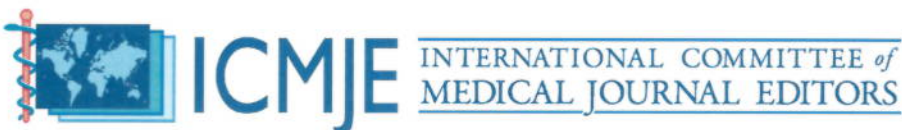

## ICMJE Form for Disclosure of Potential Conflicts of Interest

### Section 1. Identifying Information

1. Given Name (First Name)  
Jan

2. Surname (Last Name)  
Brynhildsen

3. Date  
13-June-2013

4. Are you the corresponding author?  Yes  No Corresponding Author's Name

5. Manuscript Title  
Patterns of adherence to oral hormonal contraceptives in a cohort of first time users: a population based registry study, Sweden 2005-2010

6. Manuscript Identifying Number (if you know it)

### Section 2. The Work Under Consideration for Publication

Did you or your institution at **any time** receive payment or services from a third party (government, commercial, private foundation, etc.) for any aspect of the submitted work (including but not limited to grants, data monitoring board, study design, manuscript preparation, statistical analysis, etc.)?

Are there any relevant conflicts of interest?  Yes  No

### Section 3. Relevant financial activities outside the submitted work.

Place a check in the appropriate boxes in the table to indicate whether you have financial relationships (regardless of amount of compensation) with entities as described in the instructions. Use one line for each entity; add as many lines as you need by clicking the "Add +" box. You should report relationships that were **present during the 36 months prior to publication**.

Are there any relevant conflicts of interest?  Yes  No

If yes, please fill out the appropriate information below.

| Name of Entity | Grant?                   | Personal Fees?                      | Non-Financial Support?   | Other?                   | Comments |
|----------------|--------------------------|-------------------------------------|--------------------------|--------------------------|----------|
|                | <input type="checkbox"/> | <input checked="" type="checkbox"/> | <input type="checkbox"/> | <input type="checkbox"/> | Se below |

### Section 4. Intellectual Property -- Patents & Copyrights

Do you have any patents, whether planned, pending or issued, broadly relevant to the work?  Yes  No

## ICMJE Form for Disclosure of Potential Conflicts of Interest

### Section 5. Relationships not covered above

Are there other relationships or activities that readers could perceive to have influenced, or that give the appearance of potentially influencing, what you wrote in the submitted work?

- Yes, the following relationships/conditions/circumstances are present (explain below):  
 No other relationships/conditions/circumstances that present a potential conflict of interest

#### Competing interests:

Jan Brynhildsen (JB) has been reimbursed by Merck Sharpe & Dohme (MSD), Sweden, the manufacturer of desogestrel-containing contraceptives in Sweden, for running educational programmes and giving lectures. JB has also been paid by Bayer AB, Sweden, the manufacturer of some of the levonorgestrel-containing contraceptives and all drospirenone-containing combined oral contraceptives available in Sweden, for giving lectures. JB has also been the member of the Swedish medical advisory board of MSD between 2008 and 2012.

At the time of manuscript acceptance, journals will ask authors to confirm and, if necessary, update their disclosure statements. On occasion, journals may ask authors to disclose further information about reported relationships.

### Section 6. Disclosure Statement

Based on the above disclosures, this form will automatically generate a disclosure statement, which will appear in the box below.

#### Competing interests:

Jan Brynhildsen (JB) has been reimbursed by Merck Sharpe & Dohme (MSD), Sweden, the manufacturer of desogestrel-containing contraceptives in Sweden, for running educational programmes and giving lectures. JB has also been paid by Bayer AB, Sweden, the manufacturer of some of the levonorgestrel-containing contraceptives and all drospirenone-containing combined oral contraceptives available in Sweden, for giving lectures. JB has also been the member of the Swedish medical advisory board of MSD between 2008 and 2012.

### Evaluation and Feedback

Please visit <http://www.icmje.org/cgi-bin/feedback> to provide feedback on your experience with completing this form.

1  
2  
3 16th January 2013  
4

5 Dear Dr. Josefsson  
6

7 # BMJ.2013.010282 entitled "Patterns of adherence to oral hormonal contraceptives in a cohort of first  
8 time users: a population based registry study, Sweden 2005-2010"  
9

10  
11 Thank you for sending us your paper. We read it with interest but I regret to say that we have decided  
12 not to publish it in the BMJ.  
13

14 We enjoyed reading the study and were impressed by the comprehensive nature of your dataset.  
15 However we also noted the limitations and particularly that the nature of the study makes it difficult to  
16 know why people started particular preparations and also why people switched (or discontinued). The  
17 study may be appropriate for a specialist journal and hopefully lead to further research into the  
18 adverse effects of the different preparations.  
19

20  
21 We receive over 8000 submissions a year and accept less than 10%. We do therefore have to make  
22 hard decisions on just how interesting an article will be to our general clinical readers, how much it  
23 adds, and how much practical value it will be.  
24

25  
26 If your paper is describing a research project you may want to consider sending this paper to BMJ  
27 Open, our new sister journal, which is now taking submissions at  
28 <http://mc.manuscriptcentral.com/bmjopen>. BMJ Open ( <http://bmjopen.bmj.com> ) is an open access,  
29 open peer-reviewed, online journal from the BMJ Group dedicated to publishing high quality,  
30 methodologically sound medical research from all disciplines and therapeutic areas. All types of  
31 research article are welcome, from pilot studies to meta-analyses.  
32

33  
34 If you would like your article to be considered by BMJ Open submit at the address above, or contact  
35 the editorial office [editorial.bmjopen@bmjgroup.com](mailto:editorial.bmjopen@bmjgroup.com) with your manuscript number for more  
36 information. Papers accepted for publication will be subject to an article processing charge.  
37

38  
39 Thank you for considering BMJ for the publication of your research. I hope the outcome of this  
40 specific submission will not discourage you from the submission of future manuscripts.  
41

42 Yours sincerely  
43

44  
45 Krishna Chinthapalli  
46 [kchinthapalli@bmj.com](mailto:kchinthapalli@bmj.com)  
47  
48  
49  
50  
51  
52  
53  
54  
55  
56  
57  
58  
59  
60





**Continuation rates of oral hormonal contraceptives in a cohort of first time users: a population based registry study, Sweden 2005-2010**

|                                 |                                                                                                                                                                                                                                                                                                                                                                                                                                                                                                                             |
|---------------------------------|-----------------------------------------------------------------------------------------------------------------------------------------------------------------------------------------------------------------------------------------------------------------------------------------------------------------------------------------------------------------------------------------------------------------------------------------------------------------------------------------------------------------------------|
| Journal:                        | <i>BMJ Open</i>                                                                                                                                                                                                                                                                                                                                                                                                                                                                                                             |
| Manuscript ID:                  | bmjopen-2013-003401.R1                                                                                                                                                                                                                                                                                                                                                                                                                                                                                                      |
| Article Type:                   | Research                                                                                                                                                                                                                                                                                                                                                                                                                                                                                                                    |
| Date Submitted by the Author:   | 23-Aug-2013                                                                                                                                                                                                                                                                                                                                                                                                                                                                                                                 |
| Complete List of Authors:       | Josefsson, Dr Ann; Faculty of Health Sciences , Division of obstetrics&gynaecology, Dep. Clinical and Experimental Medicine<br>Wiréhn, Ann-Britt; Faculty of Health Sciences, Div Obstetrics& Gynaecology, Dep. Clinical and Experimental Sciences<br>Lindberg, Malou; Faculty of Health Sciences, Department of Medical and Health Sciences, Primary Care<br>Foldemo, Annika; Department of Medical and Health Sciences,<br>Brynhildsen, Jan; Obstetrics and Gynaecology, Department of Clinical and Experimental medicine |
| <b>Primary Subject Heading</b>: | Obstetrics and gynaecology                                                                                                                                                                                                                                                                                                                                                                                                                                                                                                  |
| Secondary Subject Heading:      | Reproductive medicine, Obstetrics and gynaecology                                                                                                                                                                                                                                                                                                                                                                                                                                                                           |
| Keywords:                       | Reproductive medicine < GYNAECOLOGY, PUBLIC HEALTH, Community gynaecology < GYNAECOLOGY                                                                                                                                                                                                                                                                                                                                                                                                                                     |
|                                 |                                                                                                                                                                                                                                                                                                                                                                                                                                                                                                                             |

SCHOLARONE™  
Manuscripts

only

1  
2  
3 **Continuation rates of oral hormonal contraceptives in a cohort of first time**  
4 **users: a population based registry study, Sweden 2005-2010**  
5  
6

7 Ann Josefsson *Associate Professor, senior consultant*<sup>1</sup>, Ann-Britt Wiréhn *PhD, statistician*<sup>1,2</sup>  
8

9 Malou Lindberg *Associate Professor*<sup>2,3</sup>, Anniqa Foldemo *PhD*<sup>2,4</sup>, Jan Brynhildsen *Associate*  
10 *Professor, senior consultant*<sup>1</sup>  
11

12 <sup>1</sup>Division of Obstetrics and Gynaecology, Department of Clinical and Experimental  
13 Medicine, Faculty of Health Sciences, Linköping University, Department of Obstetrics and  
14 Gynaecology in Linköping, County Council of Östergötland, Linköping, Sweden  
15

16 <sup>2</sup>Local Health Care Research and Development Unit, County Council in Östergötland,  
17 Linköping, Sweden  
18

19 <sup>3</sup>Department of Medical and Health Sciences, Primary Care, Linköping University,  
20 Linköping, Sweden  
21

22 <sup>4</sup>Department of Medical and Health Sciences, Faculty of Health Sciences, Linköping  
23 University, Linköping, Sweden  
24  
25

26  
27  
28  
29  
30  
31  
32 Correspondence to:

33 Jan Brynhildsen *Division of Obstetrics and Gynaecology,*  
34 *Linköping University, Faculty of Health Sciences,*  
35 *University Hospital,*  
36 *SE-58185, Linköping, Sweden*  
37

38  
39  
40  
41 [jan.brynhildsen@lio.se](mailto:jan.brynhildsen@lio.se)

42  
43 [Tel: +46 10 1030000](tel:+46101030000)

44  
45  
46 Fax: +46 13 14 81 56  
47

48  
49  
50 The Corresponding Author has the right to grant on behalf of all authors and does grant on  
51 behalf of all authors, an exclusive licence on a worldwide basis to the BMJ Publishing Group  
52 Ltd to permit this article (if accepted) to be published in BMJ editions and any other  
53 BMJ PGL products and sublicences such use and exploit all subsidiary rights, as set out in our  
54  
55  
56  
57  
58  
59  
60

1  
2  
3 licence.  
4  
5

6 **Key words:** Hormonal contraceptives; Oral contraceptives; Patient adherence; Registries ;  
7 Follow-up studies  
8  
9

10  
11 **Word count:**  
12  
13  
14  
15  
16  
17  
18  
19  
20  
21  
22  
23  
24  
25  
26  
27  
28  
29  
30  
31  
32  
33  
34  
35  
36  
37  
38  
39  
40  
41  
42  
43  
44  
45  
46  
47  
48  
49  
50  
51  
52  
53  
54  
55  
56  
57  
58  
59  
60

For peer review only

**ABSTRACT**

**Objective** To investigate if continuation rates in first-time users of oral hormonal contraceptives differed between different formulations and to measure if rates were related to prescribing categories, i.e. physicians and midwives.

**Design** A longitudinal national population-based registry study

**Setting** The Swedish prescribed drug register

**Participants** All females born 1977-1994 defined as first-time users of hormonal contraceptives from 2007 to 2009 (n = 226 211).

**Main outcome measures** Tendency to switch type of hormonal contraceptive within 6 months use and repeated dispensation identical to first were estimated as percentages and relative risks. Physicians' and midwives' prescription patterns concerning the women's continuation rates of oral hormonal contraceptive type.

**Results** In Sweden there were 782 375 women born 1977-1994 at the time of the study. Of these, 226 211 women were identified as first-time users of hormonal contraceptives. Ethinylestradiol + levonorgestrel, desogestrel-only and ethinylestradiol + drospirenone were the hormonal contraceptives most commonly dispensed for first-time users, 43.3 %, 24.4 % and 11.1 %, respectively. The overall rate of switching contraceptive type in the first six months was 11.3%, highest for desogestrel-only (14.3%) and lowest for ethinylestradiol + drospirenone (6.6 %). The switching rate for all three products was highest in 16-19 year age group. Having a repeated dispensation identical to the initial was highest for users of ethinylestradiol either combined with levonorgestrel or drospirenone, 81.4% and 81.2% respectively, whereas this rate for the initial desogestrel-only users was 71.5%. The RR of switching of contraceptive type within the first six months was 1.35 (95% CI: 1.32-1.39) for desogestrel-only and 0.63 (0.59-0.66) for ethinylestradiol + drospirenone compared to ethinylestradiol + levonorgestrel as reference category. The physicians' and midwives' prescription patterns concerning the women's continuation rates differed only slightly.

**Conclusion** Desogestrel-only users conferred the highest switcher rate to another hormonal contraceptive within a 6-months period. Users of ethinylestradiol + levonorgestrel were more prone to switch to another product within six months than women using ethinylestradiol + drospirenone. These findings may be of clinical importance when tailoring hormonal contraceptives on an individual basis.

## ARTICLE SUMMARY

### Article focus

- Continuation of contraceptive use is of utmost importance to avoid unintended pregnancies
- In Sweden, a change in prescription pattern has been observed, from combined oral contraceptives to progestin-only-pills, most probably due to media alarm
- Do continuation rates differ between different formulations of combined oral contraceptives?

### Key messages

- Users of progestin-only pills more frequently choose another hormonal contraceptive method, or discontinue use within six months, than users of combined oral contraceptives
- Users of drospirenone containing combined oral contraceptives were the least likely to switch method

### Strengths and limitations of this study

- The Swedish Prescribed Drug Register covers all drugs dispensed from all Swedish pharmacies since July 2005. Since sale information is transferred directly from the cashier to the register, data is complete and results in a high external validity for the register
- The large amount of data gives a high precision to the point estimates.
- We have not been able to control for discontinuation due to a wish to become pregnant.

## INTRODUCTION

Adherence to treatment and continuation of contraceptive use is crucial in the efforts to avoid unwanted pregnancies. Oral contraceptive (OC) use is however; generally characterized by relatively high discontinuation rates and low adherence to treatment(1). Reasons for discontinuation and poor adherence have been reported to be side effects but also the fear of side effects. Reported side effects include mood disturbances, decrease in libido, weight gain and poor bleeding control and the fear also includes the risk of venous thromboembolism (2, 3). Most of these reported side effects can be attributed to the progestogen component of the pill. Consequently, new progestogens with a potential of a more beneficial profile concerning side effects have been developed. Despite these improvements, discontinuation rates are still high.

A huge mass of studies has been performed, but there is only sparse evidence of differences in continuation rates between different types of hormonal contraceptives. Type of progestogen (4, 5), number of oral contraceptive pill packages dispensed (6), prescription drug or over the counter (7) have all been proposed as determinants for continuation. Moreover, improvements of the formulations of combined hormonal contraceptives (COC) have been made in order to increase continuation rates. Such improvements include new routes of administration and different regimens, i.e. mono-, bi-, tri-, and four -phasic pills, patches and vaginal rings (8, 9). So far, there is only limited evidence that use of a specific formulation or route of administration, would be a better choice concerning continuation rates (4-9).

In several Cochrane reviews concerning adherence and continuation rates, the authors have concluded that most studies are hampered either by design or by involvement of pharmaceutical companies and the results must therefore be interpreted with caution (4,5,10). Actually, there is still a great need for studies emphasizing continuation/discontinuation and the following risk of unintended pregnancies.

In Sweden, most contraceptives are prescribed by midwives. COC, progestin-only pills, implants, progestin-injectable (Depo-Provera<sup>®</sup>), hormonal-intruterine-system (Mirena<sup>®</sup>) but no combined hormonal injectable are available.

The prescription pattern in Sweden somewhat differs from most other countries as desogestrel-only pills have a very high market share and is the most commonly prescribed hormonal contraceptive. This is most probably an effect of media alarm and very cautious recommendations by the Swedish Medical Products Agency. Poor bleeding control is,

1  
2  
3 however, more common during POP-use and has been reported to be a common cause of  
4 discontinuation (2).  
5  
6  
7

8  
9 We hypothesised that switching product within six months is more common among  
10 desogestrel-only users compared to users of ethinylestradiol + levonorgestrel and that users of  
11 ethinylestradiol + drospirenonone are least prone to switch product within six months. The  
12 aim of the present study was to investigate if continuation rates in terms of repeated dispensed  
13 packages of the initially prescribed hormonal contraceptives differed between different  
14 formulations in a whole population. Secondly to measure if rates were related to prescribing  
15 categories, i.e. physicians and midwives.  
16  
17  
18  
19  
20  
21  
22  
23  
24  
25  
26  
27  
28  
29  
30  
31  
32  
33  
34  
35  
36  
37  
38  
39  
40  
41  
42  
43  
44  
45  
46  
47  
48  
49  
50  
51  
52  
53  
54  
55  
56  
57  
58  
59  
60

## METHODS

In this study, women identified as first-time users of hormonal contraceptives were treated as a cohort and followed for six months. Information on all women's prescribed and dispensed hormonal contraceptives from July 2005 to December 2010 was collected from the Swedish Prescribed Drug Register (11). The inclusion criteria for data extraction were: female born 1977-1994 with at least one dispensation of hormonal contraceptives at least once during the 5.5 year-period. The study population consisted of women without any dispensed hormonal contraceptive therapy in the 18 months between July 2005 - December 2006 but who had received at least one dispensation between January 2007-December 2009. This group was thus considered to be first-time users and constituted the study cohort in this study. Data from 2010 was used to identify those who had switched to a drug other than the first-dispensed drug after 2009 as well as those who had a second dispensation for the drug originally prescribed. Thus, 5.5 years data was used in this study.

The Swedish Prescribed Drug Register covers all drugs prescribed and dispensed for the entire Swedish population from June 2005 to the present. From this database we have obtained data on drugs having the Anatomical therapeutic chemical codes G03AA or G033AB (combined hormonal contraceptives) and G03AC (progestin only), from July 2005 to December 2010. We organized data by type for the three most common drugs, here referred to by their generic names: 1) ethinylestradiol + levonorgestrel, 2) ethinylestradiol + drospirenone and 3) desogestrel-only. The remaining hormonal contraceptives were placed in two other groups. The first, "Other oral contraceptives", included ethinylestradiol combined with either lynestrenol, norgestimat or desogestrel, and the progestin-only drugs norethisterone and lynestrenol). The second, "Other galenic forms", included intrauterine systems, transdermal patches, implants and injections. Although the correct designation for data from the Swedish Prescribed Drug Register is, "prescribed and dispensed" drugs, from now on the term used in this paper will be "dispensed" drugs.

### Statistical analysis

The number of women who received an initial hormonal contraceptive drug during the three-year period January 2007 - December 2009 is presented by drug type and age. The population was divided into four age groups: 16-19, 20-24, 25-28 and 16-28 years. The usage patterns are presented as numbers, percentages of total dispensations per product type and age group. Relative risks (RR) of either changing drug use or being prescribed the same drug were calculated together with 95% confidence intervals for each group of oral contraceptives, with



1  
2  
3 ethinylestradiol + levonorgestrel as the reference category. The CI tails were obtained using  
4 the normal distribution approximation and delta method to derive standard errors (12). Those  
5 who initially used long-acting contraceptive methods (intrauterine systems, implants and  
6 injections) were not included in the risk analysis since the results would not be relevant given  
7 the length of the period of data inclusion in this study.  
8  
9

10  
11 As the majority of hormonal contraceptives in Sweden are prescribed by midwives, the usage  
12 pattern is also described in relation to prescribers, physician or midwife. Measures carried out  
13 divided on prescriber categories were the prescription distribution in percent within each  
14 prescriber category, and within each product type. The percentages of first-time users who  
15 switched to a new drug within 6 months of receiving the first and of those who continued to  
16 use the first drug are presented in relation to prescriber category.  
17  
18  
19  
20  
21  
22  
23  
24  
25  
26  
27  
28  
29  
30  
31  
32  
33  
34  
35  
36  
37  
38  
39  
40  
41  
42  
43  
44  
45  
46  
47  
48  
49  
50  
51  
52  
53  
54  
55  
56  
57  
58  
59  
60

## RESULTS

The Swedish census data 2010 showed that there were 782 375 women born between 1977 and 1994. The number of women who had used hormonal contraceptives at least once between July 2005 and December 2010 was 578 009 (~74%). After excluding those women who had a dispensation of OC during the first 18 months of the period, 226 211 were considered to be first-time users and were thus included in the statistical analyses.

The dispensation pattern for first-time users was: ethinylestradiol + levonorgestrel (43.3%), desogestrel-only (24.4%), and ethinylestradiol + drospirenone (11.1%) (Table 1). The percentage of first-time users who switched to a different drug before six months had elapsed was 11.3%. The rate was highest for desogestrel-only (14.3%) and lowest for ethinylestradiol + drospirenone (6.6 %). The group for whom a different drug was most often dispensed consisted of those 16-19 years of age and this was true for all three drugs. The 25-28 years of age group showed the lowest rate of change. The continuation rate, i.e. having a repeated dispensation identical to the initial, was highest for ethinylestradiol + levonorgestrel (81.4%) and ethinylestradiol + drospirenone (81.2%). The continuation rate for desogestrel-only was lower (71.5%). The rate of change decreased with age. The RR of switching to a different contraceptive within the first six months was 1.35 (95% CI: 1.32-1.39) for desogestrel-only and 0.63 (0.59-0.66) for ethinylestradiol + drospirenone where ethinylestradiol + levonorgestrel was used as the reference category. Hence, women using ethinylestradiol + drospirenone had the lowest RR for changing to a different type of hormonal contraceptive while those using desogestrel-only had the highest. Further, comparisons between the three formulations show that desogestrel-only users not only had the highest RR for changing to a different type of hormonal contraceptive but also the lowest RR for having a second dispensation identical to the first. The RR did neither vary by age group for changing the type of hormonal contraceptive during the first 6 months nor for having a repeated dispensation identical to first.

The physicians and midwives displayed essentially the same pattern of prescribing the second prescription for first-time users. It is, however, worth noting that midwives prescribed the drug ethinylestradiol + drospirenone less often than physicians did. This drug was ranked as the fifth alternative choice for midwives and as the second alternative choice for physicians (in our five chosen groupings of hormonal contraceptives) (Table 2).

Table 1. Continuation rates in first time users of hormonal contraceptives in Sweden 2007-2009.

| Product type                       | Initial prescription and dispensation |        |            | Switching type before 6 months use |                    |               | Second prescription and dispensation identical to first |                     |                    |               |             |
|------------------------------------|---------------------------------------|--------|------------|------------------------------------|--------------------|---------------|---------------------------------------------------------|---------------------|--------------------|---------------|-------------|
|                                    | Age                                   | n      | % of total | n                                  | % per product type | Relative risk | (95% CI)                                                | n                   | % per product type | Relative risk | (95% CI)    |
| Ethinylestradiol + Levonorgestrel  | 16-19                                 | 73197  |            | 8234                               | 11.2               | 1 (reference) |                                                         | 60945               | 83.3               | 1 (reference) |             |
|                                    | 20-24                                 | 17140  |            | 1613                               | 9.4                |               |                                                         | 13158               | 76.8               |               |             |
|                                    | 25-28                                 | 7724   |            | 529                                | 6.8                |               |                                                         | 5692                | 73.7               |               |             |
|                                    | 16-28                                 | 98061  | 43.3       | 10376                              | 10.6               |               |                                                         | 79795               | 81.4               |               |             |
| Ethinylestradiol + Drospirenone    | 16-19                                 | 11604  |            | 952                                | 8.2                | 0.73          | (0.68-0.78)                                             | 9845                | 84.8               | 1.02          | (1.01-1.03) |
|                                    | 20-24                                 | 7889   |            | 433                                | 5.5                | 0.58          | (0.53-0.65)                                             | 6261                | 79.4               | 1.03          | (1.02-1.05) |
|                                    | 25-28                                 | 5655   |            | 279                                | 4.9                | 0.72          | (0.63-0.83)                                             | 4317                | 76.3               | 1.04          | (1.02-1.06) |
|                                    | 16-28                                 | 25148  | 11.1       | 1664                               | 6.6                | 0.63          | (0.59-0.66)                                             | 20423               | 81.2               | 1.00          | (0.99-1.00) |
| Desogestrel only                   | 16-19                                 | 29127  |            | 4977                               | 17.1               | 1.52          | (1.47-1.57)                                             | 21797               | 74.8               | 0.90          | (0.89-0.91) |
|                                    | 20-24                                 | 14172  |            | 1719                               | 12.1               | 1.29          | (1.21-1.37)                                             | 9657                | 68.1               | 0.89          | (0.88-0.90) |
|                                    | 25-28                                 | 11880  |            | 1206                               | 10.2               | 1.48          | (1.34-1.64)                                             | 7989                | 67.2               | 0.91          | (0.90-0.93) |
|                                    | 16-28                                 | 55179  | 24.4       | 7902                               | 14.3               | 1.35          | (1.32-1.39)                                             | 39443               | 71.5               | 0.88          | (0.87-0.88) |
| Other oral hormonal contraceptives | 16-28                                 | 23948  | 10.6       | 3016                               | 12.6               | 1.19          | (1.15-1.24)                                             | 18179               | 75.9               | 0.93          | (0.93-0.94) |
| Other galenic forms <sup>a</sup>   | 16-28                                 | 23875  | 10.6       |                                    |                    |               |                                                         |                     |                    |               |             |
| Total                              | 16-28                                 | 226211 | 100.0      | 22958 <sup>c</sup>                 | 11.3 <sup>c</sup>  |               |                                                         | 157840 <sup>c</sup> | 78.0 <sup>c</sup>  |               |             |

<sup>a</sup> intrauterine systems, transdermal patches, implants and injections

<sup>b</sup> irrelevant here as the treatment has long term effect

<sup>c</sup> excluding Other galenic forms

Table 2. Prescription and dispensation in first time users of hormonal contraceptives in Sweden 2007-2009 per product type and prescriber category together with continuation rates.

| Product type                       | Prescriber category | n      | Distribution within prescriber category % | Distribution within product type % | Switching type before 6 months use % | Second prescription and dispensation identical to first % |
|------------------------------------|---------------------|--------|-------------------------------------------|------------------------------------|--------------------------------------|-----------------------------------------------------------|
| Ethinylestradiol + levonorgestrel  | Midwife             | 83146  | 45.1                                      | 84.8                               | 10.9                                 | 82.1                                                      |
|                                    | Physician           | 14914  | 35.7                                      | 15.2                               | 8.8                                  | 77.4                                                      |
|                                    | All prescribers     | 98060  | 40.5                                      | 100.0                              | 10.6                                 | 81.4                                                      |
| Ethinylestradiol + drospirenone    | Midwife             | 16461  | 8.9                                       | 65.5                               | 7.0                                  | 83.3                                                      |
|                                    | Physician           | 8686   | 20.8                                      | 34.5                               | 5.8                                  | 77.2                                                      |
|                                    | All prescribers     | 25147  | 11.2                                      | 100.0                              | 6.6                                  | 81.2                                                      |
| Desogestrel only                   | Midwife             | 47035  | 25.5                                      | 85.2                               | 14.7                                 | 71.7                                                      |
|                                    | Physician           | 8139   | 19.5                                      | 14.8                               | 12.0                                 | 70.0                                                      |
|                                    | All prescribers     | 55174  | 25.6                                      | 100.0                              | 14.3                                 | 71.5                                                      |
| Other oral hormonal contraceptives | Midwife             | 19121  | 10.4                                      | 79.8                               | 12.9                                 | 76.8                                                      |
|                                    | Physician           | 4827   | 11.6                                      | 20.2                               | 11.2                                 | 72.4                                                      |
|                                    | All prescribers     | 23948  | 10.7                                      | 100.0                              | 12.6                                 | 75.9                                                      |
| All hormonal contraceptives        | Midwife             | 184446 | 100.0                                     | 81.5                               | 11.8                                 | 78.7                                                      |
|                                    | Physician           | 41758  | 100.0                                     | 18.5                               | 9.1                                  | 75.1                                                      |
|                                    | All prescribers     | 226204 | 100.0                                     | 100                                | 11.3                                 | 78.0                                                      |

## DISCUSSION

In this nationwide population-based cohort study we found that the most prescribed and dispensed hormonal contraceptives during the study period were COC containing ethinylestradiol + levonorgestrel, desogestrel-only and COC with ethinylestradiol + drospirenone. Women who received an initial prescription of ethinylestradiol combined with either levonorgestrel or drospirenone were more prone to continue with the same drug. On the contrary, women who received desogestrel-only as the initial prescribed and dispensed hormonal contraceptive had 35 % higher probability to choose another type of contraceptive within 6 months of use. Women who originally had received ethinylestradiol + drospirenone were the least likely to switch contraceptive drug during the same period of time.

The Swedish Medical Products Agency (MPA) recommends levonorgestrel containing combined pills as the first choice when prescribing oral contraceptives. Our results show that prescribers most often follow these recommendations. But, the prescription pattern in Sweden differs from most other countries as desogestrel-only pills have a high market share of approximately 25% (13) compared to 4,5% in Denmark and 0.3% in the United States (14, 15).

The clinical implications of our findings are important as side effects or other reasons for discontinuation or switching between different contraceptives increase the risk for unwanted pregnancies. Oral desogestrel-only contraceptives have become a common choice due to fear of the increased risk for venous thromboses in both women who use combined hormonal contraception and prescribers who use combined hormonal contraception. However, an irregular bleeding pattern which is more frequent among users of progestin-only formulations might be a reason for the higher percentage of switchers or discontinuation in this group. Therefore, when prescribing hormonal contraceptives it is necessary to thoroughly evaluate each woman's individual risk for venous thrombosis and also provide a balanced and knowledge based information on the size of these risks.

COCs are associated with a number of positive health effects, for example decreased menstrual blood loss and improvement in dysmenorrhoea and acne. It has previously been demonstrated that positive health effects in addition to the contraceptive effect most likely will increase continuation rates (16). This may very well contribute to the fact that women on COCs were more prone to continue use of the initial prescribed product as compared with women using POP, although the vast majority of women are prescribed COCs for contraception and not primarily for medical reasons..

We found that among midwives desogestrel-only was the second most common prescribed hormonal contraceptive. At the same time and especially among the youngest group of women, 16 – 19 years, the percentage of switchers was the highest.

1  
2  
3 Cerazette® (desogestrel 75µg) was registered in Sweden 2001 and the number of users, especially in the  
4 younger age categories increased rapidly during the following years. During the same time, the number of  
5 teenage abortions increased (17) and it can be speculated that the problem with bleeding control associated  
6 with progestin-only methods have led to lower continuation rates in this group of users and as a  
7 consequence an increased risk of unprotected intercourse leading to unwanted pregnancies.  
8

9  
10  
11 During the past five years there has been an intense debate concerning a possible difference in the  
12 thromboembolic risk between COC containing levonorgestrel- and drospirenone. Retrospective studies  
13 have found an increased risk in women using ethinylestradiol + drospirenone compared with  
14 ethinylestradiol + levonorgestrel (18-21). However these results have been contradicted by results from  
15 prospective studies (2225). When transforming results from this kind of studies into clinical  
16 recommendations, the question of continuation/discontinuation is crucial. A possible small increase in risk  
17 may be balanced by higher continuation rates. The results from the present study indicate a more  
18 favourable profile for COC containing drospirenone when it comes to continuation rates. To our best  
19 knowledge this has not previously been shown. A possible more favourable thromboembolic risk profile  
20 with a COC containing ethinylestradiol + levonorgestrel may be counteracted by lower continuation rates  
21 compared with pills containing drospirenone and a possible increased risk of unintended pregnancies. As  
22 the risk of venous thromboembolism increases rapidly already during early pregnancy this must be taken  
23 into account.  
24

25  
26  
27 A substantial number of women had no second dispensation in six months of any contraceptive product  
28 (table 1). The design of the present study does not provide any information on this group and we cannot  
29 draw any conclusions. We can, however, speculate that most probably the group is a mix of women  
30 stopping contraceptive use and women switching to a non-hormonal contraceptive method. The use of  
31 copper-IUDs is widespread in Sweden and the register used in this study does not provide information on  
32 copper-IUD use as this is not a pharmaceutical product. As COC with ethinylestradiol + drospirenone is  
33 second-line treatment in Sweden, it seems reasonable that this group is bigger. The actual number of  
34 women who discontinued without switching to a non-hormonal method is unknown.  
35

36  
37  
38 Some of the women considered as first time users actually could have been using the same contraceptive  
39 before the period of the study. For various reasons these women may have stopped their use and later on  
40 started again. This would most likely occur in the older age groups. If so, these women would be expected  
41 to have higher continuation rates than the younger women. As this is not the case (table 1), we do not  
42 consider this as a major source of bias.  
43  
44  
45  
46  
47  
48  
49  
50  
51  
52  
53  
54

### 55 56 57 58 **Strengths and limitations of the study** 59 60

1  
2  
3 The Swedish Prescribed Drug Register covers all drugs dispensed from all Swedish pharmacies since July  
4 2005. Since sale information is transferred directly from the cashier to the register, data is complete and  
5 results in a high external validity for the register.  
6

7  
8 A further strength is that the large amount of data gives a high precision to the point estimates. These  
9 factors are the usual strengths in register research together with avoidance of errors arising out of recall  
10 bias, which is a common problem arising when the data used have been collected from interviews and  
11 questionnaires.  
12

13  
14 We have not been able to control for a wish to become pregnant in this study. A lowered rate of “repeated  
15 prescription and dispensation identical to the first” may to some extent be an effect of plans to become  
16 pregnant. Therefore, the percentage rates for “repeated prescription and dispensation identical to the first”  
17 might be somewhat difficult to interpret. However, the RR estimates are useful since there is no reasonable  
18 explanation of the choice made by women to use desogestrel-only as an initial formulation to a greater  
19 extent because these women might be more prone to become pregnant.  
20  
21

## 22 **Conclusion**

23  
24 The three most common types of initially prescribed hormonal contraceptive in Sweden are from most to  
25 least common: ethinylestradiol + levonorgestrel (43.3 %), desogestrel-only (24.4 %) and ethinylestradiol +  
26 drospirenone (11.1 %). Of these drugs, desogestrel-only users were most likely to switch to another drug  
27 during the first six months with 14.3% changing. The RR for this type of change was 1.35, compared to  
28 ethinylestradiol + levonorgestrel. Women using drospirenone-containing COC were less likely to switch  
29 within six months than women using levonorgestrel-containing COC (RR 0.63; 0.59-0.66). The  
30 prescription pattern concerning the women’s continuation rates differed overall only slightly between the  
31 physicians’ and the midwives’, although there was a lowered prescription and dispensation rate of  
32 ethinylestradiol + drospirenone by midwives compared to physicians. These findings may be of clinical  
33 importance when tailoring hormonal contraceptives on an individual basis.  
34  
35  
36  
37  
38  
39  
40  
41  
42  
43  
44  
45  
46  
47  
48  
49  
50  
51  
52  
53  
54  
55  
56  
57  
58  
59  
60

## REFERENCES

1. Trussell J. Understanding contraceptive failure. *Best Pract Res Clin Obstet Gynaecol* 2009;23:199-209.
2. Lindh I, Blohm F, Andersson-Ellström E, Milsom I. Contraceptive use and pregnancy outcome in three generations of Swedish female teenagers from the same urban population. *Contraception* 2009;80: 163–169.
3. [Larsson M](#), [Tydén T](#), [Hanson U](#), [Häggström-Nordin E](#) Contraceptive use and associated factors among Swedish high school students. *Eur J Contracept Reprod Health Care* 2007;12:119-24.
4. [Lawrie TA](#), [Helmerhorst FM](#), [Maitra NK](#), [Kulier R](#), [Bloemenkamp K](#), [Gülmezoglu AM](#). Types of progestogens in combined oral contraception: effectiveness and side-effects. *Cochrane Database Syst Rev* 2011;11:CD004861.
5. [Maitra N](#), [Kulier R](#), [Bloemenkamp KW](#), [Helmerhorst FM](#), [Gülmezoglu AM](#). Progestogens in combined oral contraceptives for contraception. *Cochrane Database Syst Rev*. 2004;3:CD004861. Update in [Cochrane Database Syst Rev](#) 011;5:CD004861.
6. [Foster DG](#), [Parvataneni R](#), [de Bocanegra HT](#), [Lewis C](#), [Bradsberry M](#), [Darney P](#). Number of oral contraceptive pill packages dispensed, method continuation, and costs. *Obstet Gynecol* 2006;108:1107-14.
7. [Potter JE](#), [McKinnon S](#), [Hopkins K](#), [Amastae J](#), [Shedlin MG](#), [Powers DA](#), [Grossman D](#). Continuation of prescribed compared with over-the-counter oral contraceptives. *Obstet Gynecol* 2011;117:551-7.
8. [Sucato GS](#), [Land SR](#), [Murray PJ](#), [Cecchini R](#), [Gold MA](#). Adolescents' experiences using the contraceptive patch versus pills. *J Pediatr Adolesc Gynecol* 2011;24:197-203.
9. [Murphy PA](#), [Brixner D](#). Hormonal contraceptive discontinuation patterns according to formulation: investigation of associations in an administrative claims database. *Contraception* 2008;77:257-63
10. [Van Vliet HA](#), [Grimes DA](#), [Lopez LM](#), [Schulz KF](#), [Helmerhorst FM](#). Triphasic versus monophasic oral contraceptives for contraception. *Cochrane Database Syst Rev* 2011; 9:CD003553.
11. Wettermark B, Hammar N, Fored CM, Leimanis A, Otterblad Olausson P, Bergman U, Persson I, Sundström A, Westerholm B, Rosén M. The new Swedish Prescribed Drug Register-opportunities for pharmacoepidemiological research and experience from the first six months. *Pharmacoepidemiol Drug Saf* 2007;16:726-35.



12. Kirkwood BR, Sterne JAC, Essential Medical Statistics. Second ed. *Blackwell Science Ltd, Oxford*, 2003.
13. Swedish National Board of Health and Welfare;  
<http://www.socialstyrelsen.se/statistik/statistikdatabas>. Retrieved December 2012
14. Wilson NM, Laursen M, Lidegaard Ø. [Oral contraception in Denmark 1998-2010](#). *Acta Obstet Gynecol Scand*. 2012;91:810-5.
15. Hall KS, Trussell J, Schwarz EB. Progestin-only contraceptive pill use among women in the United States. *Contraception* 2012;86:653-8
16. Swedish National Board of Health and Welfare;  
<http://www.socialstyrelsen.se/statistik/statistikefteramne/aborter>. Retrieved November 2012
17. Robinson JC, Plichta S, Weisman CS, Nathanson CA, Ensminger M. Dysmenorrhea and use of oral contraceptives in adolescent women attending a family planning clinic. *Am J Obstet Gynecol*. 1992 Feb;166(2):578-83
18. Lidegaard O, Nielsen LH, Skovlund CW, Løkkegaard E. Venous thrombosis in users of non-hormonal contraception: follow-up study, Denmark 2001-10. *BMJ* 2012;344:e2990.
19. Jick SS, Hernandez RK. [Risk of non-fatal venous thromboembolism in women using oral contraceptives containing drospirenone compared with women using oral contraceptives containing levonorgestrel: case-control study using United States claims data](#). *BMJ* 2011;342:d2151. doi: 10.1136/bmj.d2151
20. [Parkin L](#), [Sharples K](#), [Hernandez RK](#), Jick SS. Risk of venous thromboembolism in users of oral contraceptives containing drospirenone or levonorgestrel: nested case-control study based on UK General Practice Research Database. *BMJ* 2011;342:d2139. doi: 10.1136/bmj.d2139.
21. Lidegaard Ø, [Milsom I](#), [Geirsson RT](#), [Skjeldestad FE](#). Hormonal contraception and venous thromboembolism. *Acta Obstet Gynecol Scand* 2012;9:769-78.
22. [Dinger JC](#), [Heinemann LA](#), [Kühl-Habich D](#). The safety of a drospirenone-containing oral contraceptive: final results from the European Active Surveillance Study on oral contraceptives based on 142,475 women-years of observation. *Contraception* 2007;75:344-54.

- 1  
2  
3 23. Dinger J, [Assmann A](#), [Möhner S](#), [Minh TD](#). Risk of venous thromboembolism and the use of  
4 dienogest- and drospirenone-containing oral contraceptives: results from a German case-control  
5 study. *J Fam Plann Reprod Health Care* 2010;36:123-9.  
6  
7  
8  
9 24. [Shapiro S](#), Dinger J. Risk of venous thromboembolism among users of oral contraceptives: a review  
10 of two recently published studies. *J Fam Plann Reprod Health Care* 2010;36:33-8.  
11  
12  
13 25. Dinger J, [Shapiro S](#). Combined oral contraceptives, venous thromboembolism, and the problem of  
14 interpreting large but incomplete datasets. *J Fam Plann Reprod Health Care* 2012;38:2-6  
15  
16  
17  
18  
19  
20  
21  
22  
23  
24  
25  
26  
27  
28  
29  
30  
31  
32  
33  
34  
35  
36  
37  
38  
39  
40  
41  
42  
43  
44  
45  
46  
47  
48  
49  
50  
51  
52  
53  
54  
55  
56  
57  
58  
59  
60

## CONTRIBUTORS

AJ and JB planned the study, supervised the analysis, interpreted the results, and wrote the manuscript. AJ is guarantor of the study.

ABW planned the study, prepared all data from the Swedish Prescribed Drug Register, made the statistical analyses and interpreted the results.

ML and AF interpreted the results, and revised the manuscript.

All authors discussed and approved the final manuscript.

AJ and JB decided when and where to attempt publication.

**Funding:** The expenses were covered by the County Council of Östergötland, Sweden.

**Competing interests:** All authors have completed the ICMJE uniform disclosure form at [www.icmje.org/coi\\_disclosure.pdf](http://www.icmje.org/coi_disclosure.pdf) (available on request from the corresponding author) and declare: no support from any organisation for the submitted work.

JB report financial relations to MSD Sweden and Bayer AB, Sweden (see attached declaration). The other investigators declared no financial relationships with any organisations that might have an interest in the submitted work in the previous three years, and no other relationships or activities that could appear to have influenced the submitted work.

**Ethical approval:** This study was approved by the Regional Ethical Review Board, Linköping, Sweden (Dnr M125-08).

**Data sharing:** No additional data available.

1  
2  
3  
4  
5  
6  
7  
8  
9  
10  
11  
12  
13  
14  
15  
16  
17  
18  
19  
20  
21  
22  
23  
24  
25  
26  
27  
28  
29  
30  
31  
32  
33  
34  
35  
36  
37  
38  
39  
40  
41  
42  
43  
44  
45  
46  
47  
48  
49  
50  
51  
52  
53  
54  
55  
56  
57  
58  
59  
60**What is already known on this topic**

Compliance and adherence to contraceptive use is almost always overestimated in clinical trials. Data on difference in compliance and adherence between different formulations of oral contraception is lacking or of poor quality. Knowledge of adherence and compliance is essential when it comes to avoid unintended pregnancies.

**What this study adds**

Users of progestin-only pills more frequently choose another hormonal contraceptive method or discontinue use within six months. Users of drospirenone containing combined oral contraceptives were the least likely to switch method. The results indicate a more favourable profile concerning adherence to treatment for drospirenone containing combined oral contraceptives. This may be of clinical interest when it comes to a decision of what type of oral contraceptives the individual woman should be recommended.

1  
2  
3  
4  
5  
6  
7 **Continuation rates of ~~Patterns of adherence to~~ oral hormonal**  
8 **contraceptives in a cohort of first time users: a population based registry**  
9 **study, Sweden 2005-2010**

11 Ann Josefsson Associate Professor, senior consultant<sup>1</sup>, Ann-Britt Wiréhn PhD, statistician<sup>1,2</sup>

13 Malou Lindberg Associate Professor<sup>2,3</sup>, Anniqa Foldemo PhD<sup>2,4</sup>, Jan Brynhildsen Associate  
15 Professor, senior consultant<sup>1</sup>

17 <sup>1</sup>Division of Obstetrics and Gynaecology, Department of Clinical and Experimental  
18 Medicine, Faculty of Health Sciences, Linköping University, Department of Obstetrics and  
19 Gynaecology in Linköping, County Council of Östergötland, Linköping, Sweden

21 <sup>2</sup>Local Health Care Research and Development Unit, County Council in Östergötland,  
22 Linköping, Sweden

24 <sup>3</sup>Department of Medical and Health Sciences, Primary Care, Linköping University,  
25 Linköping, Sweden

28 <sup>4</sup>Department of Medical and Health Sciences, Faculty of Health Sciences, Linköping  
29 University, Linköping, Sweden

33 Correspondence to:

35 ~~Jan Brynhildsen~~Ann Josefsson, Division of Obstetrics and Gynaecology,

36 Linköping University, Faculty of Health Sciences,

37 University Hospital,

38 SE-58185, Linköping, Sweden

41 [jan.brynhildsenann.josefsson@lio.se](mailto:jan.brynhildsenann.josefsson@lio.se)

43 [Tel: +46 10 1030000](tel:+46101030000)

45 Fax: +46 13 14 81 56

47  
48  
49 The Corresponding Author has the right to grant on behalf of all authors and does grant on  
50 behalf of all authors, an exclusive licence on a worldwide basis to the BMJ Publishing Group  
51 Ltd to permit this article (if accepted) to be published in BMJ editions and any other  
52 BMJPGJL products and sublicences such use and exploit all subsidiary rights, as set out in our  
53  
54

1  
2  
3  
4  
5  
6  
7  
8  
9  
10  
11  
12  
13  
14  
15  
16  
17  
18  
19  
20  
21  
22  
23  
24  
25  
26  
27  
28  
29  
30  
31  
32  
33  
34  
35  
36  
37  
38  
39  
40  
41  
42  
43  
44  
45  
46  
47  
48  
49  
50  
51  
52  
53  
54  
55  
56  
57  
58  
59  
60

licence.

**Key words:** Hormonal contraceptives; Oral contraceptives; Patient adherence; Registries ;  
Follow-up studies

**Word count:**

For peer review only

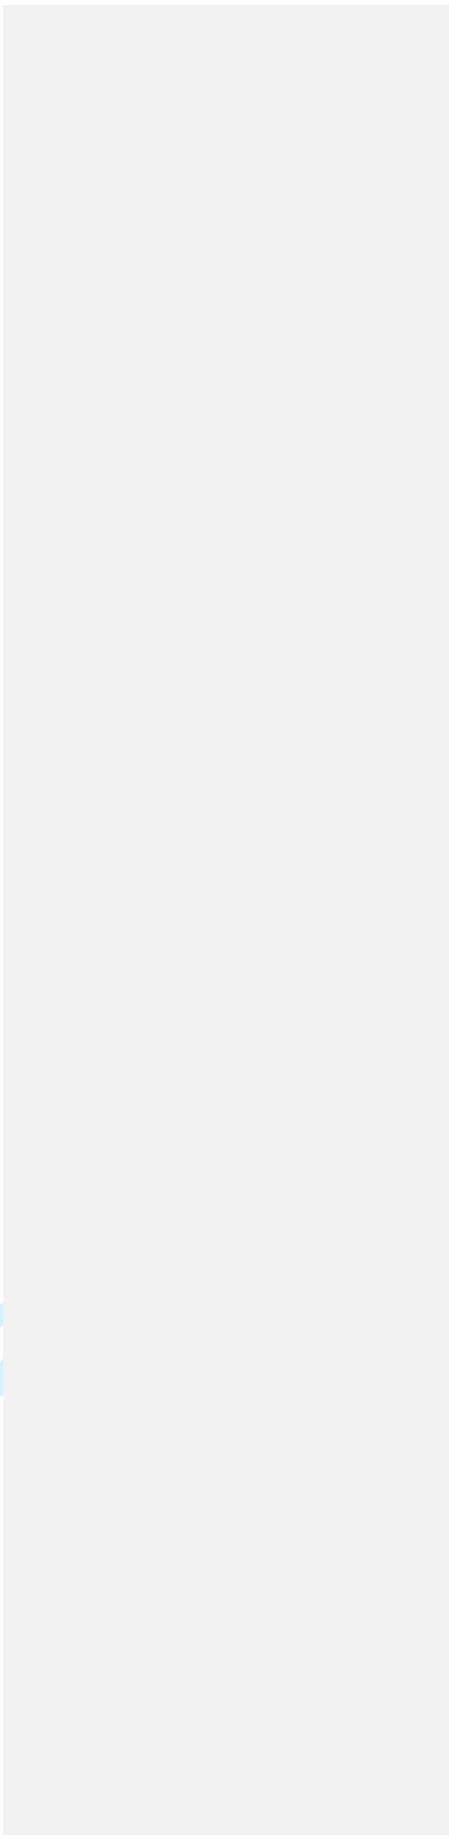

## ABSTRACT

**Objective** To investigate if continuation rates in first-time users of oral hormonal contraceptives differed between different formulations and to measure if rates were related to prescribing categories, i.e. physicians and midwives.

**Design** A longitudinal national population-based registry study

**Setting** The Swedish prescribed drug register

**Participants** All females born 1977-1994 defined as first-time users of hormonal contraceptives from 2007 to 2009 (n = 226 211).

**Main outcome measures** Tendency to switch type of hormonal contraceptive within 6 months use and repeated dispensation identical to first were estimated as percentages and relative risks. Physicians' and midwives' prescription patterns concerning the women's continuation rates of oral hormonal contraceptive type.

**Results** In Sweden there were 782 375 women born 1977-1994 at the time of the study. Of these, 226 211 women were identified as first-time users of hormonal contraceptives. Ethinylestradiol + levonorgestrel, desogestrel-only and ethinylestradiol + drospirenone were the hormonal contraceptives most commonly dispensed for first-time users, 43.3 %, 24.4 % and 11.1 %, respectively. The overall rate of switching contraceptive type in the first six months was 11.3%, highest for desogestrel-only (14.3%) and lowest for ethinylestradiol + drospirenone (6.6 %). The switching rate for all three products was highest in 16-19 year age group. Having a repeated dispensation identical to the initial was highest for users of ethinylestradiol either combined with levonorgestrel or drospirenone, 81.4% and 81.2% respectively, whereas this rate for the initial desogestrel-only users was 71.5%. The RR of switching of contraceptive type within the first six months was 1.35 (95% CI: 1.32-1.39) for desogestrel-only and 0.63 (0.59-0.66) for ethinylestradiol + drospirenone compared to ethinylestradiol + levonorgestrel as reference category. The physicians' and midwives' prescription patterns concerning the women's continuation rates differed only slightly.

**Conclusion** Desogestrel-only users conferred the highest switcher rate to another hormonal contraceptive within a 6-months period. Users of ethinylestradiol + levonorgestrel were more prone to switch to another product within six months than women using ethinylestradiol + drospirenone. These findings may be of clinical importance when tailoring hormonal contraceptives on an individual basis.

## ARTICLE SUMMARY

### Article focus

- Continuation of ~~Compliance and adherence to~~ contraceptive uses is of outmost importance to avoid unintended pregnancies
- In Sweden, a change in prescription pattern has been observed, from combined oral contraceptives to progestin-only-pills, most probably due to media alarm
- Do continuation rates ~~adherence to treatment~~ differ between different formulations of combined oral contraceptives?

### Key messages

- Users of progestin-only pills more frequently choose another hormonal contraceptive method, or discontinue use within six months, than users of combined oral contraceptives
- Users of drospirenone containing combined oral contraceptives were the least likely to switch method

### Strengths and limitations of this study

- The Swedish Prescribed Drug Register covers all drugs dispensed from all Swedish pharmacies since July 2005. Since sale information is transferred directly from the cashier to the register, data is complete and results in a high external validity for the register
- The large amount of data gives a high precision to the point estimates.
- We have not been able to control for discontinuation due to a wish to become pregnant.



## INTRODUCTION

~~Adherence to treatment~~ ~~Compliance~~ and continuation of contraceptive use is crucial in the efforts to avoid unwanted pregnancies. Oral contraceptive (OC) use is however; generally characterized by ~~poor compliance, relatively high discontinuation rates and~~ low adherence ~~to treatment and relatively high discontinuation rates~~ (1). Reasons for ~~discontinuation and~~ poor adherence ~~and discontinuation~~ have been reported to be side effects but also the fear of side effects. Reported side effects include mood disturbances, decrease in libido, weight gain and poor bleeding control and the fear also includes the risk of venous thromboembolism (2, 3). Most of these reported side effects can be attributed to the progestogen component of the pill. Consequently, new progestogens with a potential of a more beneficial profile concerning side effects have been developed. Despite these improvements, discontinuation rates are still high.

A huge mass of studies has been performed, but there is only sparse evidence of differences in continuation rates between different types of -hormonal contraceptives. Type of progestogen (4, 5), number of oral contraceptive pill packages dispensed (6), prescription drug or over the counter (7) have all been proposed as determinants for continuation. Moreover, improvements of the formulations of combined hormonal contraceptives (COC) have been made in order to increase ~~continuation rates~~ ~~adherence~~. Such improvements include new routes of administration and different regimens, i.e. mono-, bi-, tri-, and four -phasic pills, patches and vaginal rings (8, 9). So far, there is only limited evidence that use of a specific formulation or route of administration, would be a better choice concerning continuation rates (4-9).

In several Cochrane reviews ~~concerning adherence and continuation rates~~, the authors have concluded that most studies are hampered either by design or by involvement of pharmaceutical companies and the results must therefore be interpreted with caution (4,5,10).

Actually, there is still a great need for studies emphasizing continuation/discontinuation ~~and risks of poor compliance~~ and ~~the following as a consequence a~~ risk of unintended pregnancies.

~~In Sweden, most contraceptives are prescribed by midwives. COC, progestin-only pills, implants, progestin-injectable (Depo-Provera<sup>®</sup>), hormonal-intruterine-system (Mirena<sup>®</sup>) but no combined hormonal injectable are available.~~

~~The prescription pattern in Sweden somewhat differs from most other countries as desogestrel-only pills have a very high market share and is the most commonly prescribed hormonal contraceptive. This is most probably an effect of media alarm and very cautious~~

Formatted: No underline, Font color: Auto, Not Highlight

Formatted: Not Highlight

Formatted: No underline, Font color: Auto, Not Highlight

1  
2  
3  
4  
5  
6  
7  
8  
9  
10  
11  
12  
13  
14  
15  
16  
17  
18  
19  
20  
21  
22  
23  
24  
25  
26  
27  
28  
29  
30  
31  
32  
33  
34  
35  
36  
37  
38  
39  
40  
41  
42  
43  
44  
45  
46  
47  
48  
49  
50  
51  
52  
53  
54  
55  
56  
57  
58  
59  
60

recommendations by the Swedish Medical Products Agency. Poor bleeding control is, however, more common during POP-use and has been reported to be a common cause of discontinuation (2).

**Formatted:** No underline, Font color: Auto, Not Highlight

We hypothesised that switching product within six months is more common among desogestrel-only users compared to users of etinylestradiol + levonorgestrel and that users of ethinylestradiol + drospirenonone are least prone to switch product within six months. The aim of the present study was to investigate if continuation rates in terms of repeated dispensed packages of the initially prescribed hormonal contraceptives differed between different formulations in a whole population. Secondly to measure if rates were related to prescribing categories, i.e. physicians and midwives.

## METHODS

In this study, women identified as first-time users of hormonal contraceptives were treated as a cohort and followed for six months. Information on all women's prescribed and dispensed hormonal contraceptives from July 2005 to December 2010 was collected from the Swedish Prescribed Drug Register (11). The inclusion criteria for data extraction were: female born 1977-1994 with at least one dispensation of hormonal contraceptives at least once during the 5.5 year-period. The study population consisted of women without any dispensed hormonal contraceptive therapy in the 18 months between July 2005 - December 2006 but who had received at least one dispensation between January 2007-December 2009. This group was thus considered to be first-time users and constituted the study cohort in this study. Data from 2010 was used to identify those who had switched to a drug other than the first-dispensed drug after 2009 as well as those who had a second dispensation for the drug originally prescribed. Thus, 5.5 years data was used in this study.

The Swedish Prescribed Drug Register covers all drugs prescribed and dispensed for the entire Swedish population from June 2005 to the present. From this database we have obtained data on drugs having the Anatomical therapeutic chemical codes G03AA or G033AB (combined hormonal contraceptives) and G03AC (progestin only), from July 2005 to December 2010. We organized data by type for the three most common drugs, here referred to by their generic names: 1) ethinylestradiol + levonorgestrel, 2) ethinylestradiol + drospirenone and 3) desogestrel-only. The remaining hormonal contraceptives were placed in two other groups. The first, "Other oral contraceptives", included ethinylestradiol combined with either lynestrenol, norgestimat or desogestrel, and the progestin-only drugs norethisterone and lynestrenol). The second, "Other galenic forms", included intrauterine systems, transdermal patches, implants and injections. Although the correct designation for data from the Swedish Prescribed Drug Register is, "prescribed and dispensed" drugs, from now on the term used in this paper will be "dispensed" drugs.

### Statistical analysis

The number of women who received an initial hormonal contraceptive drug during the three-year period January 2007 - December 2009 is presented by drug type and age. The population was divided into four age groups: 16-19, 20-24, 25-28 and 16-28 years. The usage patterns are presented as numbers, percentages of total dispensations per product type and age group. Relative risks (RR) of either changing drug use or being prescribed the same drug were

1  
2  
3  
4  
5  
6  
7  
8  
9  
10  
11  
12  
13  
14  
15  
16  
17  
18  
19  
20  
21  
22  
23  
24  
25  
26  
27  
28  
29  
30  
31  
32  
33  
34  
35  
36  
37  
38  
39  
40  
41  
42  
43  
44  
45  
46  
47  
48  
49  
50  
51  
52  
53  
54  
55  
56  
57  
58  
59  
60

calculated together with 95% confidence intervals for each group of oral contraceptives, with ethinylestradiol + levonorgestrel as the reference category. The CI tails were obtained using the normal distribution approximation and delta method to derive standard errors (12). Those who initially used long-acting contraceptive methods (intrauterine systems, implants and injections) were not included in the risk analysis since the results would not be relevant given the length of the period of data inclusion in this study.

As the majority of hormonal contraceptives in Sweden are prescribed by midwives, the usage pattern is also described in relation to prescribers, physician or midwife. Measures carried out divided on prescriber categories were the prescription distribution in percent within each prescriber category, and within each product type. The percentages of first-time users who switched to a new drug within 6 months of receiving the first and of those who continued to use the first drug are presented in relation to prescriber category.

## RESULTS

The Swedish census data 2010 showed that there were 782 375 women born between 1977 and 1994. The number of women who had used hormonal contraceptives at least once between July 2005 and December 2010 was 578 009 (~74%). After excluding those women who had a dispensation of OC during the first 18 months of the period, 226 211 were considered to be first-time users and were thus included in the statistical analyses.

The dispensation pattern for first-time users was: ethinylestradiol + levonorgestrel (43.3%), desogestrel-only (24.4%), and ethinylestradiol + drospirenone (11.1%) (Table 1). The percentage of first-time users who switched to a different drug before six months had elapsed was 11.3%. The rate was highest for desogestrel-only (14.3%) and lowest for ethinylestradiol + drospirenone (6.6 %). The group for whom a different drug was most often dispensed consisted of those 16-19 years of age and this was true for all three drugs. The 25-28 years of age group showed the lowest rate of change. The continuation rate, i.e. having a repeated dispensation identical to the initial, was highest for ethinylestradiol + levonorgestrel (81.4%) and ethinylestradiol + drospirenone (81.2%). The continuation rate for desogestrel-only was lower (71.5%). The rate of change decreased with age. The RR of switching to a different contraceptive within the first six months was 1.35 (95% CI: 1.32-1.39) for desogestrel-only and 0.63 (0.59-0.66) for ethinylestradiol + drospirenone where ethinylestradiol + levonorgestrel was used as the reference category. Hence, women using ethinylestradiol + drospirenone had the lowest RR for changing to a different type of hormonal contraceptive while those using desogestrel-only had the highest. Further, comparisons between the three formulations show that desogestrel-only users not only had the highest RR for changing to a different type of hormonal contraceptive but also the lowest RR for having a second dispensation identical to the first. The RR did neither vary by age group for changing the type of hormonal contraceptive during the first 6 months nor for having a repeated dispensation identical to first.

The physicians and midwives displayed essentially the same pattern of prescribing the second prescription for first-time users. It is, however, worth noting that midwives prescribed the drug ethinylestradiol + drospirenone less often than physicians did. This drug was ranked as the fifth alternative choice for midwives and as the second alternative choice for physicians (in our five chosen groupings of hormonal contraceptives) (Table 2).

1  
2  
3  
4  
5  
6  
7  
8  
9  
10  
11  
12  
13  
14  
15  
16  
17  
18  
19  
20  
21  
22  
23  
24  
25  
26  
27  
28  
29  
30  
31  
32  
33  
34  
35  
36  
37  
38  
39  
40  
41  
42  
43  
44  
45  
46  
47  
48  
49

Table 1. Continuation rates in first time users of hormonal contraceptives in Sweden 2007-2009.

| Product type                       | Initial prescription and dispensation |        |            | Switching type before 6 months use |                    |               |             | Second prescription and dispensation identical to first |                    |               |             |
|------------------------------------|---------------------------------------|--------|------------|------------------------------------|--------------------|---------------|-------------|---------------------------------------------------------|--------------------|---------------|-------------|
|                                    | Age                                   | n      | % of total | n                                  | % per product type | Relative risk | (95% CI)    | n                                                       | % per product type | Relative risk | (95% CI)    |
| Ethinylestradiol + Levonorgestrel  | 16-19                                 | 73197  |            | 8234                               | 11.2               | 1 (reference) |             | 60945                                                   | 83.3               | 1 (reference) |             |
|                                    | 20-24                                 | 17140  |            | 1613                               | 9.4                |               |             | 13158                                                   | 76.8               |               |             |
|                                    | 25-28                                 | 7724   |            | 529                                | 6.8                |               |             | 5692                                                    | 73.7               |               |             |
|                                    | 16-28                                 | 98061  | 43.3       | 10376                              | 10.6               |               |             | 79795                                                   | 81.4               |               |             |
| Ethinylestradiol + Drospirenone    | 16-19                                 | 11604  |            | 952                                | 8.2                | 0.73          | (0.68-0.78) | 9845                                                    | 84.8               | 1.02          | (1.01-1.03) |
|                                    | 20-24                                 | 7889   |            | 433                                | 5.5                | 0.58          | (0.53-0.65) | 6261                                                    | 79.4               | 1.03          | (1.02-1.05) |
|                                    | 25-28                                 | 5655   |            | 279                                | 4.9                | 0.72          | (0.63-0.83) | 4317                                                    | 76.3               | 1.04          | (1.02-1.06) |
|                                    | 16-28                                 | 25148  | 11.1       | 1664                               | 6.6                | 0.63          | (0.59-0.66) | 20423                                                   | 81.2               | 1.00          | (0.99-1.00) |
| Desogestrel only                   | 16-19                                 | 29127  |            | 4977                               | 17.1               | 1.52          | (1.47-1.57) | 21797                                                   | 74.8               | 0.90          | (0.89-0.91) |
|                                    | 20-24                                 | 14172  |            | 1719                               | 12.1               | 1.29          | (1.21-1.37) | 9657                                                    | 68.1               | 0.89          | (0.88-0.90) |
|                                    | 25-28                                 | 11880  |            | 1206                               | 10.2               | 1.48          | (1.34-1.64) | 7989                                                    | 67.2               | 0.91          | (0.90-0.93) |
|                                    | 16-28                                 | 55179  | 24.4       | 7902                               | 14.3               | 1.35          | (1.32-1.39) | 39443                                                   | 71.5               | 0.88          | (0.87-0.88) |
| Other oral hormonal contraceptives | 16-28                                 | 23948  | 10.6       | 3016                               | 12.6               | 1.19          | (1.15-1.24) | 18179                                                   | 75.9               | 0.93          | (0.93-0.94) |
| Other galenic forms <sup>a</sup>   | 16-28                                 | 23875  | 10.6       |                                    |                    |               |             |                                                         |                    |               |             |
| Total                              | 16-28                                 | 226211 | 100.0      | 22958 <sup>c</sup>                 | 11.3 <sup>c</sup>  |               |             | 157840 <sup>c</sup>                                     | 78.0 <sup>c</sup>  |               |             |

<sup>a</sup> intrauterine systems, transdermal patches, implants and injections  
<sup>b</sup> irrelevant here as the treatment has long term effect  
<sup>c</sup> excluding Other galenic forms

Table 2. Prescription and dispensation in first time users of hormonal contraceptives in Sweden 2007-2009 per product type and prescriber category together with continuation rates.

| Product type                       | Prescriber category | n      | Distribution within prescriber category % | Distribution within product type % | Switching type before 6 months use % | Second prescription and dispensation identical to first % |
|------------------------------------|---------------------|--------|-------------------------------------------|------------------------------------|--------------------------------------|-----------------------------------------------------------|
| Ethinylestradiol + levonorgestrel  | Midwife             | 83146  | 45.1                                      | 84.8                               | 10.9                                 | 82.1                                                      |
|                                    | Physician           | 14914  | 35.7                                      | 15.2                               | 8.8                                  | 77.4                                                      |
|                                    | All prescribers     | 98060  | 40.5                                      | 100.0                              | 10.6                                 | 81.4                                                      |
| Ethinylestradiol + drospirenone    | Midwife             | 16461  | 8.9                                       | 65.5                               | 7.0                                  | 83.3                                                      |
|                                    | Physician           | 8686   | 20.8                                      | 34.5                               | 5.8                                  | 77.2                                                      |
|                                    | All prescribers     | 25147  | 11.2                                      | 100.0                              | 6.6                                  | 81.2                                                      |
| Desogestrel only                   | Midwife             | 47035  | 25.5                                      | 85.2                               | 14.7                                 | 71.7                                                      |
|                                    | Physician           | 8139   | 19.5                                      | 14.8                               | 12.0                                 | 70.0                                                      |
|                                    | All prescribers     | 55174  | 25.6                                      | 100.0                              | 14.3                                 | 71.5                                                      |
| Other oral hormonal contraceptives | Midwife             | 19121  | 10.4                                      | 79.8                               | 12.9                                 | 76.8                                                      |
|                                    | Physician           | 4827   | 11.6                                      | 20.2                               | 11.2                                 | 72.4                                                      |
|                                    | All prescribers     | 23948  | 10.7                                      | 100.0                              | 12.6                                 | 75.9                                                      |
| All hormonal contraceptives        | Midwife             | 184446 | 100.0                                     | 81.5                               | 11.8                                 | 78.7                                                      |
|                                    | Physician           | 41758  | 100.0                                     | 18.5                               | 9.1                                  | 75.1                                                      |
|                                    | All prescribers     | 226204 | 100.0                                     | 100                                | 11.3                                 | 78.0                                                      |

## DISCUSSION

In this nationwide population-based cohort study we found that the most prescribed and dispensed hormonal contraceptives during the study period were COC containing ethinylestradiol + levonorgestrel, desogestrel-only and COC with ethinylestradiol + drospirenone. Women who received an initial prescription of ethinylestradiol combined with either levonorgestrel or drospirenone were more prone to continue with the same drug. On the contrary, women who received desogestrel-only as the initial prescribed and dispensed hormonal contraceptive had 35 % higher probability to choose another type of contraceptive within 6 months of use. Women who originally had received ethinylestradiol + drospirenone were the least likely to switch contraceptive drug during the same period of time.

The Swedish Medical Products Agency (MPA) recommends levonorgestrel containing combined pills as the first choice when prescribing oral contraceptives. Our results show that prescribers most often follow these recommendations. But, the prescription pattern in Sweden differs from most other countries as desogestrel-only pills have a high market share of approximately 25% (13) compared to 4,5% in Denmark and 0.3% in the United States (14, 15).

The clinical implications of our findings are important as side effects or other reasons for discontinuation or switching between different contraceptives increase the risk for unwanted pregnancies. Oral desogestrel-only contraceptives have become a common choice due to fear of the increased risk for venous thromboses in both women who use combined hormonal contraception and prescribers who use combined hormonal contraception. However, an irregular bleeding pattern which is more frequent among users of progestin-only formulations might be a reason for the higher percentage of switchers or discontinuation in this group. Therefore, when prescribing hormonal contraceptives it is necessary to thoroughly evaluate each woman's individual risk for venous thrombosis and also provide a balanced and knowledge based information on the size of these risks.

COCs are associated with a number of positive health effects, for example decreased menstrual blood loss and improvement in dysmenorrhoea and acne. It has previously been demonstrated that positive health effects in addition to the contraceptive effect most likely will increase continuation rates (16). This may very well contribute to the fact that women on COCs were more prone to continue use of the initial prescribed product as compared with women using POP, although the vast majority of women are prescribed COCs for contraception and not primarily for medical reasons.

We found that among midwives desogestrel-only was the second most common prescribed hormonal contraceptive. At the same time and especially among the youngest group of women, 16 – 19 years, the percentage of switchers was the highest.

Formatted: Left: 0.55", Right: 0.55", Top: 0.98", Bottom: 0.98", Width: 8.26", Height: 11.69"



1  
2  
3  
4  
5  
6  
7  
8 Cerazette® (desogestrel 75µg) was registered in Sweden 2001 and the number of users, especially in the  
9 younger age categories increased rapidly during the following years. During the same time, the number of  
10 teenage abortions increased (176) and it can be speculated that the problem with bleeding control  
11 associated with progestin-only methods have ~~leadled~~ to lower continuation rates poorer compliance in this  
12 group of users and as a consequence an increased risk of unprotected intercourse leading to unwanted  
13 pregnancies.  
14

15  
16 During the past five years there has been an intense debate concerning a possible difference in the  
17 thromboembolic risk between COC containing levonorgestrel- and drospirenone. Retrospective studies  
18 have found an increased risk in women using ethinylestradiol + drospirenone compared with  
19 ethinylestradiol + levonorgestrel (187-210). However these results have been contradicted by results from  
20 prospective studies (212-254). When transforming results from this kind of studies into clinical  
21 recommendations, the question of continuation/discontinuation adherence and compliance is crucial. A  
22 possible small increase in risk may be balanced by higher continuation rates a better adherence to  
23 treatment. The results from the present study indicate a more favourable profile for COC containing  
24 drospirenone when it comes to -continuation rates adherence and compliance. To our best knowledge this  
25 has not previously been shown. A possible more favourable thromboembolic risk profile with a COC  
26 containing ethinylestradiol + levonorgestrel may be counteracted by alower continuation rates poorer  
27 adherence compared with pills containing drospirenone and a possible increased risk of unintended  
28 pregnancies. As the risk of venous thromboembolism increases rapidly already during early pregnancy this  
29 must be taken into account.  
30

31  
32  
33  
34  
35  
36 A substantial number of women had no second dispensation in six months of any contraceptive product  
37 (table 1). The design of the present study does not provide any information on this group and we cannot  
38 draw any conclusions. We can, however, speculate that most probably the group is a mix of women  
39 stopping contraceptive use and women switching to a non-hormonal contraceptive method. The use of  
40 copper-IUDs is widespread in Sweden and the register used in this study does not provide information on  
41 copper-IUD use as this is not a pharmaceutical product. As COC with ethinylestradiol + drospirenone is  
42 second-line treatment in Sweden, it seems reasonable that this group is bigger. The actual number of  
43 women who discontinued without switching to a non-hormonal method is unknown.  
44

45  
46  
47 Some of the women considered as first time users actually could have been using the same contraceptive  
48 before the period of the study. For various reasons these women may have stopped their use and later on  
49 started again. This would most likely occur in the older age groups. If so, these women would be expected  
50 to have higher continuation rates than the younger women. As this is not the case (table 1), we do not  
51 consider this as a major source of bias.  
52  
53  
54

### Strengths and limitations of the study

The Swedish Prescribed Drug Register covers all drugs dispensed from all Swedish pharmacies since July 2005. Since sale information is transferred directly from the cashier to the register, data is complete and results in a high external validity for the register.

A further strength is that the large amount of data gives a high precision to the point estimates. These factors are the usual strengths in register research together with avoidance of errors arising out of recall bias, which is a common problem arising when the data used have been collected from interviews and questionnaires.

We have not been able to control for a wish to become pregnant in this study. A lowered rate of “repeated prescription and dispensation identical to the first” may to some extent be an effect of plans to become pregnant. Therefore, the percentage rates for “repeated prescription and dispensation identical to the first” might be somewhat difficult to interpret. However, the RR estimates are useful since there is no reasonable explanation of the choice made by women to use desogestrel-only as an initial formulation to a greater extent because these women might be more prone to become pregnant.

### Conclusion

The three most common types of initially prescribed hormonal contraceptive in Sweden are from most to least common: ethinylestradiol + levonorgestrel (43.3 %), desogestrel-only (24.4 %) and ethinylestradiol + drospirenone (11.1 %). Of these drugs, desogestrel-only users were most likely to switch to another drug during the first six months with 14.3% changing. The RR for this type of change was 1.35, compared to ethinylestradiol + levonorgestrel. Women using drospirenone-containing COC were less likely to switch within six months than women using levonorgestrel-containing COC (RR 0.63; 0.59-0.66). The prescription pattern concerning the women’s continuation rates differed overall only slightly between the physicians’ and the midwives’, although there was a lowered prescription and dispensation rate of ethinylestradiol + drospirenone by midwives compared to physicians. These findings may be of clinical importance when tailoring hormonal contraceptives on an individual basis.

## REFERENCES

1. Trussell J. Understanding contraceptive failure. *Best Pract Res Clin Obstet Gynaecol* 2009;23:199-209.
2. Lindh I, Blohm F, Andersson-Ellström E, Milsom I. Contraceptive use and pregnancy outcome in three generations of Swedish female teenagers from the same urban population. *Contraception* 2009;80: 163–169.
3. [Larsson M](#), [Tydén T](#), [Hanson U](#), [Häggström-Nordin E](#) Contraceptive use and associated factors among Swedish high school students. *Eur J Contracept Reprod Health Care* 2007;12:119-24.
4. [Lawrie TA](#), [Helmerhorst FM](#), [Maitra NK](#), [Kulier R](#), [Bloemenkamp K](#), [Gülmezoglu AM](#). Types of progestogens in combined oral contraception: effectiveness and side-effects. *Cochrane Database Syst Rev* 2011;11:CD004861.
5. [Maitra N](#), [Kulier R](#), [Bloemenkamp KW](#), [Helmerhorst FM](#), [Gülmezoglu AM](#). Progestogens in combined oral contraceptives for contraception. *Cochrane Database Syst Rev*. 2004;3:CD004861. Update in [Cochrane Database Syst Rev 011;5:CD004861.](#)
6. [Foster DG](#), [Parvataneni R](#), [de Bocanegra HT](#), [Lewis C](#), [Bradsberry M](#), [Darney P](#). Number of oral contraceptive pill packages dispensed, method continuation, and costs. *Obstet Gynecol* 2006;108:1107-14.
7. [Potter JE](#), [McKinnon S](#), [Hopkins K](#), [Amastae I](#), [Shedlin MG](#), [Powers DA](#), [Grossman D](#). Continuation of prescribed compared with over-the-counter oral contraceptives. *Obstet Gynecol* 2011;117:551-7.
8. [Sucato GS](#), [Land SR](#), [Murray PJ](#), [Cecchini R](#), [Gold MA](#). Adolescents' experiences using the contraceptive patch versus pills. *J Pediatr Adolesc Gynecol* 2011;24:197-203.
9. [Murphy PA](#), [Brixner D](#). Hormonal contraceptive discontinuation patterns according to formulation: investigation of associations in an administrative claims database. *Contraception* 2008;77:257-63
10. [Van Vliet HA](#), [Grimes DA](#), [Lopez LM](#), [Schulz KF](#), [Helmerhorst FM](#). Triphasic versus monophasic oral contraceptives for contraception. *Cochrane Database Syst Rev* 2011; 9;:CD003553.
11. Wettermark B, Hammar N, Fored CM, Leimanis A, Otterblad Olausson P, Bergman U, Persson I, Sundström A, Westerholm B, Rosén M. The new Swedish Prescribed Drug Register-opportunities for pharmacoepidemiological research and experience from the first six months. *Pharmacoepidemiol Drug Saf* 2007;16:726-35.

Formatted: English (U.K.)

Formatted: English (U.K.)

Field Code Changed

Formatted: Swedish (Sweden)

Formatted: Swedish (Sweden)

Formatted: Swedish (Sweden)

Field Code Changed

Formatted: Swedish (Sweden)

Formatted: Swedish (Sweden)

Field Code Changed

Formatted: Swedish (Sweden)

Field Code Changed

Formatted: Swedish (Sweden)

Formatted: Swedish (Sweden)

Field Code Changed

12. Kirkwood BR, Sterne JAC, Essential Medical Statistics. Second ed. *Blackwell Science Ltd, Oxford*, 2003.

13. Swedish National Board of Health and Welfare; <http://www.socialstyrelsen.se/statistik/statistikdatabas>. Retrieved December 2012

14. Wilson NM, Laursen M, Lidegaard Ø. [Oral contraception in Denmark 1998-2010](#). *Acta Obstet Gynecol Scand*. 2012;91:810-5.

Field Code Changed

15. Hall KS, Trussell J, Schwarz EB. Progestin-only contraceptive pill use among women in the United States. *Contraception* 2012;86:653-8

16. Swedish National Board of Health and Welfare;

<http://www.socialstyrelsen.se/statistik/statistikefteramne/aborter>. Retrieved November 2012

Field Code Changed

17. Robinson JC, Plichta S, Weisman CS, Nathanson CA, Ensminger M. Dysmenorrhea and use of oral contraceptives in adolescent women attending a family planning clinic. *Am J Obstet Gynecol*. 1992 Feb;166(2):578-83

Formatted: Space After: 0 pt, Pattern: Clear (White)

16.

Formatted: Indent: Left: 0.5", No bullets or numbering

17-18. Lidegaard O, Nielsen LH, Skovlund CW, Løkkegaard E. Venous thrombosis in users of non-hormonal contraception: follow-up study, Denmark 2001-10. *BMJ* 2012;344:e2990.

18-19. Jick SS, Hernandez RK. [Risk of non-fatal venous thromboembolism in women using oral contraceptives containing drospirenone compared with women using oral contraceptives containing levonorgestrel: case-control study using United States claims data](#). *BMJ* 2011;342:d2151. doi: 10.1136/bmj.d2151

19-20. Parkin L, Sharples K, Hernandez RK, Jick SS. Risk of venous thromboembolism in users of oral contraceptives containing drospirenone or levonorgestrel: nested case-control study based on UK General Practice Research Database. *BMJ* 2011;342:d2139. doi: 10.1136/bmj.d2139.

Field Code Changed

Field Code Changed

Field Code Changed

Field Code Changed

20-21. Lidegaard Ø, Milsom I, Geirsson RT, Skjeldstad FE. Hormonal contraception and venous thromboembolism. *Acta Obstet Gynecol Scand* 2012;9:769-78.

Field Code Changed

Field Code Changed

Field Code Changed

21-22. Dinger IC, Heinemann LA, Kühl-Habich D. The safety of a drospirenone-containing oral contraceptive: final results from the European Active Surveillance Study on oral contraceptives based on 142,475 women-years of observation. *Contraception* 2007;75:344-54.

Field Code Changed

Field Code Changed

Field Code Changed

Field Code Changed

1  
2  
3  
4  
5  
6  
7  
8 | 22-23. Dinger J, [Assmann A](#), [Möhner S](#), [Minh TD](#). Risk of venous thromboembolism and the use of  
9 | dienogest- and drospirenone-containing oral contraceptives: results from a German case-control  
10 | study. *J Fam Plann Reprod Health Care* 2010;36:123-9.  
11 |

12 | 23-24. [Shapiro S](#), Dinger J. Risk of venous thromboembolism among users of oral contraceptives: a  
13 | review of two recently published studies. *J Fam Plann Reprod Health Care* 2010;36:33-8.  
14 |

15 | 24-25. Dinger J, [Shapiro S](#). Combined oral contraceptives, venous thromboembolism, and the  
16 | problem of interpreting large but incomplete datasets. *J Fam Plann Reprod Health Care*  
17 | 2012;38:2-6  
18 |  
19 |  
20 |  
21 |  
22 |  
23 |  
24 |  
25 |  
26 |  
27 |  
28 |  
29 |  
30 |  
31 |  
32 |  
33 |  
34 |  
35 |  
36 |  
37 |  
38 |  
39 |  
40 |  
41 |  
42 |  
43 |  
44 |  
45 |  
46 |  
47 |  
48 |  
49 |  
50 |  
51 |  
52 |  
53 |  
54 |  
55 |  
56 |  
57 |  
58 |  
59 |  
60 |

## CONTRIBUTORS

AJ and JB planned the study, supervised the analysis, interpreted the results, and wrote the manuscript. AJ is guarantor of the study.

ABW planned the study, prepared all data from the Swedish Prescribed Drug Register, made the statistical analyses and interpreted the results.

ML and AF interpreted the results, and revised the manuscript.

All authors discussed and approved the final manuscript.

AJ and JB decided when and where to attempt publication.

**Funding:** The expenses were covered by the County Council of Östergötland, Sweden.

**Competing interests:** All authors have completed the ICMJE uniform disclosure form at [www.icmje.org/coi\\_disclosure.pdf](http://www.icmje.org/coi_disclosure.pdf) (available on request from the corresponding author) and declare: no support from any organisation for the submitted work.

JB report financial relations to MSD Sweden and Bayer AB, Sweden (see attached declaration). The other investigators declared no financial relationships with any organisations that might have an interest in the submitted work in the previous three years, and no other relationships or activities that could appear to have influenced the submitted work.

**Ethical approval:** This study was approved by the Regional Ethical Review Board, Linköping, Sweden (Dnr M125-08).

**Data sharing:** No additional data available.

1  
2  
3  
4  
5  
6  
7  
8 **What is already known on this topic**

9  
10 Compliance and adherence to contraceptive use is almost always overestimated in clinical trials. Data on  
11 difference in compliance and adherence between different formulations of oral contraception is lacking or  
12 of poor quality. Knowledge of adherence and compliance is essential when it comes to avoid unintended  
13 pregnancies.  
14

15  
16 **What this study adds**

17  
18 Users of progestin-only pills more frequently choose another hormonal contraceptive method or  
19 discontinue use within six months. Users of drospirenone containing combined oral contraceptives were  
20 the least likely to switch method. The results indicate a more favourable profile concerning adherence to  
21 treatment for drospirenone containing combined oral contraceptives. This may be of clinical interest when  
22 it comes to a decision of what type of oral contraceptives the individual woman should be recommended.  
23  
24  
25  
26  
27  
28  
29  
30  
31  
32  
33  
34  
35  
36  
37  
38  
39  
40  
41  
42  
43  
44  
45  
46  
47  
48  
49  
50  
51  
52  
53  
54  
55  
56  
57  
58  
59  
60

STROBE Statement – checklist of items that should be included in reports of observational studies.

|     |                                                                                                                                                                                                                                                                                     |
|-----|-------------------------------------------------------------------------------------------------------------------------------------------------------------------------------------------------------------------------------------------------------------------------------------|
| 1a  | Done                                                                                                                                                                                                                                                                                |
| 1b  | Done                                                                                                                                                                                                                                                                                |
| 2   | Done                                                                                                                                                                                                                                                                                |
| 3   | <i>Intoduction</i> , last paragraph                                                                                                                                                                                                                                                 |
| 4   | <i>Method</i> , first sentence                                                                                                                                                                                                                                                      |
| 5   | <i>Method</i> , first and second paragraph                                                                                                                                                                                                                                          |
| 6a  | <i>Method</i> , first and second paragraph                                                                                                                                                                                                                                          |
| 6b  | We consider this as not relevant                                                                                                                                                                                                                                                    |
| 7   | In <i>Statistical analysis</i> , there are descriptions of the variables: “age groups”, “changing type” and “using same drug after 6 months”                                                                                                                                        |
| 8   | Not relevant – all information is from the Swedish Prescribed Drug Register                                                                                                                                                                                                         |
| 9   | In this study with an intention to solely describe the switching/ continuation rate and not to explain its underlying causes, the risk of presenting biased results is not an immediate problem. Especially not since we consider the external validity in this study as very high. |
| 10  | We consider this as not relevant                                                                                                                                                                                                                                                    |
| 11  | <i>Statistical analyses</i>                                                                                                                                                                                                                                                         |
| 12a | Relative risks together with 95% CIs are used for the analyses, and its composition in terms of risk outcome and reference category in the ratio as well as CI interval calculations are presented in <i>Statistical analysis</i> .                                                 |
| 12b | We consider this as not relevant                                                                                                                                                                                                                                                    |
| 12c | We have used register data with a most probable complete registration (see <i>Strengths and limitations of the study</i> )                                                                                                                                                          |
| 12d | Please see item 12c                                                                                                                                                                                                                                                                 |
| 12e | We have previously calculated the proportions for switching product within 12 months and found the pattern quite similar.                                                                                                                                                           |
| 13a | See table 1 and table 2                                                                                                                                                                                                                                                             |
| 13b | We consider this as not relevant                                                                                                                                                                                                                                                    |
| 13c | We believe that the description of inclusion is rather uncomplicated and that the description in <i>Method</i> , first and paragraph is easy to follow.                                                                                                                             |
| 14a | We have not included data on such information in this study                                                                                                                                                                                                                         |
| 14b | There are no missing data in our chosen variables                                                                                                                                                                                                                                   |
| 14c | The follow-up time is exactly six months for each woman in the study.                                                                                                                                                                                                               |
| 15  | Please see table 1 and table 2                                                                                                                                                                                                                                                      |
| 16a | Please see table 1                                                                                                                                                                                                                                                                  |
| 16b | Please see <i>Statistical analyses</i>                                                                                                                                                                                                                                              |
| 16c | Please see table 1                                                                                                                                                                                                                                                                  |
| 17  | We consider this as not relevant                                                                                                                                                                                                                                                    |
| 18  | <i>Discussion</i> , first paragraph                                                                                                                                                                                                                                                 |
| 19  | Please see <i>Strengths and limitations of the study</i>                                                                                                                                                                                                                            |
| 20  | <i>Conclusion</i>                                                                                                                                                                                                                                                                   |
| 21  | Very high external validity (see <i>Strengths and limitations of the study</i> )                                                                                                                                                                                                    |
| 22  | No funding                                                                                                                                                                                                                                                                          |



1  
2  
3 16th January 2013  
4

5 Dear Dr. Josefsson  
6

7 # BMJ.2013.010282 entitled "Patterns of adherence to oral hormonal contraceptives in a cohort of first  
8 time users: a population based registry study, Sweden 2005-2010"  
9

10  
11 Thank you for sending us your paper. We read it with interest but I regret to say that we have decided  
12 not to publish it in the BMJ.  
13

14 We enjoyed reading the study and were impressed by the comprehensive nature of your dataset.  
15 However we also noted the limitations and particularly that the nature of the study makes it difficult to  
16 know why people started particular preparations and also why people switched (or discontinued). The  
17 study may be appropriate for a specialist journal and hopefully lead to further research into the  
18 adverse effects of the different preparations.  
19

20  
21 We receive over 8000 submissions a year and accept less than 10%. We do therefore have to make  
22 hard decisions on just how interesting an article will be to our general clinical readers, how much it  
23 adds, and how much practical value it will be.  
24

25  
26 If your paper is describing a research project you may want to consider sending this paper to BMJ  
27 Open, our new sister journal, which is now taking submissions at  
28 <http://mc.manuscriptcentral.com/bmjopen>. BMJ Open ( <http://bmjopen.bmj.com> ) is an open access,  
29 open peer-reviewed, online journal from the BMJ Group dedicated to publishing high quality,  
30 methodologically sound medical research from all disciplines and therapeutic areas. All types of  
31 research article are welcome, from pilot studies to meta-analyses.  
32

33 If you would like your article to be considered by BMJ Open submit at the address above, or contact  
34 the editorial office [editorial.bmjopen@bmjgroup.com](mailto:editorial.bmjopen@bmjgroup.com) with your manuscript number for more  
35 information. Papers accepted for publication will be subject to an article processing charge.  
36

37  
38 Thank you for considering BMJ for the publication of your research. I hope the outcome of this  
39 specific submission will not discourage you from the submission of future manuscripts.  
40

41 Yours sincerely  
42

43  
44 Krishna Chinthapalli  
45 [kchinthapalli@bmj.com](mailto:kchinthapalli@bmj.com)  
46  
47  
48  
49  
50  
51  
52  
53  
54  
55  
56  
57  
58  
59  
60



## ICMJE Form for Disclosure of Potential Conflicts of Interest

### Section 1. Identifying Information

1. Given Name (First Name)

Ann

2. Surname (Last Name)

Josefsson

3. Date

13-June-2013

4. Are you the corresponding author?

Yes  No

5. Manuscript Title

Patterns of adherence to oral hormonal contraceptives in a cohort of first time users: a population based registry study, Sweden 2005-2010

6. Manuscript Identifying Number (if you know it)

### Section 2. The Work Under Consideration for Publication

Did you or your institution **at any time** receive payment or services from a third party (government, commercial, private foundation, etc.) for any aspect of the submitted work (including but not limited to grants, data monitoring board, study design, manuscript preparation, statistical analysis, etc.)?

Are there any relevant conflicts of interest?  Yes  No

### Section 3. Relevant financial activities outside the submitted work.

Place a check in the appropriate boxes in the table to indicate whether you have financial relationships (regardless of amount of compensation) with entities as described in the instructions. Use one line for each entity; add as many lines as you need by clicking the "Add +" box. You should report relationships that were **present during the 36 months prior to publication**.

Are there any relevant conflicts of interest?  Yes  No

### Section 4. Intellectual Property -- Patents & Copyrights

Do you have any patents, whether planned, pending or issued, broadly relevant to the work?  Yes  No



## ICMJE Form for Disclosure of Potential Conflicts of Interest

### Section 5. Relationships not covered above

Are there other relationships or activities that readers could perceive to have influenced, or that give the appearance of potentially influencing, what you wrote in the submitted work?

- Yes, the following relationships/conditions/circumstances are present (explain below):
- No other relationships/conditions/circumstances that present a potential conflict of interest

At the time of manuscript acceptance, journals will ask authors to confirm and, if necessary, update their disclosure statements. On occasion, journals may ask authors to disclose further information about reported relationships.

### Section 6. Disclosure Statement

Based on the above disclosures, this form will automatically generate a disclosure statement, which will appear in the box below.

### Evaluation and Feedback

Please visit <http://www.icmje.org/cgi-bin/feedback> to provide feedback on your experience with completing this form.

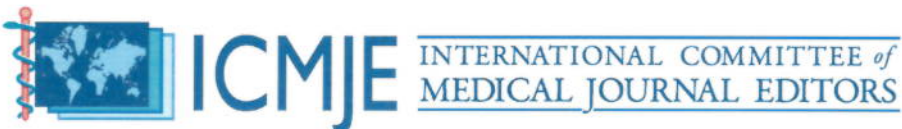

## ICMJE Form for Disclosure of Potential Conflicts of Interest

### Section 1. Identifying Information

|                                                   |                                                                                                                                            |                             |
|---------------------------------------------------|--------------------------------------------------------------------------------------------------------------------------------------------|-----------------------------|
| 1. Given Name (First Name)                        | 2. Surname (Last Name)                                                                                                                     | 3. Date                     |
| Ann-Britt                                         | Wirehn                                                                                                                                     | 13-June-2013                |
| 4. Are you the corresponding author?              | <input type="checkbox"/> Yes <input checked="" type="checkbox"/> No                                                                        | Corresponding Author's Name |
|                                                   |                                                                                                                                            | Ann Josefsson               |
| 5. Manuscript Title                               | Patterns of adherence to oral hormonal contraceptives in a cohort of first time users: a population based registry study, Sweden 2005-2010 |                             |
| 6. Manuscript Identifying Number (if you know it) |                                                                                                                                            |                             |

### Section 2. The Work Under Consideration for Publication

Did you or your institution **at any time** receive payment or services from a third party (government, commercial, private foundation, etc.) for any aspect of the submitted work (including but not limited to grants, data monitoring board, study design, manuscript preparation, statistical analysis, etc.)?

Are there any relevant conflicts of interest?  Yes  No

### Section 3. Relevant financial activities outside the submitted work.

Place a check in the appropriate boxes in the table to indicate whether you have financial relationships (regardless of amount of compensation) with entities as described in the instructions. Use one line for each entity; add as many lines as you need by clicking the "Add +" box. You should report relationships that were **present during the 36 months prior to publication**.

Are there any relevant conflicts of interest?  Yes  No

### Section 4. Intellectual Property -- Patents & Copyrights

Do you have any patents, whether planned, pending or issued, broadly relevant to the work?  Yes  No

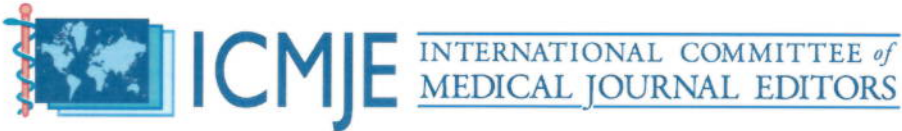

## ICMJE Form for Disclosure of Potential Conflicts of Interest

### Section 5. Relationships not covered above

Are there other relationships or activities that readers could perceive to have influenced, or that give the appearance of potentially influencing, what you wrote in the submitted work?

- Yes, the following relationships/conditions/circumstances are present (explain below):
- No other relationships/conditions/circumstances that present a potential conflict of interest

At the time of manuscript acceptance, journals will ask authors to confirm and, if necessary, update their disclosure statements. On occasion, journals may ask authors to disclose further information about reported relationships.

### Section 6. Disclosure Statement

Based on the above disclosures, this form will automatically generate a disclosure statement, which will appear in the box below.

### Evaluation and Feedback

Please visit <http://www.icmje.org/cgi-bin/feedback> to provide feedback on your experience with completing this form.



## ICMJE Form for Disclosure of Potential Conflicts of Interest

### Section 1. Identifying Information

|                                                                                                                                                                   |                                                                     |                                              |
|-------------------------------------------------------------------------------------------------------------------------------------------------------------------|---------------------------------------------------------------------|----------------------------------------------|
| 1. Given Name (First Name)<br>Malou                                                                                                                               | 2. Surname (Last Name)<br>Lindberg                                  | 3. Date<br>13-June-2013                      |
| 4. Are you the corresponding author?                                                                                                                              | <input type="checkbox"/> Yes <input checked="" type="checkbox"/> No | Corresponding Author's Name<br>Ann Josefsson |
| 5. Manuscript Title<br>Patterns of adherence to oral hormonal contraceptives in a cohort of first time users: a population based registry study, Sweden 2005-2010 |                                                                     |                                              |
| 6. Manuscript Identifying Number (if you know it)                                                                                                                 |                                                                     |                                              |

### Section 2. The Work Under Consideration for Publication

Did you or your institution **at any time** receive payment or services from a third party (government, commercial, private foundation, etc.) for any aspect of the submitted work (including but not limited to grants, data monitoring board, study design, manuscript preparation, statistical analysis, etc.)?

Are there any relevant conflicts of interest?  Yes  No

### Section 3. Relevant financial activities outside the submitted work.

Place a check in the appropriate boxes in the table to indicate whether you have financial relationships (regardless of amount of compensation) with entities as described in the instructions. Use one line for each entity; add as many lines as you need by clicking the "Add +" box. You should report relationships that were **present during the 36 months prior to publication**.

Are there any relevant conflicts of interest?  Yes  No

### Section 4. Intellectual Property -- Patents & Copyrights

Do you have any patents, whether planned, pending or issued, broadly relevant to the work?  Yes  No

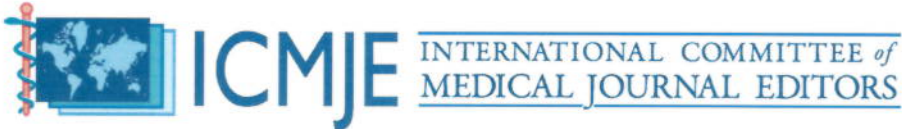

## ICMJE Form for Disclosure of Potential Conflicts of Interest

### Section 5. Relationships not covered above

Are there other relationships or activities that readers could perceive to have influenced, or that give the appearance of potentially influencing, what you wrote in the submitted work?

- Yes, the following relationships/conditions/circumstances are present (explain below):
- No other relationships/conditions/circumstances that present a potential conflict of interest

At the time of manuscript acceptance, journals will ask authors to confirm and, if necessary, update their disclosure statements. On occasion, journals may ask authors to disclose further information about reported relationships.

### Section 6. Disclosure Statement

Based on the above disclosures, this form will automatically generate a disclosure statement, which will appear in the box below.

### Evaluation and Feedback

Please visit <http://www.icmje.org/cgi-bin/feedback> to provide feedback on your experience with completing this form.

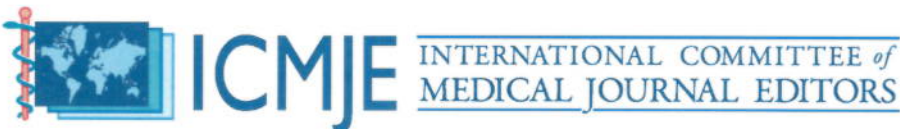

## ICMJE Form for Disclosure of Potential Conflicts of Interest

### Section 5. Relationships not covered above

Are there other relationships or activities that readers could perceive to have influenced, or that give the appearance of potentially influencing, what you wrote in the submitted work?

- Yes, the following relationships/conditions/circumstances are present (explain below):
- No other relationships/conditions/circumstances that present a potential conflict of interest

At the time of manuscript acceptance, journals will ask authors to confirm and, if necessary, update their disclosure statements. On occasion, journals may ask authors to disclose further information about reported relationships.

### Section 6. Disclosure Statement

Based on the above disclosures, this form will automatically generate a disclosure statement, which will appear in the box below.

### Evaluation and Feedback

Please visit <http://www.icmje.org/cgi-bin/feedback> to provide feedback on your experience with completing this form.



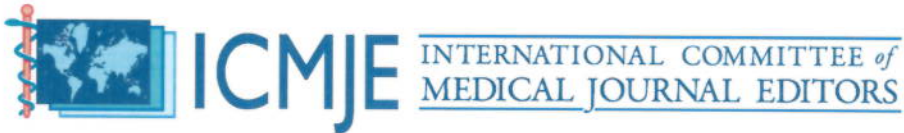

## ICMJE Form for Disclosure of Potential Conflicts of Interest

### Section 1. Identifying Information

|                                                                                                                                                                   |                                                                     |                                              |
|-------------------------------------------------------------------------------------------------------------------------------------------------------------------|---------------------------------------------------------------------|----------------------------------------------|
| 1. Given Name (First Name)<br>Annika                                                                                                                              | 2. Surname (Last Name)<br>Foldemo                                   | 3. Date<br>13-June-2013                      |
| 4. Are you the corresponding author?                                                                                                                              | <input type="checkbox"/> Yes <input checked="" type="checkbox"/> No | Corresponding Author's Name<br>Ann Josefsson |
| 5. Manuscript Title<br>Patterns of adherence to oral hormonal contraceptives in a cohort of first time users: a population based registry study, Sweden 2005-2010 |                                                                     |                                              |
| 6. Manuscript Identifying Number (if you know it)                                                                                                                 |                                                                     |                                              |

### Section 2. The Work Under Consideration for Publication

Did you or your institution **at any time** receive payment or services from a third party (government, commercial, private foundation, etc.) for any aspect of the submitted work (including but not limited to grants, data monitoring board, study design, manuscript preparation, statistical analysis, etc.)?

Are there any relevant conflicts of interest?  Yes  No

### Section 3. Relevant financial activities outside the submitted work.

Place a check in the appropriate boxes in the table to indicate whether you have financial relationships (regardless of amount of compensation) with entities as described in the instructions. Use one line for each entity; add as many lines as you need by clicking the "Add +" box. You should report relationships that were **present during the 36 months prior to publication**.

Are there any relevant conflicts of interest?  Yes  No

### Section 4. Intellectual Property -- Patents & Copyrights

Do you have any patents, whether planned, pending or issued, broadly relevant to the work?  Yes  No



## ICMJE Form for Disclosure of Potential Conflicts of Interest

### Section 1. Identifying Information

1. Given Name (First Name)  
Jan

2. Surname (Last Name)  
Brynhildsen

3. Date  
13-June-2013

4. Are you the corresponding author?  Yes  No Corresponding Author's Name

5. Manuscript Title  
Patterns of adherence to oral hormonal contraceptives in a cohort of first time users: a population based registry study, Sweden 2005-2010

6. Manuscript Identifying Number (if you know it)

### Section 2. The Work Under Consideration for Publication

Did you or your institution at **any time** receive payment or services from a third party (government, commercial, private foundation, etc.) for any aspect of the submitted work (including but not limited to grants, data monitoring board, study design, manuscript preparation, statistical analysis, etc.)?

Are there any relevant conflicts of interest?  Yes  No

### Section 3. Relevant financial activities outside the submitted work.

Place a check in the appropriate boxes in the table to indicate whether you have financial relationships (regardless of amount of compensation) with entities as described in the instructions. Use one line for each entity; add as many lines as you need by clicking the "Add +" box. You should report relationships that were **present during the 36 months prior to publication**.

Are there any relevant conflicts of interest?  Yes  No

If yes, please fill out the appropriate information below.

| Name of Entity | Grant?                   | Personal Fees?                      | Non-Financial Support?   | Other?                   | Comments |
|----------------|--------------------------|-------------------------------------|--------------------------|--------------------------|----------|
|                | <input type="checkbox"/> | <input checked="" type="checkbox"/> | <input type="checkbox"/> | <input type="checkbox"/> | Se below |

### Section 4. Intellectual Property -- Patents & Copyrights

Do you have any patents, whether planned, pending or issued, broadly relevant to the work?  Yes  No

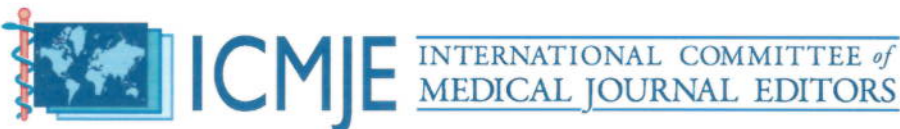

## ICMJE Form for Disclosure of Potential Conflicts of Interest

### Section 5. Relationships not covered above

Are there other relationships or activities that readers could perceive to have influenced, or that give the appearance of potentially influencing, what you wrote in the submitted work?

- Yes, the following relationships/conditions/circumstances are present (explain below):
- No other relationships/conditions/circumstances that present a potential conflict of interest

#### Competing interests:

Jan Brynhildsen (JB) has been reimbursed by Merck Sharpe & Dohme (MSD), Sweden, the manufacturer of desogestrel-containing contraceptives in Sweden, for running educational programmes and giving lectures. JB has also been paid by Bayer AB, Sweden, the manufacturer of some of the levonorgestrel-containing contraceptives and all drospirenone-containing combined oral contraceptives available in Sweden, for giving lectures. JB has also been the member of the Swedish medical advisory board of MSD between 2008 and 2012.

At the time of manuscript acceptance, journals will ask authors to confirm and, if necessary, update their disclosure statements. On occasion, journals may ask authors to disclose further information about reported relationships.

### Section 6. Disclosure Statement

Based on the above disclosures, this form will automatically generate a disclosure statement, which will appear in the box below.

#### Competing interests:

Jan Brynhildsen (JB) has been reimbursed by Merck Sharpe & Dohme (MSD), Sweden, the manufacturer of desogestrel-containing contraceptives in Sweden, for running educational programmes and giving lectures. JB has also been paid by Bayer AB, Sweden, the manufacturer of some of the levonorgestrel-containing contraceptives and all drospirenone-containing combined oral contraceptives available in Sweden, for giving lectures. JB has also been the member of the Swedish medical advisory board of MSD between 2008 and 2012.

### Evaluation and Feedback

Please visit <http://www.icmje.org/cgi-bin/feedback> to provide feedback on your experience with completing this form.



**Continuation rates of oral hormonal contraceptives in a cohort of first time users: a population based registry study, Sweden 2005-2010**

|                                 |                                                                                                                                                                                                                                                                                                                                                                                                                                                                                                                             |
|---------------------------------|-----------------------------------------------------------------------------------------------------------------------------------------------------------------------------------------------------------------------------------------------------------------------------------------------------------------------------------------------------------------------------------------------------------------------------------------------------------------------------------------------------------------------------|
| Journal:                        | <i>BMJ Open</i>                                                                                                                                                                                                                                                                                                                                                                                                                                                                                                             |
| Manuscript ID:                  | bmjopen-2013-003401.R2                                                                                                                                                                                                                                                                                                                                                                                                                                                                                                      |
| Article Type:                   | Research                                                                                                                                                                                                                                                                                                                                                                                                                                                                                                                    |
| Date Submitted by the Author:   | 03-Sep-2013                                                                                                                                                                                                                                                                                                                                                                                                                                                                                                                 |
| Complete List of Authors:       | Josefsson, Dr Ann; Faculty of Health Sciences , Division of obstetrics&gynaecology, Dep. Clinical and Experimental Medicine<br>Wiréhn, Ann-Britt; Faculty of Health Sciences, Div Obstetrics& Gynaecology, Dep. Clinical and Experimental Sciences<br>Lindberg, Malou; Faculty of Health Sciences, Department of Medical and Health Sciences, Primary Care<br>Foldemo, Annika; Department of Medical and Health Sciences,<br>Brynhildsen, Jan; Obstetrics and Gynaecology, Department of Clinical and Experimental medicine |
| <b>Primary Subject Heading</b>: | Obstetrics and gynaecology                                                                                                                                                                                                                                                                                                                                                                                                                                                                                                  |
| Secondary Subject Heading:      | Reproductive medicine, Obstetrics and gynaecology                                                                                                                                                                                                                                                                                                                                                                                                                                                                           |
| Keywords:                       | Reproductive medicine < GYNAECOLOGY, PUBLIC HEALTH, Community gynaecology < GYNAECOLOGY                                                                                                                                                                                                                                                                                                                                                                                                                                     |
|                                 |                                                                                                                                                                                                                                                                                                                                                                                                                                                                                                                             |

SCHOLARONE™  
Manuscripts

only

1  
2  
3 **Continuation rates of oral hormonal contraceptives in a cohort of first time**  
4 **users: a population based registry study, Sweden 2005-2010**  
5  
6

7 Ann Josefsson *Associate Professor, senior consultant*<sup>1</sup>, Ann-Britt Wiréhn *PhD, statistician*<sup>1,2</sup>

8  
9 Malou Lindberg *Associate Professor*<sup>2,3</sup>, Anniqa Foldemo *PhD*<sup>2,4</sup>, Jan Brynhildsen *Associate*  
10 *Professor, senior consultant*<sup>1</sup>  
11

12 <sup>1</sup>Division of Obstetrics and Gynaecology, Department of Clinical and Experimental  
13 Medicine, Faculty of Health Sciences, Linköping University, Department of Obstetrics and  
14 Gynaecology in Linköping, County Council of Östergötland, Linköping, Sweden  
15

16 <sup>2</sup>Local Health Care Research and Development Unit, County Council in Östergötland,  
17 Linköping, Sweden  
18

19 <sup>3</sup>Department of Medical and Health Sciences, Primary Care, Linköping University,  
20 Linköping, Sweden  
21

22 <sup>4</sup>Department of Medical and Health Sciences, Faculty of Health Sciences, Linköping  
23 University, Linköping, Sweden  
24  
25

26  
27  
28  
29  
30  
31  
32 Correspondence to:

33 Jan Brynhildsen  
34 Division of Obstetrics and Gynaecology,  
35 Linköping University, Faculty of Health Sciences,  
36 University Hospital,  
37 SE-58185, Linköping, Sweden  
38

39  
40  
41 [jan.brynhildsen@lio.se](mailto:jan.brynhildsen@lio.se)

42  
43 [Tel: +46 10 1030000](tel:+46101030000)

44  
45  
46 Fax: +46 13 14 81 56  
47

48  
49  
50 The Corresponding Author has the right to grant on behalf of all authors and does grant on  
51 behalf of all authors, an exclusive licence on a worldwide basis to the BMJ Publishing Group  
52 Ltd to permit this article (if accepted) to be published in BMJ editions and any other  
53 BMJ PGL products and sublicences such use and exploit all subsidiary rights, as set out in our  
54  
55  
56  
57  
58  
59  
60

1  
2  
3 licence.  
4  
5

6 **Key words:** Hormonal contraceptives; Oral contraceptives; Patient adherence; Registries ;  
7 Follow-up studies  
8  
9

10  
11 **Word count:**  
12  
13  
14  
15  
16  
17  
18  
19  
20  
21  
22  
23  
24  
25  
26  
27  
28  
29  
30  
31  
32  
33  
34  
35  
36  
37  
38  
39  
40  
41  
42  
43  
44  
45  
46  
47  
48  
49  
50  
51  
52  
53  
54  
55  
56  
57  
58  
59  
60

For peer review only

**ABSTRACT**

**Objective** To investigate if continuation rates in first-time users of oral hormonal contraceptives differed between different formulations and to measure if rates were related to prescribing categories, i.e. physicians and midwives.

**Design** A longitudinal national population-based registry study

**Setting** The Swedish prescribed drug register

**Participants** All females born 1977-1994 defined as first-time users of hormonal contraceptives from 2007 to 2009 (n = 226 211).

**Main outcome measures** Tendency to switch type of hormonal contraceptive within 6 months use and repeated dispensation identical to first were estimated as percentages and relative risks. Physicians' and midwives' prescription patterns concerning the women's continuation rates of oral hormonal contraceptive type.

**Results** In Sweden there were 782 375 women born 1977-1994 at the time of the study. Of these, 226 211 women were identified as first-time users of hormonal contraceptives. Ethinylestradiol + levonorgestrel, desogestrel-only and ethinylestradiol + drospirenone were the hormonal contraceptives most commonly dispensed for first-time users, 43.3 %, 24.4 % and 11.1 %, respectively. The overall rate of switching contraceptive type in the first six months was 11.3%, highest for desogestrel-only (14.3%) and lowest for ethinylestradiol + drospirenone (6.6 %). The switching rate for all three products was highest in 16-19 year age group. Having a repeated dispensation identical to the initial was highest for users of ethinylestradiol either combined with levonorgestrel or drospirenone, 81.4% and 81.2% respectively, whereas this rate for the initial desogestrel-only users was 71.5%. The RR of switching of contraceptive type within the first six months was 1.35 (95% CI: 1.32-1.39) for desogestrel-only and 0.63 (0.59-0.66) for ethinylestradiol + drospirenone compared to ethinylestradiol + levonorgestrel as reference category. The physicians' and midwives' prescription patterns concerning the women's continuation rates differed only slightly.

**Conclusion** Desogestrel-only users conferred the highest switcher rate to another hormonal contraceptive within a 6-months period. Users of ethinylestradiol + levonorgestrel were more prone to switch to another product within six months than women using ethinylestradiol + drospirenone. These findings may be of clinical importance when tailoring hormonal contraceptives on an individual basis.

## ARTICLE SUMMARY

### Article focus

- Continuation of contraceptive use is of utmost importance to avoid unintended pregnancies
- In Sweden, a change in prescription pattern has been observed, from combined oral contraceptives to progestin-only-pills, most probably due to media alarm
- Do continuation rates differ between different formulations of combined oral contraceptives?

### Key messages

- Users of progestin-only pills more frequently choose another hormonal contraceptive method, or discontinue use within six months, than users of combined oral contraceptives
- Users of drospirenone containing combined oral contraceptives were the least likely to switch method

### Strengths and limitations of this study

- The Swedish Prescribed Drug Register covers all drugs dispensed from all Swedish pharmacies since July 2005. Since sale information is transferred directly from the cashier to the register, data is complete and results in a high external validity for the register
- The large amount of data gives a high precision to the point estimates.
- We have not been able to control for discontinuation due to a wish to become pregnant.



## INTRODUCTION

Adherence to treatment and continuation of contraceptive use is crucial in the efforts to avoid unwanted pregnancies. Oral contraceptive (OC) use is however; generally characterized by relatively high discontinuation rates and low adherence to treatment(1). Reasons for discontinuation and poor adherence have been reported to be side effects but also the fear of side effects. Reported side effects include mood disturbances, decrease in libido, weight gain and poor bleeding control and the fear also includes the risk of venous thromboembolism (2, 3). Most of these reported side effects can be attributed to the progestogen component of the pill. Consequently, new progestogens with a potential of a more beneficial profile concerning side effects have been developed. Despite these improvements, discontinuation rates are still high.

A huge mass of studies has been performed, but there is only sparse evidence of differences in continuation rates between different types of hormonal contraceptives. Type of progestogen (4, 5), number of oral contraceptive pill packages dispensed (6), prescription drug or over the counter (7) have all been proposed as determinants for continuation. Moreover, improvements of the formulations of combined hormonal contraceptives (COC) have been made in order to increase continuation rates. Such improvements include new routes of administration and different regimens, i.e. mono-, bi-, tri-, and four -phasic pills, patches and vaginal rings (8, 9). So far, there is only limited evidence that use of a specific formulation or route of administration, would be a better choice concerning continuation rates (4-9).

In several Cochrane reviews concerning adherence and continuation rates, the authors have concluded that most studies are hampered either by design or by involvement of pharmaceutical companies and the results must therefore be interpreted with caution (4,5,10). Actually, there is still a great need for studies emphasizing continuation/discontinuation and the following risk of unintended pregnancies.

In Sweden, most contraceptives are prescribed by midwives. COC, progestin-only pills, implants, progestin-injectable (Depo-Provera<sup>®</sup>), hormonal-intruterine-system (Mirena<sup>®</sup>) but no combined hormonal injectable are available.

The prescription pattern in Sweden somewhat differs from most other countries as desogestrel-only pills have a very high market share and is the most commonly prescribed hormonal contraceptive. This is most probably an effect of media alarm and very cautious recommendations by the Swedish Medical Products Agency. Poor bleeding control is,

1  
2  
3 however, more common during POP-use and has been reported to be a common cause of  
4 discontinuation (2).  
5  
6  
7

8  
9 We hypothesised that switching product within six months is more common among  
10 desogestrel-only users compared to users of etinylestradiol + levonorgestrel and that users of  
11 ethinylestradiol + drospirenonone are least prone to switch product within six months. The  
12 aim of the present study was to investigate if continuation rates in terms of repeated dispensed  
13 packages of the initially prescribed hormonal contraceptives differed between different  
14 formulations in a whole population. Secondly to measure if rates were related to prescribing  
15 categories, i.e. physicians and midwives.  
16  
17  
18  
19  
20  
21  
22  
23  
24  
25  
26  
27  
28  
29  
30  
31  
32  
33  
34  
35  
36  
37  
38  
39  
40  
41  
42  
43  
44  
45  
46  
47  
48  
49  
50  
51  
52  
53  
54  
55  
56  
57  
58  
59  
60

## METHODS

In this study, women identified as first-time users of hormonal contraceptives were treated as a cohort and followed for six months. Information on all women's prescribed and dispensed hormonal contraceptives from July 2005 to December 2010 was collected from the Swedish Prescribed Drug Register (11). The inclusion criteria for data extraction were: female born 1977-1994 with at least one dispensation of hormonal contraceptives at least once during the 5.5 year-period. The study population consisted of women without any dispensed hormonal contraceptive therapy in the 18 months between July 2005 - December 2006 but who had received at least one dispensation between January 2007-December 2009. This group was thus considered to be first-time users and constituted the study cohort in this study. Data from 2010 was used to identify those who had switched to a drug other than the first-dispensed drug after 2009 as well as those who had a second dispensation for the drug originally prescribed. Thus, 5.5 years data was used in this study.

The Swedish Prescribed Drug Register covers all drugs prescribed and dispensed for the entire Swedish population from June 2005 to the present. From this database we have obtained data on drugs having the Anatomical therapeutic chemical codes G03AA or G033AB (combined hormonal contraceptives) and G03AC (progestin only), from July 2005 to December 2010. We organized data by type for the three most common drugs, here referred to by their generic names: 1) ethinylestradiol + levonorgestrel, 2) ethinylestradiol + drospirenone and 3) desogestrel-only. The remaining hormonal contraceptives were placed in two other groups. The first, "Other oral contraceptives", included ethinylestradiol combined with either lynestrenol, norgestimat or desogestrel, and the progestin-only drugs norethisterone and lynestrenol). The second, "Other galenic forms", included intrauterine systems, transdermal patches, implants and injections. Although the correct designation for data from the Swedish Prescribed Drug Register is, "prescribed and dispensed" drugs, from now on the term used in this paper will be "dispensed" drugs.

### Statistical analysis

The number of women who received an initial hormonal contraceptive drug during the three-year period January 2007 - December 2009 is presented by drug type and age. The population was divided into four age groups: 16-19, 20-24, 25-28 and 16-28 years. The usage patterns are presented as numbers, percentages of total dispensations per product type and age group. Relative risks (RR) of either changing drug use or being prescribed the same drug were calculated together with 95% confidence intervals for each group of oral contraceptives, with

1  
2  
3 ethinylestradiol + levonorgestrel as the reference category. The CI tails were obtained using  
4 the normal distribution approximation and delta method to derive standard errors (12). Those  
5 who initially used long-acting contraceptive methods (intrauterine systems, implants and  
6 injections) were not included in the risk analysis since the results would not be relevant given  
7 the length of the period of data inclusion in this study.  
8  
9

10  
11 As the majority of hormonal contraceptives in Sweden are prescribed by midwives, the usage  
12 pattern is also described in relation to prescribers, physician or midwife. Measures carried out  
13 divided on prescriber categories were the prescription distribution in percent within each  
14 prescriber category, and within each product type. The percentages of first-time users who  
15 switched to a new drug within 6 months of receiving the first and of those who continued to  
16 use the first drug are presented in relation to prescriber category.  
17  
18  
19  
20  
21  
22  
23  
24  
25  
26  
27  
28  
29  
30  
31  
32  
33  
34  
35  
36  
37  
38  
39  
40  
41  
42  
43  
44  
45  
46  
47  
48  
49  
50  
51  
52  
53  
54  
55  
56  
57  
58  
59  
60

## RESULTS

The Swedish census data 2010 showed that there were 782 375 women born between 1977 and 1994. The number of women who had used hormonal contraceptives at least once between July 2005 and December 2010 was 578 009 (~74%). After excluding those women who had a dispensation of OC during the first 18 months of the period, 226 211 were considered to be first-time users and were thus included in the statistical analyses.

The dispensation pattern for first-time users was: ethinylestradiol + levonorgestrel (43.3%), desogestrel-only (24.4%), and ethinylestradiol + drospirenone (11.1%) (Table 1). The percentage of first-time users who switched to a different drug before six months had elapsed was 11.3%. The rate was highest for desogestrel-only (14.3%) and lowest for ethinylestradiol + drospirenone (6.6 %). The group for whom a different drug was most often dispensed consisted of those 16-19 years of age and this was true for all three drugs. The 25-28 years of age group showed the lowest rate of change. The continuation rate, i.e. having a repeated dispensation identical to the initial, was highest for ethinylestradiol + levonorgestrel (81.4%) and ethinylestradiol + drospirenone (81.2%). The continuation rate for desogestrel-only was lower (71.5%). The rate of change decreased with age. The RR of switching to a different contraceptive within the first six months was 1.35 (95% CI: 1.32-1.39) for desogestrel-only and 0.63 (0.59-0.66) for ethinylestradiol + drospirenone where ethinylestradiol + levonorgestrel was used as the reference category. Hence, women using ethinylestradiol + drospirenone had the lowest RR for changing to a different type of hormonal contraceptive while those using desogestrel-only had the highest. Further, comparisons between the three formulations show that desogestrel-only users not only had the highest RR for changing to a different type of hormonal contraceptive but also the lowest RR for having a second dispensation identical to the first. The RR did neither vary by age group for changing the type of hormonal contraceptive during the first 6 months nor for having a repeated dispensation identical to first.

The physicians and midwives displayed essentially the same pattern of prescribing the second prescription for first-time users and no significant differences between categories were found. (Table 2). It is, however, worth noting that midwives prescribed the drug ethinylestradiol + drospirenone less often than physicians did. This drug was ranked as the fifth alternative choice for midwives and as the second alternative choice for physicians (in our five chosen groupings of hormonal contraceptives) (Table 2).

Table 1. Continuation rates in first time users of hormonal contraceptives in Sweden 2007-2009.

| Product type                       | Initial prescription and dispensation |        |            | Switching type before 6 months use |                    |               | Second prescription and dispensation identical to first |                     |                    |               |             |
|------------------------------------|---------------------------------------|--------|------------|------------------------------------|--------------------|---------------|---------------------------------------------------------|---------------------|--------------------|---------------|-------------|
|                                    | Age                                   | n      | % of total | n                                  | % per product type | Relative risk | (95% CI)                                                | n                   | % per product type | Relative risk | (95% CI)    |
| Ethinylestradiol + Levonorgestrel  | 16-19                                 | 73197  |            | 8234                               | 11.2               | 1 (reference) | (reference)                                             | 60945               | 83.3               | 1 (reference) | (reference) |
|                                    | 20-24                                 | 17140  |            | 1613                               | 9.4                |               |                                                         | 13158               | 76.8               |               |             |
|                                    | 25-28                                 | 7724   |            | 529                                | 6.8                |               |                                                         | 5692                | 73.7               |               |             |
|                                    | 16-28                                 | 98061  | 43.3       | 10376                              | 10.6               |               |                                                         | 79795               | 81.4               |               |             |
| Ethinylestradiol + Drospirenone    | 16-19                                 | 11604  |            | 952                                | 8.2                | 0.73          | (0.68-0.78)                                             | 9845                | 84.8               | 1.02          | (1.01-1.03) |
|                                    | 20-24                                 | 7889   |            | 433                                | 5.5                | 0.58          | (0.53-0.65)                                             | 6261                | 79.4               | 1.03          | (1.02-1.05) |
|                                    | 25-28                                 | 5655   |            | 279                                | 4.9                | 0.72          | (0.63-0.83)                                             | 4317                | 76.3               | 1.04          | (1.02-1.06) |
|                                    | 16-28                                 | 25148  | 11.1       | 1664                               | 6.6                | 0.63          | (0.59-0.66)                                             | 20423               | 81.2               | 1.00          | (0.99-1.00) |
| Desogestrel only                   | 16-19                                 | 29127  |            | 4977                               | 17.1               | 1.52          | (1.47-1.57)                                             | 21797               | 74.8               | 0.90          | (0.89-0.91) |
|                                    | 20-24                                 | 14172  |            | 1719                               | 12.1               | 1.29          | (1.21-1.37)                                             | 9657                | 68.1               | 0.89          | (0.88-0.90) |
|                                    | 25-28                                 | 11880  |            | 1206                               | 10.2               | 1.48          | (1.34-1.64)                                             | 7989                | 67.2               | 0.91          | (0.90-0.93) |
|                                    | 16-28                                 | 55179  | 24.4       | 7902                               | 14.3               | 1.35          | (1.32-1.39)                                             | 39443               | 71.5               | 0.88          | (0.87-0.88) |
| Other oral hormonal contraceptives | 16-28                                 | 23948  | 10.6       | 3016                               | 12.6               | 1.19          | (1.15-1.24)                                             | 18179               | 75.9               | 0.93          | (0.93-0.94) |
| Other galenic forms <sup>a</sup>   | 16-28                                 | 23875  | 10.6       |                                    |                    |               |                                                         |                     |                    |               |             |
| Total                              | 16-28                                 | 226211 | 100.0      | 22958 <sup>c</sup>                 | 11.3 <sup>c</sup>  |               |                                                         | 157840 <sup>c</sup> | 78.0 <sup>c</sup>  |               |             |

<sup>a</sup> intrauterine systems, transdermal patches, implants and injections

<sup>b</sup> irrelevant here as the treatment has long term effect

<sup>c</sup> excluding Other galenic forms

Table 2. Prescription and dispensation in first time users of hormonal contraceptives in Sweden 2007-2009 per product type and prescriber category together with continuation rates.

| Product type                       | Prescriber category | n      | Distribution within prescriber category % | Distribution within product type % | Switching type before 6 months use % | Second prescription and dispensation identical to first % |
|------------------------------------|---------------------|--------|-------------------------------------------|------------------------------------|--------------------------------------|-----------------------------------------------------------|
| Ethinylestradiol + levonorgestrel  | Midwife             | 83146  | 45.1                                      | 84.8                               | 10.9                                 | 82.1                                                      |
|                                    | Physician           | 14914  | 35.7                                      | 15.2                               | 8.8                                  | 77.4                                                      |
|                                    | All prescribers     | 98060  | 40.5                                      | 100.0                              | 10.6                                 | 81.4                                                      |
| Ethinylestradiol + drospirenone    | Midwife             | 16461  | 8.9                                       | 65.5                               | 7.0                                  | 83.3                                                      |
|                                    | Physician           | 8686   | 20.8                                      | 34.5                               | 5.8                                  | 77.2                                                      |
|                                    | All prescribers     | 25147  | 11.2                                      | 100.0                              | 6.6                                  | 81.2                                                      |
| Desogestrel only                   | Midwife             | 47035  | 25.5                                      | 85.2                               | 14.7                                 | 71.7                                                      |
|                                    | Physician           | 8139   | 19.5                                      | 14.8                               | 12.0                                 | 70.0                                                      |
|                                    | All prescribers     | 55174  | 25.6                                      | 100.0                              | 14.3                                 | 71.5                                                      |
| Other oral hormonal contraceptives | Midwife             | 19121  | 10.4                                      | 79.8                               | 12.9                                 | 76.8                                                      |
|                                    | Physician           | 4827   | 11.6                                      | 20.2                               | 11.2                                 | 72.4                                                      |
|                                    | All prescribers     | 23948  | 10.7                                      | 100.0                              | 12.6                                 | 75.9                                                      |
| All hormonal contraceptives        | Midwife             | 184446 | 100.0                                     | 81.5                               | 11.8                                 | 78.7                                                      |
|                                    | Physician           | 41758  | 100.0                                     | 18.5                               | 9.1                                  | 75.1                                                      |
|                                    | All prescribers     | 226204 | 100.0                                     | 100                                | 11.3                                 | 78.0                                                      |

## DISCUSSION

In this nationwide population-based cohort study we found that the most prescribed and dispensed hormonal contraceptives during the study period were COC containing ethinylestradiol + levonorgestrel, desogestrel-only and COC with ethinylestradiol + drospirenone. Women who received an initial prescription of ethinylestradiol combined with either levonorgestrel or drospirenone were more prone to continue with the same drug. On the contrary, women who received desogestrel-only as the initial prescribed and dispensed hormonal contraceptive had 35 % higher probability to choose another type of contraceptive within 6 months of use. Women who originally had received ethinylestradiol + drospirenone were the least likely to switch contraceptive drug during the same period of time.

The Swedish Medical Products Agency (MPA) recommends levonorgestrel containing combined pills as the first choice when prescribing oral contraceptives. Our results show that prescribers most often follow these recommendations. But, the prescription pattern in Sweden differs from most other countries as desogestrel-only pills have a high market share of approximately 25% (13) compared to 4,5% in Denmark and 0.3% in the United States (14, 15).

The clinical implications of our findings are important as side effects or other reasons for discontinuation or switching between different contraceptives increase the risk for unwanted pregnancies. Oral desogestrel-only contraceptives have become a common choice due to fear of the increased risk for venous thromboses in both women who use combined hormonal contraception and prescribers who use combined hormonal contraception. However, an irregular bleeding pattern which is more frequent among users of progestin-only formulations might be a reason for the higher percentage of switchers or discontinuation in this group. Therefore, when prescribing hormonal contraceptives it is necessary to thoroughly evaluate each woman's individual risk for venous thrombosis and also provide a balanced and knowledge based information on the size of these risks.

COCs are associated with a number of positive health effects, for example decreased menstrual blood loss and improvement in dysmenorrhoea and acne. It has previously been demonstrated that positive health effects in addition to the contraceptive effect most likely will increase continuation rates (16). This may very well contribute to the fact that women on COCs were more prone to continue use of the initial prescribed product as compared with women using POP, although the vast majority of women are prescribed COCs for contraception and not primarily for medical reasons..

We found that among midwives desogestrel-only was the second most common prescribed hormonal contraceptive. At the same time and especially among the youngest group of women, 16 – 19 years, the percentage of switchers was the highest.



1  
2  
3 Cerazette® (desogestrel 75µg) was registered in Sweden 2001 and the number of users, especially in the  
4 younger age categories increased rapidly during the following years. During the same time, the number of  
5 teenage abortions increased (17) and it can be speculated that the problem with bleeding control associated  
6 with progestin-only methods have led to lower continuation rates in this group of users and as a  
7 consequence an increased risk of unprotected intercourse leading to unwanted pregnancies.  
8

9  
10  
11 During the past five years there has been an intense debate concerning a possible difference in the  
12 thromboembolic risk between COC containing levonorgestrel- and drospirenone. Retrospective studies  
13 have found an increased risk in women using ethinylestradiol + drospirenone compared with  
14 ethinylestradiol + levonorgestrel (18-21). However these results have been contradicted by results from  
15 prospective studies (2225). When transforming results from this kind of studies into clinical  
16 recommendations, the question of continuation/discontinuation is crucial. A possible small increase in risk  
17 may be balanced by higher continuation rates. The results from the present study indicate a more  
18 favourable profile for COC containing drospirenone when it comes to continuation rates. To our best  
19 knowledge this has not previously been shown. A possible more favourable thromboembolic risk profile  
20 with a COC containing ethinylestradiol + levonorgestrel may be counteracted by lower continuation rates  
21 compared with pills containing drospirenone and a possible increased risk of unintended pregnancies. As  
22 the risk of venous thromboembolism increases rapidly already during early pregnancy this must be taken  
23 into account.  
24

25  
26  
27 A substantial number of women had no second dispensation in six months of any contraceptive product  
28 (table 1). The design of the present study does not provide any information on this group and we cannot  
29 draw any conclusions. We can, however, speculate that most probably the group is a mix of women  
30 stopping contraceptive use and women switching to a non-hormonal contraceptive method. The use of  
31 copper-IUDs is widespread in Sweden and the register used in this study does not provide information on  
32 copper-IUD use as this is not a pharmaceutical product. As COC with ethinylestradiol + drospirenone is  
33 second-line treatment in Sweden, it seems reasonable that this group is bigger. The actual number of  
34 women who discontinued without switching to a non-hormonal method is unknown.  
35

36  
37  
38 Some of the women considered as first time users actually could have been using the same contraceptive  
39 before the period of the study. For various reasons these women may have stopped their use and later on  
40 started again. This would most likely occur in the older age groups. If so, these women would be expected  
41 to have higher continuation rates than the younger women. As this is not the case (table 1), we do not  
42 consider this as a major source of bias.  
43  
44  
45  
46  
47  
48  
49  
50  
51  
52  
53  
54

### 55 56 57 58 **Strengths and limitations of the study** 59 60

1  
2  
3 The Swedish Prescribed Drug Register covers all drugs dispensed from all Swedish pharmacies since July  
4 2005. Since sale information is transferred directly from the cashier to the register, data is complete and  
5 results in a high external validity for the register.  
6

7  
8 A further strength is that the large amount of data gives a high precision to the point estimates. These  
9 factors are the usual strengths in register research together with avoidance of errors arising out of recall  
10 bias, which is a common problem arising when the data used have been collected from interviews and  
11 questionnaires.  
12

13  
14 We have not been able to control for a wish to become pregnant in this study. A lowered rate of “repeated  
15 prescription and dispensation identical to the first” may to some extent be an effect of plans to become  
16 pregnant. Therefore, the percentage rates for “repeated prescription and dispensation identical to the first”  
17 might be somewhat difficult to interpret. However, the RR estimates are useful since there is no reasonable  
18 explanation of the choice made by women to use desogestrel-only as an initial formulation to a greater  
19 extent because these women might be more prone to become pregnant.  
20  
21

## 22 **Conclusion**

23  
24 The three most common types of initially prescribed hormonal contraceptive in Sweden are from most to  
25 least common: ethinylestradiol + levonorgestrel (43.3 %), desogestrel-only (24.4 %) and ethinylestradiol +  
26 drospirenone (11.1 %). Of these drugs, desogestrel-only users were most likely to switch to another drug  
27 during the first six months with 14.3% changing. The RR for this type of change was 1.35, compared to  
28 ethinylestradiol + levonorgestrel. Women using drospirenone-containing COC were less likely to switch  
29 within six months than women using levonorgestrel-containing COC (RR 0.63; 0.59-0.66). The  
30 prescription pattern concerning the women’s continuation rates differed overall only slightly between the  
31 physicians’ and the midwives’, although there was a lowered prescription and dispensation rate of  
32 ethinylestradiol + drospirenone by midwives compared to physicians. These findings may be of clinical  
33 importance when tailoring hormonal contraceptives on an individual basis.  
34  
35  
36  
37  
38  
39  
40  
41  
42  
43  
44  
45  
46  
47  
48  
49  
50  
51  
52  
53  
54  
55  
56  
57  
58  
59  
60

## REFERENCES

1. Trussell J. Understanding contraceptive failure. *Best Pract Res Clin Obstet Gynaecol* 2009;23:199-209.
2. Lindh I, Blohm F, Andersson-Ellström E, Milsom I. Contraceptive use and pregnancy outcome in three generations of Swedish female teenagers from the same urban population. *Contraception* 2009;80: 163–169.
3. [Larsson M](#), [Tydén T](#), [Hanson U](#), [Häggström-Nordin E](#) Contraceptive use and associated factors among Swedish high school students. *Eur J Contracept Reprod Health Care* 2007;12:119-24.
4. [Lawrie TA](#), [Helmerhorst FM](#), [Maitra NK](#), [Kulier R](#), [Bloemenkamp K](#), [Gülmezoglu AM](#). Types of progestogens in combined oral contraception: effectiveness and side-effects. *Cochrane Database Syst Rev* 2011;11:CD004861.
5. [Maitra N](#), [Kulier R](#), [Bloemenkamp KW](#), [Helmerhorst FM](#), [Gülmezoglu AM](#). Progestogens in combined oral contraceptives for contraception. *Cochrane Database Syst Rev*. 2004;3:CD004861. Update in [Cochrane Database Syst Rev](#) 011;5:CD004861.
6. [Foster DG](#), [Parvataneni R](#), [de Bocanegra HT](#), [Lewis C](#), [Bradsberry M](#), [Darney P](#). Number of oral contraceptive pill packages dispensed, method continuation, and costs. *Obstet Gynecol* 2006;108:1107-14.
7. [Potter JE](#), [McKinnon S](#), [Hopkins K](#), [Amastae J](#), [Shedlin MG](#), [Powers DA](#), [Grossman D](#). Continuation of prescribed compared with over-the-counter oral contraceptives. *Obstet Gynecol* 2011;117:551-7.
8. [Sucato GS](#), [Land SR](#), [Murray PJ](#), [Cecchini R](#), [Gold MA](#). Adolescents' experiences using the contraceptive patch versus pills. *J Pediatr Adolesc Gynecol* 2011;24:197-203.
9. [Murphy PA](#), [Brixner D](#). Hormonal contraceptive discontinuation patterns according to formulation: investigation of associations in an administrative claims database. *Contraception* 2008;77:257-63
10. [Van Vliet HA](#), [Grimes DA](#), [Lopez LM](#), [Schulz KF](#), [Helmerhorst FM](#). Triphasic versus monophasic oral contraceptives for contraception. *Cochrane Database Syst Rev* 2011; 9:CD003553.
11. Wettermark B, Hammar N, Fored CM, Leimanis A, Otterblad Olausson P, Bergman U, Persson I, Sundström A, Westerholm B, Rosén M. The new Swedish Prescribed Drug Register-opportunities for pharmacoepidemiological research and experience from the first six months. *Pharmacoepidemiol Drug Saf* 2007;16:726-35.

12. Kirkwood BR, Sterne JAC, Essential Medical Statistics. Second ed. *Blackwell Science Ltd, Oxford*, 2003.
13. Swedish National Board of Health and Welfare;  
<http://www.socialstyrelsen.se/statistik/statistikdatabas>. Retrieved December 2012
14. Wilson NM, Laursen M, Lidegaard Ø. [Oral contraception in Denmark 1998-2010](#). *Acta Obstet Gynecol Scand*. 2012;91:810-5.
15. Hall KS, Trussell J, Schwarz EB. Progestin-only contraceptive pill use among women in the United States. *Contraception* 2012;86:653-8
16. Swedish National Board of Health and Welfare;  
<http://www.socialstyrelsen.se/statistik/statistikefteramne/aborter>. Retrieved November 2012
17. Robinson JC, Plichta S, Weisman CS, Nathanson CA, Ensminger M. Dysmenorrhea and use of oral contraceptives in adolescent women attending a family planning clinic. *Am J Obstet Gynecol*. 1992 Feb;166(2):578-83
18. Lidegaard O, Nielsen LH, Skovlund CW, Løkkegaard E. Venous thrombosis in users of non-hormonal contraception: follow-up study, Denmark 2001-10. *BMJ* 2012;344:e2990.
19. Jick SS, Hernandez RK. [Risk of non-fatal venous thromboembolism in women using oral contraceptives containing drospirenone compared with women using oral contraceptives containing levonorgestrel: case-control study using United States claims data](#). *BMJ* 2011;342:d2151. doi: 10.1136/bmj.d2151
20. [Parkin L](#), [Sharples K](#), [Hernandez RK](#), Jick SS. Risk of venous thromboembolism in users of oral contraceptives containing drospirenone or levonorgestrel: nested case-control study based on UK General Practice Research Database. *BMJ* 2011;342:d2139. doi: 10.1136/bmj.d2139.
21. Lidegaard Ø, [Milsom I](#), [Geirsson RT](#), [Skjeldestad FE](#). Hormonal contraception and venous thromboembolism. *Acta Obstet Gynecol Scand* 2012;9:769-78.
22. [Dinger JC](#), [Heinemann LA](#), [Kühl-Habich D](#). The safety of a drospirenone-containing oral contraceptive: final results from the European Active Surveillance Study on oral contraceptives based on 142,475 women-years of observation. *Contraception* 2007;75:344-54.

- 1  
2  
3 23. Dinger J, [Assmann A](#), [Möhner S](#), [Minh TD](#). Risk of venous thromboembolism and the use of  
4 dienogest- and drospirenone-containing oral contraceptives: results from a German case-control  
5 study. *J Fam Plann Reprod Health Care* 2010;36:123-9.  
6  
7  
8  
9 24. [Shapiro S](#), Dinger J. Risk of venous thromboembolism among users of oral contraceptives: a review  
10 of two recently published studies. *J Fam Plann Reprod Health Care* 2010;36:33-8.  
11  
12  
13 25. Dinger J, [Shapiro S](#). Combined oral contraceptives, venous thromboembolism, and the problem of  
14 interpreting large but incomplete datasets. *J Fam Plann Reprod Health Care* 2012;38:2-6  
15  
16  
17  
18  
19  
20  
21  
22  
23  
24  
25  
26  
27  
28  
29  
30  
31  
32  
33  
34  
35  
36  
37  
38  
39  
40  
41  
42  
43  
44  
45  
46  
47  
48  
49  
50  
51  
52  
53  
54  
55  
56  
57  
58  
59  
60

## CONTRIBUTORS

AJ and JB planned the study, supervised the analysis, interpreted the results, and wrote the manuscript. AJ is guarantor of the study.

ABW planned the study, prepared all data from the Swedish Prescribed Drug Register, made the statistical analyses and interpreted the results.

ML and AF interpreted the results, and revised the manuscript.

All authors discussed and approved the final manuscript.

AJ and JB decided when and where to attempt publication.

**Funding:** The expenses were covered by the County Council of Östergötland, Sweden.

**Competing interests:** All authors have completed the ICMJE uniform disclosure form at [www.icmje.org/coi\\_disclosure.pdf](http://www.icmje.org/coi_disclosure.pdf) (available on request from the corresponding author) and declare: no support from any organisation for the submitted work.

JB report financial relations to MSD Sweden and Bayer AB, Sweden (see attached declaration). The other investigators declared no financial relationships with any organisations that might have an interest in the submitted work in the previous three years, and no other relationships or activities that could appear to have influenced the submitted work.

**Ethical approval:** This study was approved by the Regional Ethical Review Board, Linköping, Sweden (Dnr M125-08).

**Data sharing:** No additional data available.

1  
2  
3  
4  
5  
6  
7  
8  
9  
10  
11  
12  
13  
14  
15  
16  
17  
18  
19  
20  
21  
22  
23  
24  
25  
26  
27  
28  
29  
30  
31  
32  
33  
34  
35  
36  
37  
38  
39  
40  
41  
42  
43  
44  
45  
46  
47  
48  
49  
50  
51  
52  
53  
54  
55  
56  
57  
58  
59  
60**What is already known on this topic**

Compliance and adherence to contraceptive use is almost always overestimated in clinical trials. Data on difference in compliance and adherence between different formulations of oral contraception is lacking or of poor quality. Knowledge of adherence and compliance is essential when it comes to avoid unintended pregnancies.

**What this study adds**

Users of progestin-only pills more frequently choose another hormonal contraceptive method or discontinue use within six months. Users of drospirenone containing combined oral contraceptives were the least likely to switch method. The results indicate a more favourable profile concerning adherence to treatment for drospirenone containing combined oral contraceptives. This may be of clinical interest when it comes to a decision of what type of oral contraceptives the individual woman should be recommended.

STROBE Statement – checklist of items that should be included in reports of observational studies.

|     |                                                                                                                                                                                                                                                                                     |
|-----|-------------------------------------------------------------------------------------------------------------------------------------------------------------------------------------------------------------------------------------------------------------------------------------|
| 1a  | Done                                                                                                                                                                                                                                                                                |
| 1b  | Done                                                                                                                                                                                                                                                                                |
| 2   | Done                                                                                                                                                                                                                                                                                |
| 3   | <i>Intoduction</i> , last paragraph                                                                                                                                                                                                                                                 |
| 4   | <i>Method</i> , first sentence                                                                                                                                                                                                                                                      |
| 5   | <i>Method</i> , first and second paragraph                                                                                                                                                                                                                                          |
| 6a  | <i>Method</i> , first and second paragraph                                                                                                                                                                                                                                          |
| 6b  | We consider this as not relevant                                                                                                                                                                                                                                                    |
| 7   | In <i>Statistical analysis</i> , there are descriptions of the variables: “age groups”, “changing type” and “using same drug after 6 months”                                                                                                                                        |
| 8   | Not relevant – all information is from the Swedish Prescribed Drug Register                                                                                                                                                                                                         |
| 9   | In this study with an intention to solely describe the switching/ continuation rate and not to explain its underlying causes, the risk of presenting biased results is not an immediate problem. Especially not since we consider the external validity in this study as very high. |
| 10  | We consider this as not relevant                                                                                                                                                                                                                                                    |
| 11  | <i>Statistical analyses</i>                                                                                                                                                                                                                                                         |
| 12a | Relative risks together with 95% CIs are used for the analyses, and its composition in terms of risk outcome and reference category in the ratio as well as CI interval calculations are presented in <i>Statistical analysis</i> .                                                 |
| 12b | We consider this as not relevant                                                                                                                                                                                                                                                    |
| 12c | We have used register data with a most probable complete registration (see <i>Strengths and limitations of the study</i> )                                                                                                                                                          |
| 12d | Please see item 12c                                                                                                                                                                                                                                                                 |
| 12e | We have previously calculated the proportions for switching product within 12 months and found the pattern quite similar.                                                                                                                                                           |
| 13a | See table 1 and table 2                                                                                                                                                                                                                                                             |
| 13b | We consider this as not relevant                                                                                                                                                                                                                                                    |
| 13c | We believe that the description of inclusion is rather uncomplicated and that the description in <i>Method</i> , first and paragraph is easy to follow.                                                                                                                             |
| 14a | We have not included data on such information in this study                                                                                                                                                                                                                         |
| 14b | There are no missing data in our chosen variables                                                                                                                                                                                                                                   |
| 14c | The follow-up time is exactly six months for each woman in the study.                                                                                                                                                                                                               |
| 15  | Please see table 1 and table 2                                                                                                                                                                                                                                                      |
| 16a | Please see table 1                                                                                                                                                                                                                                                                  |
| 16b | Please see <i>Statistical analyses</i>                                                                                                                                                                                                                                              |
| 16c | Please see table 1                                                                                                                                                                                                                                                                  |
| 17  | We consider this as not relevant                                                                                                                                                                                                                                                    |
| 18  | <i>Discussion</i> , first paragraph                                                                                                                                                                                                                                                 |
| 19  | Please see <i>Strengths and limitations of the study</i>                                                                                                                                                                                                                            |
| 20  | <i>Conclusion</i>                                                                                                                                                                                                                                                                   |
| 21  | Very high external validity (see <i>Strengths and limitations of the study</i> )                                                                                                                                                                                                    |
| 22  | No funding                                                                                                                                                                                                                                                                          |





## ICMJE Form for Disclosure of Potential Conflicts of Interest

### Section 1. Identifying Information

1. Given Name (First Name)

Ann

2. Surname (Last Name)

Josefsson

3. Date

13-June-2013

4. Are you the corresponding author?

Yes  No

5. Manuscript Title

Patterns of adherence to oral hormonal contraceptives in a cohort of first time users: a population based registry study, Sweden 2005-2010

6. Manuscript Identifying Number (if you know it)

### Section 2. The Work Under Consideration for Publication

Did you or your institution **at any time** receive payment or services from a third party (government, commercial, private foundation, etc.) for any aspect of the submitted work (including but not limited to grants, data monitoring board, study design, manuscript preparation, statistical analysis, etc.)?

Are there any relevant conflicts of interest?  Yes  No

### Section 3. Relevant financial activities outside the submitted work.

Place a check in the appropriate boxes in the table to indicate whether you have financial relationships (regardless of amount of compensation) with entities as described in the instructions. Use one line for each entity; add as many lines as you need by clicking the "Add +" box. You should report relationships that were **present during the 36 months prior to publication**.

Are there any relevant conflicts of interest?  Yes  No

### Section 4. Intellectual Property -- Patents & Copyrights

Do you have any patents, whether planned, pending or issued, broadly relevant to the work?  Yes  No



## ICMJE Form for Disclosure of Potential Conflicts of Interest

### Section 5. Relationships not covered above

Are there other relationships or activities that readers could perceive to have influenced, or that give the appearance of potentially influencing, what you wrote in the submitted work?

- Yes, the following relationships/conditions/circumstances are present (explain below):
- No other relationships/conditions/circumstances that present a potential conflict of interest

At the time of manuscript acceptance, journals will ask authors to confirm and, if necessary, update their disclosure statements. On occasion, journals may ask authors to disclose further information about reported relationships.

### Section 6. Disclosure Statement

Based on the above disclosures, this form will automatically generate a disclosure statement, which will appear in the box below.

### Evaluation and Feedback

Please visit <http://www.icmje.org/cgi-bin/feedback> to provide feedback on your experience with completing this form.

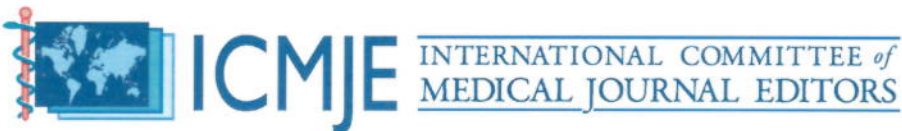

## ICMJE Form for Disclosure of Potential Conflicts of Interest

### Section 1. Identifying Information

|                                                                                                                                                                   |                                                                     |                                              |
|-------------------------------------------------------------------------------------------------------------------------------------------------------------------|---------------------------------------------------------------------|----------------------------------------------|
| 1. Given Name (First Name)<br>Ann-Britt                                                                                                                           | 2. Surname (Last Name)<br>Wirehn                                    | 3. Date<br>13-June-2013                      |
| 4. Are you the corresponding author?                                                                                                                              | <input type="checkbox"/> Yes <input checked="" type="checkbox"/> No | Corresponding Author's Name<br>Ann Josefsson |
| 5. Manuscript Title<br>Patterns of adherence to oral hormonal contraceptives in a cohort of first time users: a population based registry study, Sweden 2005-2010 |                                                                     |                                              |
| 6. Manuscript Identifying Number (if you know it)                                                                                                                 |                                                                     |                                              |

### Section 2. The Work Under Consideration for Publication

Did you or your institution **at any time** receive payment or services from a third party (government, commercial, private foundation, etc.) for any aspect of the submitted work (including but not limited to grants, data monitoring board, study design, manuscript preparation, statistical analysis, etc.)?

Are there any relevant conflicts of interest?  Yes  No

### Section 3. Relevant financial activities outside the submitted work.

Place a check in the appropriate boxes in the table to indicate whether you have financial relationships (regardless of amount of compensation) with entities as described in the instructions. Use one line for each entity; add as many lines as you need by clicking the "Add +" box. You should report relationships that were **present during the 36 months prior to publication**.

Are there any relevant conflicts of interest?  Yes  No

### Section 4. Intellectual Property -- Patents & Copyrights

Do you have any patents, whether planned, pending or issued, broadly relevant to the work?  Yes  No

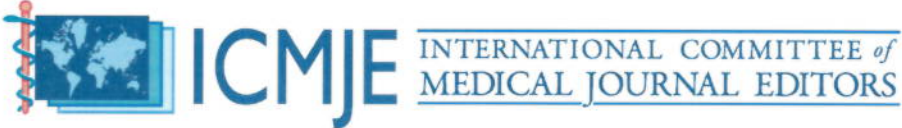

## ICMJE Form for Disclosure of Potential Conflicts of Interest

### Section 5. Relationships not covered above

Are there other relationships or activities that readers could perceive to have influenced, or that give the appearance of potentially influencing, what you wrote in the submitted work?

- Yes, the following relationships/conditions/circumstances are present (explain below):
- No other relationships/conditions/circumstances that present a potential conflict of interest

At the time of manuscript acceptance, journals will ask authors to confirm and, if necessary, update their disclosure statements. On occasion, journals may ask authors to disclose further information about reported relationships.

### Section 6. Disclosure Statement

Based on the above disclosures, this form will automatically generate a disclosure statement, which will appear in the box below.

### Evaluation and Feedback

Please visit <http://www.icmje.org/cgi-bin/feedback> to provide feedback on your experience with completing this form.



## ICMJE Form for Disclosure of Potential Conflicts of Interest

### Section 1. Identifying Information

|                                                                                                                                                                   |                                                                     |                                              |
|-------------------------------------------------------------------------------------------------------------------------------------------------------------------|---------------------------------------------------------------------|----------------------------------------------|
| 1. Given Name (First Name)<br>Malou                                                                                                                               | 2. Surname (Last Name)<br>Lindberg                                  | 3. Date<br>13-June-2013                      |
| 4. Are you the corresponding author?                                                                                                                              | <input type="checkbox"/> Yes <input checked="" type="checkbox"/> No | Corresponding Author's Name<br>Ann Josefsson |
| 5. Manuscript Title<br>Patterns of adherence to oral hormonal contraceptives in a cohort of first time users: a population based registry study, Sweden 2005-2010 |                                                                     |                                              |
| 6. Manuscript Identifying Number (if you know it)                                                                                                                 |                                                                     |                                              |

### Section 2. The Work Under Consideration for Publication

Did you or your institution **at any time** receive payment or services from a third party (government, commercial, private foundation, etc.) for any aspect of the submitted work (including but not limited to grants, data monitoring board, study design, manuscript preparation, statistical analysis, etc.)?

Are there any relevant conflicts of interest?  Yes  No

### Section 3. Relevant financial activities outside the submitted work.

Place a check in the appropriate boxes in the table to indicate whether you have financial relationships (regardless of amount of compensation) with entities as described in the instructions. Use one line for each entity; add as many lines as you need by clicking the "Add +" box. You should report relationships that were **present during the 36 months prior to publication**.

Are there any relevant conflicts of interest?  Yes  No

### Section 4. Intellectual Property -- Patents & Copyrights

Do you have any patents, whether planned, pending or issued, broadly relevant to the work?  Yes  No



## ICMJE Form for Disclosure of Potential Conflicts of Interest

### Section 5. Relationships not covered above

Are there other relationships or activities that readers could perceive to have influenced, or that give the appearance of potentially influencing, what you wrote in the submitted work?

- Yes, the following relationships/conditions/circumstances are present (explain below):
- No other relationships/conditions/circumstances that present a potential conflict of interest

At the time of manuscript acceptance, journals will ask authors to confirm and, if necessary, update their disclosure statements. On occasion, journals may ask authors to disclose further information about reported relationships.

### Section 6. Disclosure Statement

Based on the above disclosures, this form will automatically generate a disclosure statement, which will appear in the box below.

### Evaluation and Feedback

Please visit <http://www.icmje.org/cgi-bin/feedback> to provide feedback on your experience with completing this form.



## ICMJE Form for Disclosure of Potential Conflicts of Interest

### Section 5. Relationships not covered above

Are there other relationships or activities that readers could perceive to have influenced, or that give the appearance of potentially influencing, what you wrote in the submitted work?

- Yes, the following relationships/conditions/circumstances are present (explain below):
- No other relationships/conditions/circumstances that present a potential conflict of interest

At the time of manuscript acceptance, journals will ask authors to confirm and, if necessary, update their disclosure statements. On occasion, journals may ask authors to disclose further information about reported relationships.

### Section 6. Disclosure Statement

Based on the above disclosures, this form will automatically generate a disclosure statement, which will appear in the box below.

### Evaluation and Feedback

Please visit <http://www.icmje.org/cgi-bin/feedback> to provide feedback on your experience with completing this form.

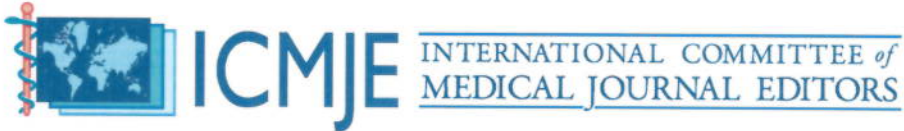

## ICMJE Form for Disclosure of Potential Conflicts of Interest

### Section 1. Identifying Information

|                                                                                                                                                                   |                                                                     |                                              |
|-------------------------------------------------------------------------------------------------------------------------------------------------------------------|---------------------------------------------------------------------|----------------------------------------------|
| 1. Given Name (First Name)<br>Annika                                                                                                                              | 2. Surname (Last Name)<br>Foldemo                                   | 3. Date<br>13-June-2013                      |
| 4. Are you the corresponding author?                                                                                                                              | <input type="checkbox"/> Yes <input checked="" type="checkbox"/> No | Corresponding Author's Name<br>Ann Josefsson |
| 5. Manuscript Title<br>Patterns of adherence to oral hormonal contraceptives in a cohort of first time users: a population based registry study, Sweden 2005-2010 |                                                                     |                                              |
| 6. Manuscript Identifying Number (if you know it)                                                                                                                 |                                                                     |                                              |

### Section 2. The Work Under Consideration for Publication

Did you or your institution **at any time** receive payment or services from a third party (government, commercial, private foundation, etc.) for any aspect of the submitted work (including but not limited to grants, data monitoring board, study design, manuscript preparation, statistical analysis, etc.)?

Are there any relevant conflicts of interest?  Yes  No

### Section 3. Relevant financial activities outside the submitted work.

Place a check in the appropriate boxes in the table to indicate whether you have financial relationships (regardless of amount of compensation) with entities as described in the instructions. Use one line for each entity; add as many lines as you need by clicking the "Add +" box. You should report relationships that were **present during the 36 months prior to publication**.

Are there any relevant conflicts of interest?  Yes  No

### Section 4. Intellectual Property -- Patents & Copyrights

Do you have any patents, whether planned, pending or issued, broadly relevant to the work?  Yes  No





## ICMJE Form for Disclosure of Potential Conflicts of Interest

### Section 1. Identifying Information

|                                                                                                                                                                   |                                       |                             |
|-------------------------------------------------------------------------------------------------------------------------------------------------------------------|---------------------------------------|-----------------------------|
| 1. Given Name (First Name)<br>Jan                                                                                                                                 | 2. Surname (Last Name)<br>Brynhildsen | 3. Date<br>13-June-2013     |
| 4. Are you the corresponding author? <input type="checkbox"/> Yes <input checked="" type="checkbox"/> No                                                          |                                       |                             |
|                                                                                                                                                                   |                                       | Corresponding Author's Name |
| 5. Manuscript Title<br>Patterns of adherence to oral hormonal contraceptives in a cohort of first time users: a population based registry study, Sweden 2005-2010 |                                       |                             |
| 6. Manuscript Identifying Number (if you know it)                                                                                                                 |                                       |                             |

### Section 2. The Work Under Consideration for Publication

Did you or your institution at **any time** receive payment or services from a third party (government, commercial, private foundation, etc.) for any aspect of the submitted work (including but not limited to grants, data monitoring board, study design, manuscript preparation, statistical analysis, etc.)?

Are there any relevant conflicts of interest?  Yes  No

### Section 3. Relevant financial activities outside the submitted work.

Place a check in the appropriate boxes in the table to indicate whether you have financial relationships (regardless of amount of compensation) with entities as described in the instructions. Use one line for each entity; add as many lines as you need by clicking the "Add +" box. You should report relationships that were **present during the 36 months prior to publication**.

Are there any relevant conflicts of interest?  Yes  No

If yes, please fill out the appropriate information below.

| Name of Entity | Grant?                   | Personal Fees?                      | Non-Financial Support?   | Other?                   | Comments |
|----------------|--------------------------|-------------------------------------|--------------------------|--------------------------|----------|
|                | <input type="checkbox"/> | <input checked="" type="checkbox"/> | <input type="checkbox"/> | <input type="checkbox"/> | Se below |

### Section 4. Intellectual Property -- Patents & Copyrights

Do you have any patents, whether planned, pending or issued, broadly relevant to the work?  Yes  No



## ICMJE Form for Disclosure of Potential Conflicts of Interest

### Section 5. Relationships not covered above

Are there other relationships or activities that readers could perceive to have influenced, or that give the appearance of potentially influencing, what you wrote in the submitted work?

Yes, the following relationships/conditions/circumstances are present (explain below):

No other relationships/conditions/circumstances that present a potential conflict of interest

#### Competing interests:

Jan Brynhildsen (JB) has been reimbursed by Merck Sharpe & Dohme (MSD), Sweden, the manufacturer of desogestrel-containing contraceptives in Sweden, for running educational programmes and giving lectures. JB has also been paid by Bayer AB, Sweden, the manufacturer of some of the levonorgestrel-containing contraceptives and all drospirenone-containing combined oral contraceptives available in Sweden, for giving lectures.

JB has also been the member of the Swedish medical advisory board of MSD between 2008 and 2012.

At the time of manuscript acceptance, journals will ask authors to confirm and, if necessary, update their disclosure statements. On occasion, journals may ask authors to disclose further information about reported relationships.

### Section 6. Disclosure Statement

Based on the above disclosures, this form will automatically generate a disclosure statement, which will appear in the box below.

#### Competing interests:

Jan Brynhildsen (JB) has been reimbursed by Merck Sharpe & Dohme (MSD), Sweden, the manufacturer of desogestrel-containing contraceptives in Sweden, for running educational programmes and giving lectures. JB has also been paid by Bayer AB, Sweden, the manufacturer of some of the levonorgestrel-containing contraceptives and all drospirenone-containing combined oral contraceptives available in Sweden, for giving lectures.

JB has also been the member of the Swedish medical advisory board of MSD between 2008 and 2012.

### Evaluation and Feedback

Please visit <http://www.icmje.org/cgi-bin/feedback> to provide feedback on your experience with completing this form.

1  
2  
3  
4  
5  
6  
7 **Continuation rates of ~~Patterns of adherence to~~ oral hormonal**  
8 **contraceptives in a cohort of first time users: a population based registry**  
9 **study, Sweden 2005-2010**

11 Ann Josefsson Associate Professor, senior consultant<sup>1</sup>, Ann-Britt Wiréhn PhD, statistician<sup>1,2</sup>

13 Malou Lindberg Associate Professor<sup>2,3</sup>, Anniqa Foldemo PhD<sup>2,4</sup>, Jan Brynhildsen Associate  
15 Professor, senior consultant<sup>1</sup>

17 <sup>1</sup>Division of Obstetrics and Gynaecology, Department of Clinical and Experimental  
18 Medicine, Faculty of Health Sciences, Linköping University, Department of Obstetrics and  
19 Gynaecology in Linköping, County Council of Östergötland, Linköping, Sweden

21 <sup>2</sup>Local Health Care Research and Development Unit, County Council in Östergötland,  
22 Linköping, Sweden

24 <sup>3</sup>Department of Medical and Health Sciences, Primary Care, Linköping University,  
25 Linköping, Sweden

28 <sup>4</sup>Department of Medical and Health Sciences, Faculty of Health Sciences, Linköping  
29 University, Linköping, Sweden

33 Correspondence to:

35 ~~Jan Brynhildsen~~Ann Josefsson, Division of Obstetrics and Gynaecology,

36 Linköping University, Faculty of Health Sciences,

37 University Hospital,

38 SE-58185, Linköping, Sweden

41 [jan.brynhildsenann.josefsson@lio.se](mailto:jan.brynhildsenann.josefsson@lio.se)

43 [Tel: +46 10 1030000](tel:+46101030000)

45 Fax: +46 13 14 81 56

47  
48  
49 The Corresponding Author has the right to grant on behalf of all authors and does grant on  
50 behalf of all authors, an exclusive licence on a worldwide basis to the BMJ Publishing Group  
51 Ltd to permit this article (if accepted) to be published in BMJ editions and any other  
52 BMJPGJL products and sublicences such use and exploit all subsidiary rights, as set out in our  
53  
54

1  
2  
3  
4  
5  
6  
7  
8  
9  
10  
11  
12  
13  
14  
15  
16  
17  
18  
19  
20  
21  
22  
23  
24  
25  
26  
27  
28  
29  
30  
31  
32  
33  
34  
35  
36  
37  
38  
39  
40  
41  
42  
43  
44  
45  
46  
47  
48  
49  
50  
51  
52  
53  
54  
55  
56  
57  
58  
59  
60

licence.

**Key words:** Hormonal contraceptives; Oral contraceptives; Patient adherence; Registries ;  
Follow-up studies

**Word count:**

For peer review only

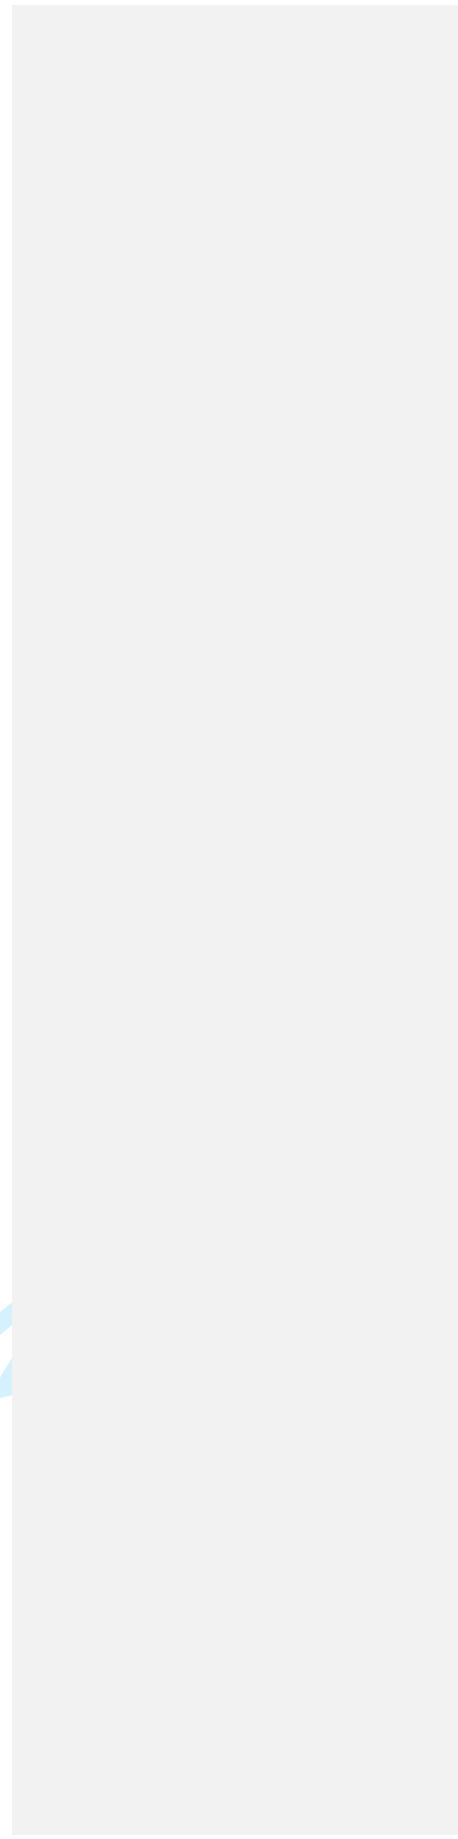

**ABSTRACT**

**Objective** To investigate if continuation rates in first-time users of oral hormonal contraceptives differed between different formulations and to measure if rates were related to prescribing categories, i.e. physicians and midwives.

**Design** A longitudinal national population-based registry study

**Setting** The Swedish prescribed drug register

**Participants** All females born 1977-1994 defined as first-time users of hormonal contraceptives from 2007 to 2009 (n = 226 211).

**Main outcome measures** Tendency to switch type of hormonal contraceptive within 6 months use and repeated dispensation identical to first were estimated as percentages and relative risks. Physicians' and midwives' prescription patterns concerning the women's continuation rates of oral hormonal contraceptive type.

**Results** In Sweden there were 782 375 women born 1977-1994 at the time of the study. Of these, 226 211 women were identified as first-time users of hormonal contraceptives. Ethinylestradiol + levonorgestrel, desogestrel-only and ethinylestradiol + drospirenone were the hormonal contraceptives most commonly dispensed for first-time users, 43.3 %, 24.4 % and 11.1 %, respectively. The overall rate of switching contraceptive type in the first six months was 11.3%, highest for desogestrel-only (14.3%) and lowest for ethinylestradiol + drospirenone (6.6 %). The switching rate for all three products was highest in 16-19 year age group. Having a repeated dispensation identical to the initial was highest for users of ethinylestradiol either combined with levonorgestrel or drospirenone, 81.4% and 81.2% respectively, whereas this rate for the initial desogestrel-only users was 71.5%. The RR of switching of contraceptive type within the first six months was 1.35 (95% CI: 1.32-1.39) for desogestrel-only and 0.63 (0.59-0.66) for ethinylestradiol + drospirenone compared to ethinylestradiol + levonorgestrel as reference category. The physicians' and midwives' prescription patterns concerning the women's continuation rates differed only slightly.

**Conclusion** Desogestrel-only users conferred the highest switcher rate to another hormonal contraceptive within a 6-months period. Users of ethinylestradiol + levonorgestrel were more prone to switch to another product within six months than women using ethinylestradiol + drospirenone. These findings may be of clinical importance when tailoring hormonal contraceptives on an individual basis.

## ARTICLE SUMMARY

### Article focus

- Continuation of ~~Compliance and adherence to~~ contraceptive uses is of outmost importance to avoid unintended pregnancies
- In Sweden, a change in prescription pattern has been observed, from combined oral contraceptives to progestin-only-pills, most probably due to media alarm
- Do continuation rates ~~adherence to treatment~~ differ between different formulations of combined oral contraceptives?

### Key messages

- Users of progestin-only pills more frequently choose another hormonal contraceptive method, or discontinue use within six months, than users of combined oral contraceptives
- Users of drospirenone containing combined oral contraceptives were the least likely to switch method

### Strengths and limitations of this study

- The Swedish Prescribed Drug Register covers all drugs dispensed from all Swedish pharmacies since July 2005. Since sale information is transferred directly from the cashier to the register, data is complete and results in a high external validity for the register
- The large amount of data gives a high precision to the point estimates.
- We have not been able to control for discontinuation due to a wish to become pregnant.

## INTRODUCTION

~~Adherence to treatment~~ ~~Compliance~~ and continuation of contraceptive use is crucial in the efforts to avoid unwanted pregnancies. Oral contraceptive (OC) use is however; generally characterized by ~~poor compliance, relatively high discontinuation rates and~~ low adherence ~~to treatment and relatively high discontinuation rates~~ (1). Reasons for ~~discontinuation and~~ poor adherence ~~and discontinuation~~ have been reported to be side effects but also the fear of side effects. Reported side effects include mood disturbances, decrease in libido, weight gain and poor bleeding control and the fear also includes the risk of venous thromboembolism (2, 3). Most of these reported side effects can be attributed to the progestogen component of the pill. Consequently, new progestogens with a potential of a more beneficial profile concerning side effects have been developed. Despite these improvements, discontinuation rates are still high.

A huge mass of studies has been performed, but there is only sparse evidence of differences in continuation rates between different types of -hormonal contraceptives. Type of progestogen (4, 5), number of oral contraceptive pill packages dispensed (6), prescription drug or over the counter (7) have all been proposed as determinants for continuation. Moreover, improvements of the formulations of combined hormonal contraceptives (COC) have been made in order to increase ~~continuation rates~~ ~~adherence~~. Such improvements include new routes of administration and different regimens, i.e. mono-, bi-, tri-, and four -phasic pills, patches and vaginal rings (8, 9). So far, there is only limited evidence that use of a specific formulation or route of administration, would be a better choice concerning continuation rates (4-9).

In several Cochrane reviews ~~concerning adherence and continuation rates~~, the authors have concluded that most studies are hampered either by design or by involvement of pharmaceutical companies and the results must therefore be interpreted with caution (4,5,10).

Actually, there is still a great need for studies emphasizing continuation/discontinuation ~~and risks of poor compliance~~ and ~~the following as a consequence a~~ risk of unintended pregnancies.

~~In Sweden, most contraceptives are prescribed by midwives. COC, progestin-only pills, implants, progestin-injectable (Depo-Provera<sup>®</sup>), hormonal-intruterine-system (Mirena<sup>®</sup>) but no combined hormonal injectable are available.~~

~~The prescription pattern in Sweden somewhat differs from most other countries as desogestrel-only pills have a very high market share and is the most commonly prescribed hormonal contraceptive. This is most probably an effect of media alarm and very cautious~~

Formatted: No underline, Font color: Auto, Not Highlight

Formatted: Not Highlight

Formatted: No underline, Font color: Auto, Not Highlight

1  
2  
3  
4  
5  
6  
7 recommendations by the Swedish Medical Products Agency. Poor bleeding control is,  
8 however, more common during POP-use and has been reported to be a common cause of  
9 discontinuation (2).  
10

Formatted: No underline, Font color: Auto,  
Not Highlight

11  
12  
13 We hypothesised that switching product within six months is more common among  
14 desogestrel-only users compared to users of etinylestradiol + levonorgestrel and that users of  
15 ethinylestradiol + drospirenonone are least prone to switch product within six months. The  
16 aim of the present study was to investigate if continuation rates in terms of repeated dispensed  
17 packages of the initially prescribed hormonal contraceptives differed between different  
18 formulations in a whole population. Secondly to measure if rates were related to prescribing  
19 categories, i.e. physicians and midwives.  
20  
21  
22  
23  
24  
25  
26  
27  
28  
29  
30  
31  
32  
33  
34  
35  
36  
37  
38  
39  
40  
41  
42  
43  
44  
45  
46  
47  
48  
49  
50  
51  
52  
53  
54  
55  
56  
57  
58  
59  
60



## METHODS

In this study, women identified as first-time users of hormonal contraceptives were treated as a cohort and followed for six months. Information on all women's prescribed and dispensed hormonal contraceptives from July 2005 to December 2010 was collected from the Swedish Prescribed Drug Register (11). The inclusion criteria for data extraction were: female born 1977-1994 with at least one dispensation of hormonal contraceptives at least once during the 5.5 year-period. The study population consisted of women without any dispensed hormonal contraceptive therapy in the 18 months between July 2005 - December 2006 but who had received at least one dispensation between January 2007-December 2009. This group was thus considered to be first-time users and constituted the study cohort in this study. Data from 2010 was used to identify those who had switched to a drug other than the first-dispensed drug after 2009 as well as those who had a second dispensation for the drug originally prescribed. Thus, 5.5 years data was used in this study.

The Swedish Prescribed Drug Register covers all drugs prescribed and dispensed for the entire Swedish population from June 2005 to the present. From this database we have obtained data on drugs having the Anatomical therapeutic chemical codes G03AA or G03AB (combined hormonal contraceptives) and G03AC (progestin only), from July 2005 to December 2010. We organized data by type for the three most common drugs, here referred to by their generic names: 1) ethinylestradiol + levonorgestrel, 2) ethinylestradiol + drospirenone and 3) desogestrel-only. The remaining hormonal contraceptives were placed in two other groups. The first, "Other oral contraceptives", included ethinylestradiol combined with either lynestrenol, norgestimat or desogestrel, and the progestin-only drugs norethisterone and lynestrenol). The second, "Other galenic forms", included intrauterine systems, transdermal patches, implants and injections. Although the correct designation for data from the Swedish Prescribed Drug Register is, "prescribed and dispensed" drugs, from now on the term used in this paper will be "dispensed" drugs.

### Statistical analysis

The number of women who received an initial hormonal contraceptive drug during the three-year period January 2007 - December 2009 is presented by drug type and age. The population was divided into four age groups: 16-19, 20-24, 25-28 and 16-28 years. The usage patterns are presented as numbers, percentages of total dispensations per product type and age group. Relative risks (RR) of either changing drug use or being prescribed the same drug were

1  
2  
3  
4  
5  
6  
7 calculated together with 95% confidence intervals for each group of oral contraceptives, with  
8 ethinylestradiol + levonorgestrel as the reference category. The CI tails were obtained using  
9 the normal distribution approximation and delta method to derive standard errors (12). Those  
10 who initially used long-acting contraceptive methods (intrauterine systems, implants and  
11 injections) were not included in the risk analysis since the results would not be relevant given  
12 the length of the period of data inclusion in this study.  
13

14  
15 As the majority of hormonal contraceptives in Sweden are prescribed by midwives, the usage  
16 pattern is also described in relation to prescribers, physician or midwife. Measures carried out  
17 divided on prescriber categories were the prescription distribution in percent within each  
18 prescriber category, and within each product type. The percentages of first-time users who  
19 switched to a new drug within 6 months of receiving the first and of those who continued to  
20 use the first drug are presented in relation to prescriber category.  
21  
22  
23  
24  
25  
26  
27  
28  
29  
30  
31  
32  
33  
34  
35  
36  
37  
38  
39  
40  
41  
42  
43  
44  
45  
46  
47  
48  
49  
50  
51  
52  
53  
54  
55  
56  
57  
58  
59  
60

## RESULTS

The Swedish census data 2010 showed that there were 782 375 women born between 1977 and 1994. The number of women who had used hormonal contraceptives at least once between July 2005 and December 2010 was 578 009 (~74%). After excluding those women who had a dispensation of OC during the first 18 months of the period, 226 211 were considered to be first-time users and were thus included in the statistical analyses.

The dispensation pattern for first-time users was: ethinylestradiol + levonorgestrel (43.3%), desogestrel-only (24.4%), and ethinylestradiol + drospirenone (11.1%) (Table 1). The percentage of first-time users who switched to a different drug before six months had elapsed was 11.3%. The rate was highest for desogestrel-only (14.3%) and lowest for ethinylestradiol + drospirenone (6.6 %). The group for whom a different drug was most often dispensed consisted of those 16-19 years of age and this was true for all three drugs. The 25-28 years of age group showed the lowest rate of change. The continuation rate, i.e. having a repeated dispensation identical to the initial, was highest for ethinylestradiol + levonorgestrel (81.4%) and ethinylestradiol + drospirenone (81.2%). The continuation rate for desogestrel-only was lower (71.5%). The rate of change decreased with age. The RR of switching to a different contraceptive within the first six months was 1.35 (95% CI: 1.32-1.39) for desogestrel-only and 0.63 (0.59-0.66) for ethinylestradiol + drospirenone where ethinylestradiol + levonorgestrel was used as the reference category. Hence, women using ethinylestradiol + drospirenone had the lowest RR for changing to a different type of hormonal contraceptive while those using desogestrel-only had the highest. Further, comparisons between the three formulations show that desogestrel-only users not only had the highest RR for changing to a different type of hormonal contraceptive but also the lowest RR for having a second dispensation identical to the first. The RR did neither vary by age group for changing the type of hormonal contraceptive during the first 6 months nor for having a repeated dispensation identical to first.

The physicians and midwives displayed essentially the same pattern of prescribing the second prescription for first-time users and no significant differences between categories were found. (Table 2). It is, however, worth noting that midwives prescribed the drug ethinylestradiol + drospirenone less often than physicians did. This drug was ranked as the fifth alternative choice for midwives and as the second alternative choice for physicians (in our five chosen groupings of hormonal contraceptives) (Table 2).

Table 1. Continuation rates in first time users of hormonal contraceptives in Sweden 2007-2009.

| Product type                       | Initial prescription and dispensation |        |            | Switching type before 6 months use |                    |               |             | Second prescription and dispensation identical to first |                    |               |             |
|------------------------------------|---------------------------------------|--------|------------|------------------------------------|--------------------|---------------|-------------|---------------------------------------------------------|--------------------|---------------|-------------|
|                                    | Age                                   | n      | % of total | n                                  | % per product type | Relative risk | (95% CI)    | n                                                       | % per product type | Relative risk | (95% CI)    |
| Ethinylestradiol + Levonorgestrel  | 16-19                                 | 73197  |            | 8234                               | 11.2               | 1 (reference) |             | 60945                                                   | 83.3               | 1 (reference) |             |
|                                    | 20-24                                 | 17140  |            | 1613                               | 9.4                |               |             | 13158                                                   | 76.8               |               |             |
|                                    | 25-28                                 | 7724   |            | 529                                | 6.8                |               |             | 5692                                                    | 73.7               |               |             |
|                                    | 16-28                                 | 98061  | 43.3       | 10376                              | 10.6               |               |             | 79795                                                   | 81.4               |               |             |
| Ethinylestradiol + Drospirenone    | 16-19                                 | 11604  |            | 952                                | 8.2                | 0.73          | (0.68-0.78) | 9845                                                    | 84.8               | 1.02          | (1.01-1.03) |
|                                    | 20-24                                 | 7889   |            | 433                                | 5.5                | 0.58          | (0.53-0.65) | 6261                                                    | 79.4               | 1.03          | (1.02-1.05) |
|                                    | 25-28                                 | 5655   |            | 279                                | 4.9                | 0.72          | (0.63-0.83) | 4317                                                    | 76.3               | 1.04          | (1.02-1.06) |
|                                    | 16-28                                 | 25148  | 11.1       | 1664                               | 6.6                | 0.63          | (0.59-0.66) | 20423                                                   | 81.2               | 1.00          | (0.99-1.00) |
| Desogestrel only                   | 16-19                                 | 29127  |            | 4977                               | 17.1               | 1.52          | (1.47-1.57) | 21797                                                   | 74.8               | 0.90          | (0.89-0.91) |
|                                    | 20-24                                 | 14172  |            | 1719                               | 12.1               | 1.29          | (1.21-1.37) | 9657                                                    | 68.1               | 0.89          | (0.88-0.90) |
|                                    | 25-28                                 | 11880  |            | 1206                               | 10.2               | 1.48          | (1.34-1.64) | 7989                                                    | 67.2               | 0.91          | (0.90-0.93) |
|                                    | 16-28                                 | 55179  | 24.4       | 7902                               | 14.3               | 1.35          | (1.32-1.39) | 39443                                                   | 71.5               | 0.88          | (0.87-0.88) |
| Other oral hormonal contraceptives | 16-28                                 | 23948  | 10.6       | 3016                               | 12.6               | 1.19          | (1.15-1.24) | 18179                                                   | 75.9               | 0.93          | (0.93-0.94) |
| Other galenic forms <sup>a</sup>   | 16-28                                 | 23875  | 10.6       |                                    |                    |               |             |                                                         |                    |               |             |
| Total                              | 16-28                                 | 226211 | 100.0      | 22958 <sup>c</sup>                 | 11.3 <sup>c</sup>  |               |             | 157840 <sup>c</sup>                                     | 78.0 <sup>c</sup>  |               |             |

<sup>a</sup> intrauterine systems, transdermal patches, implants and injections<sup>b</sup> irrelevant here as the treatment has long term effect<sup>c</sup> excluding Other galenic forms

Table 2. Prescription and dispensation in first time users of hormonal contraceptives in Sweden 2007-2009 per product type and prescriber category together with continuation rates.

| Product type                       | Prescriber category | n      | Distribution within prescriber category % | Distribution within product type % | Switching type before 6 months use % | Second prescription and dispensation identical to first % |
|------------------------------------|---------------------|--------|-------------------------------------------|------------------------------------|--------------------------------------|-----------------------------------------------------------|
| Ethinylestradiol + levonorgestrel  | Midwife             | 83146  | 45.1                                      | 84.8                               | 10.9                                 | 82.1                                                      |
|                                    | Physician           | 14914  | 35.7                                      | 15.2                               | 8.8                                  | 77.4                                                      |
|                                    | All prescribers     | 98060  | 40.5                                      | 100.0                              | 10.6                                 | 81.4                                                      |
| Ethinylestradiol + drospirenone    | Midwife             | 16461  | 8.9                                       | 65.5                               | 7.0                                  | 83.3                                                      |
|                                    | Physician           | 8686   | 20.8                                      | 34.5                               | 5.8                                  | 77.2                                                      |
|                                    | All prescribers     | 25147  | 11.2                                      | 100.0                              | 6.6                                  | 81.2                                                      |
| Desogestrel only                   | Midwife             | 47035  | 25.5                                      | 85.2                               | 14.7                                 | 71.7                                                      |
|                                    | Physician           | 8139   | 19.5                                      | 14.8                               | 12.0                                 | 70.0                                                      |
|                                    | All prescribers     | 55174  | 25.6                                      | 100.0                              | 14.3                                 | 71.5                                                      |
| Other oral hormonal contraceptives | Midwife             | 19121  | 10.4                                      | 79.8                               | 12.9                                 | 76.8                                                      |
|                                    | Physician           | 4827   | 11.6                                      | 20.2                               | 11.2                                 | 72.4                                                      |
|                                    | All prescribers     | 23948  | 10.7                                      | 100.0                              | 12.6                                 | 75.9                                                      |
| All hormonal contraceptives        | Midwife             | 184446 | 100.0                                     | 81.5                               | 11.8                                 | 78.7                                                      |
|                                    | Physician           | 41758  | 100.0                                     | 18.5                               | 9.1                                  | 75.1                                                      |
|                                    | All prescribers     | 226204 | 100.0                                     | 100                                | 11.3                                 | 78.0                                                      |

## DISCUSSION

In this nationwide population-based cohort study we found that the most prescribed and dispensed hormonal contraceptives during the study period were COC containing ethinylestradiol + levonorgestrel, desogestrel-only and COC with ethinylestradiol + drospirenone. Women who received an initial prescription of ethinylestradiol combined with either levonorgestrel or drospirenone were more prone to continue with the same drug. On the contrary, women who received desogestrel-only as the initial prescribed and dispensed hormonal contraceptive had 35 % higher probability to choose another type of contraceptive within 6 months of use. Women who originally had received ethinylestradiol + drospirenone were the least likely to switch contraceptive drug during the same period of time.

The Swedish Medical Products Agency (MPA) recommends levonorgestrel containing combined pills as the first choice when prescribing oral contraceptives. Our results show that prescribers most often follow these recommendations. But, the prescription pattern in Sweden differs from most other countries as desogestrel-only pills have a high market share of approximately 25% (13) compared to 4,5% in Denmark and 0.3% in the United States (14, 15).

The clinical implications of our findings are important as side effects or other reasons for discontinuation or switching between different contraceptives increase the risk for unwanted pregnancies. Oral desogestrel-only contraceptives have become a common choice due to fear of the increased risk for venous thromboses in both women who use combined hormonal contraception and prescribers who use combined hormonal contraception. However, an irregular bleeding pattern which is more frequent among users of progestin-only formulations might be a reason for the higher percentage of switchers or discontinuation in this group. Therefore, when prescribing hormonal contraceptives it is necessary to thoroughly evaluate each woman's individual risk for venous thrombosis and also provide a balanced and knowledge based information on the size of these risks.

COCs are associated with a number of positive health effects, for example decreased menstrual blood loss and improvement in dysmenorrhoea and acne. It has previously been demonstrated that positive health effects in addition to the contraceptive effect most likely will increase continuation rates (16). This may very well contribute to the fact that women on COCs were more prone to continue use of the initial prescribed product as compared with women using POP, although the vast majority of women are prescribed COCs for contraception and not primarily for medical reasons.

We found that among midwives desogestrel-only was the second most common prescribed hormonal contraceptive. At the same time and especially among the youngest group of women, 16 – 19 years, the percentage of switchers was the highest.

Formatted: Left: 0.55", Right: 0.55", Top: 0.98", Bottom: 0.98", Width: 8.26", Height: 11.69"

1  
2  
3  
4  
5  
6  
7  
8 Cerazette® (desogestrel 75µg) was registered in Sweden 2001 and the number of users, especially in the  
9 younger age categories increased rapidly during the following years. During the same time, the number of  
10 teenage abortions increased (176) and it can be speculated that the problem with bleeding control  
11 associated with progestin-only methods have ~~leadled~~ to lower continuation rates poorer compliance in this  
12 group of users and as a consequence an increased risk of unprotected intercourse leading to unwanted  
13 pregnancies.  
14

15  
16 During the past five years there has been an intense debate concerning a possible difference in the  
17 thromboembolic risk between COC containing levonorgestrel- and drospirenone. Retrospective studies  
18 have found an increased risk in women using ethinylestradiol + drospirenone compared with  
19 ethinylestradiol + levonorgestrel (187-210). However these results have been contradicted by results from  
20 prospective studies (212-254). When transforming results from this kind of studies into clinical  
21 recommendations, the question of continuation/discontinuation adherence and compliance is crucial. A  
22 possible small increase in risk may be balanced by higher continuation rates a better adherence to  
23 treatment. The results from the present study indicate a more favourable profile for COC containing  
24 drospirenone when it comes to -continuation rates adherence and compliance. To our best knowledge this  
25 has not previously been shown. A possible more favourable thromboembolic risk profile with a COC  
26 containing ethinylestradiol + levonorgestrel may be counteracted by alower continuation rates poorer  
27 adherence compared with pills containing drospirenone and a possible increased risk of unintended  
28 pregnancies. As the risk of venous thromboembolism increases rapidly already during early pregnancy this  
29 must be taken into account.  
30

31  
32  
33  
34  
35  
36 A substantial number of women had no second dispensation in six months of any contraceptive product  
37 (table 1). The design of the present study does not provide any information on this group and we cannot  
38 draw any conclusions. We can, however, speculate that most probably the group is a mix of women  
39 stopping contraceptive use and women switching to a non-hormonal contraceptive method. The use of  
40 copper-IUDs is widespread in Sweden and the register used in this study does not provide information on  
41 copper-IUD use as this is not a pharmaceutical product. As COC with ethinylestradiol + drospirenone is  
42 second-line treatment in Sweden, it seems reasonable that this group is bigger. The actual number of  
43 women who discontinued without switching to a non-hormonal method is unknown.  
44

45  
46  
47 Some of the women considered as first time users actually could have been using the same contraceptive  
48 before the period of the study. For various reasons these women may have stopped their use and later on  
49 started again. This would most likely occur in the older age groups. If so, these women would be expected  
50 to have higher continuation rates than the younger women. As this is not the case (table 1), we do not  
51 consider this as a major source of bias.  
52  
53  
54

### Strengths and limitations of the study

The Swedish Prescribed Drug Register covers all drugs dispensed from all Swedish pharmacies since July 2005. Since sale information is transferred directly from the cashier to the register, data is complete and results in a high external validity for the register.

A further strength is that the large amount of data gives a high precision to the point estimates. These factors are the usual strengths in register research together with avoidance of errors arising out of recall bias, which is a common problem arising when the data used have been collected from interviews and questionnaires.

We have not been able to control for a wish to become pregnant in this study. A lowered rate of “repeated prescription and dispensation identical to the first” may to some extent be an effect of plans to become pregnant. Therefore, the percentage rates for “repeated prescription and dispensation identical to the first” might be somewhat difficult to interpret. However, the RR estimates are useful since there is no reasonable explanation of the choice made by women to use desogestrel-only as an initial formulation to a greater extent because these women might be more prone to become pregnant.

### Conclusion

The three most common types of initially prescribed hormonal contraceptive in Sweden are from most to least common: ethinylestradiol + levonorgestrel (43.3 %), desogestrel-only (24.4 %) and ethinylestradiol + drospirenone (11.1 %). Of these drugs, desogestrel-only users were most likely to switch to another drug during the first six months with 14.3% changing. The RR for this type of change was 1.35, compared to ethinylestradiol + levonorgestrel. Women using drospirenone-containing COC were less likely to switch within six months than women using levonorgestrel-containing COC (RR 0.63; 0.59-0.66). The prescription pattern concerning the women’s continuation rates differed overall only slightly between the physicians’ and the midwives’, although there was a lowered prescription and dispensation rate of ethinylestradiol + drospirenone by midwives compared to physicians. These findings may be of clinical importance when tailoring hormonal contraceptives on an individual basis.



## REFERENCES

1. Trussell J. Understanding contraceptive failure. *Best Pract Res Clin Obstet Gynaecol* 2009;23:199-209.
2. Lindh I, Blohm F, Andersson-Ellström E, Milsom I. Contraceptive use and pregnancy outcome in three generations of Swedish female teenagers from the same urban population. *Contraception* 2009;80: 163–169.
3. [Larsson M](#), [Tydén T](#), [Hanson U](#), [Häggström-Nordin E](#) Contraceptive use and associated factors among Swedish high school students. *Eur J Contracept Reprod Health Care* 2007;12:119-24.
4. [Lawrie TA](#), [Helmerhorst FM](#), [Maitra NK](#), [Kulier R](#), [Bloemenkamp K](#), [Gülmezoglu AM](#). Types of progestogens in combined oral contraception: effectiveness and side-effects. *Cochrane Database Syst Rev* 2011;11:CD004861.
5. [Maitra N](#), [Kulier R](#), [Bloemenkamp KW](#), [Helmerhorst FM](#), [Gülmezoglu AM](#). Progestogens in combined oral contraceptives for contraception. *Cochrane Database Syst Rev*. 2004;3:CD004861. Update in *Cochrane Database Syst Rev* 011;5:CD004861.
6. [Foster DG](#), [Parvataneni R](#), [de Bocanegra HT](#), [Lewis C](#), [Bradsberry M](#), [Darney P](#). Number of oral contraceptive pill packages dispensed, method continuation, and costs. *Obstet Gynecol* 2006;108:1107-14.
7. [Potter JE](#), [McKinnon S](#), [Hopkins K](#), [Amastae I](#), [Shedlin MG](#), [Powers DA](#), [Grossman D](#). Continuation of prescribed compared with over-the-counter oral contraceptives. *Obstet Gynecol* 2011;117:551-7.
8. [Sucato GS](#), [Land SR](#), [Murray PI](#), [Cecchini R](#), [Gold MA](#). Adolescents' experiences using the contraceptive patch versus pills. *J Pediatr Adolesc Gynecol* 2011;24:197-203.
9. [Murphy PA](#), [Brixner D](#). Hormonal contraceptive discontinuation patterns according to formulation: investigation of associations in an administrative claims database. *Contraception* 2008;77:257-63
10. [Van Vliet HA](#), [Grimes DA](#), [Lopez LM](#), [Schulz KF](#), [Helmerhorst FM](#). Triphasic versus monophasic oral contraceptives for contraception. *Cochrane Database Syst Rev* 2011; 9;:CD003553.
11. Wettermark B, Hammar N, Fored CM, Leimanis A, Otterblad Olausson P, Bergman U, Persson I, Sundström A, Westerholm B, Rosén M. The new Swedish Prescribed Drug Register-opportunities for pharmacoepidemiological research and experience from the first six months. *Pharmacoepidemiol Drug Saf* 2007;16:726-35.

Formatted: English (U.K.)

Formatted: English (U.K.)

Field Code Changed

Formatted: Swedish (Sweden)

Formatted: Swedish (Sweden)

Formatted: Swedish (Sweden)

Field Code Changed

Formatted: Swedish (Sweden)

Formatted: Swedish (Sweden)

Field Code Changed

Formatted: Swedish (Sweden)

Formatted: Swedish (Sweden)

Field Code Changed

Formatted: Swedish (Sweden)

Formatted: Swedish (Sweden)

Formatted: Swedish (Sweden)

Field Code Changed

Formatted: Swedish (Sweden)

Formatted: Swedish (Sweden)

Field Code Changed

1  
2  
3  
4  
5  
6  
7  
8  
9  
10  
11  
12  
13  
14  
15  
16  
17  
18  
19  
20  
21  
22  
23  
24  
25  
26  
27  
28  
29  
30  
31  
32  
33  
34  
35  
36  
37  
38  
39  
40  
41  
42  
43  
44  
45  
46  
47  
48  
49  
50  
51  
52  
53  
54  
55  
56  
57  
58  
59  
60

12. Kirkwood BR, Sterne JAC, Essential Medical Statistics. Second ed. *Blackwell Science Ltd, Oxford*, 2003.

13. Swedish National Board of Health and Welfare; <http://www.socialstyrelsen.se/statistik/statistikdatabas>. Retrieved December 2012

14. Wilson NM, Laursen M, Lidegaard Ø. [Oral contraception in Denmark 1998-2010](#). *Acta Obstet Gynecol Scand*. 2012;91:810-5.

15. Hall KS, Trussell J, Schwarz EB. Progestin-only contraceptive pill use among women in the United States. *Contraception* 2012;86:653-8

~~16.~~ Swedish National Board of Health and Welfare; <http://www.socialstyrelsen.se/statistik/statistikefteramne/aborter>. Retrieved November 2012

~~17.~~ Robinson JC, Plichta S, Weisman CS, Nathanson CA, Ensminger M. Dysmenorrhea and use of oral contraceptives in adolescent women attending a family planning clinic. *Am J Obstet Gynecol*. 1992 Feb;166(2):578-83

~~16.~~

~~17-18.~~ Lidegaard O, Nielsen LH, Skovlund CW, Løkkegaard E. Venous thrombosis in users of non-hormonal contraception: follow-up study, Denmark 2001-10. *BMJ* 2012;344:e2990.

~~18-19.~~ Jick SS, Hernandez RK. [Risk of non-fatal venous thromboembolism in women using oral contraceptives containing drospirenone compared with women using oral contraceptives containing levonorgestrel: case-control study using United States claims data](#). *BMJ* 2011;342:d2151. doi: 10.1136/bmj.d2151

~~19-20.~~ Parkin L, Sharples K, Hernandez RK, Jick SS. Risk of venous thromboembolism in users of oral contraceptives containing drospirenone or levonorgestrel: nested case-control study based on UK General Practice Research Database. *BMJ* 2011;342:d2139. doi: 10.1136/bmj.d2139.

~~20-21.~~ Lidegaard Ø, Milsom I, Geirsson RT, Skjeldstad FE. Hormonal contraception and venous thromboembolism. *Acta Obstet Gynecol Scand* 2012;9:769-78.

~~21-22.~~ Dinger IC, Heinemann LA, Kühl-Habich D. The safety of a drospirenone-containing oral contraceptive: final results from the European Active Surveillance Study on oral contraceptives based on 142,475 women-years of observation. *Contraception* 2007;75:344-54.

Field Code Changed

Field Code Changed

Formatted: Space After: 0 pt, Pattern: Clear (White)

Formatted: Indent: Left: 0.5", No bullets or numbering

Field Code Changed

1  
2  
3  
4  
5  
6  
7  
8  
9  
10  
11  
12  
13  
14  
15  
16  
17  
18  
19  
20  
21  
22  
23  
24  
25  
26  
27  
28  
29  
30  
31  
32  
33  
34  
35  
36  
37  
38  
39  
40  
41  
42  
43  
44  
45  
46  
47  
48  
49  
50  
51  
52  
53  
54  
55  
56  
57  
58  
59  
60

~~22-23.~~ Dinger J, [Assmann A](#), [Möhner S](#), [Minh TD](#). Risk of venous thromboembolism and the use of dienogest- and drospirenone-containing oral contraceptives: results from a German case-control study. *J Fam Plann Reprod Health Care* 2010;36:123-9.

~~23-24.~~ [Shapiro S](#), Dinger J. Risk of venous thromboembolism among users of oral contraceptives: a review of two recently published studies. *J Fam Plann Reprod Health Care* 2010;36:33-8.

~~24-25.~~ Dinger J, [Shapiro S](#). Combined oral contraceptives, venous thromboembolism, and the problem of interpreting large but incomplete datasets. *J Fam Plann Reprod Health Care* 2012;38:2-6

For peer review only

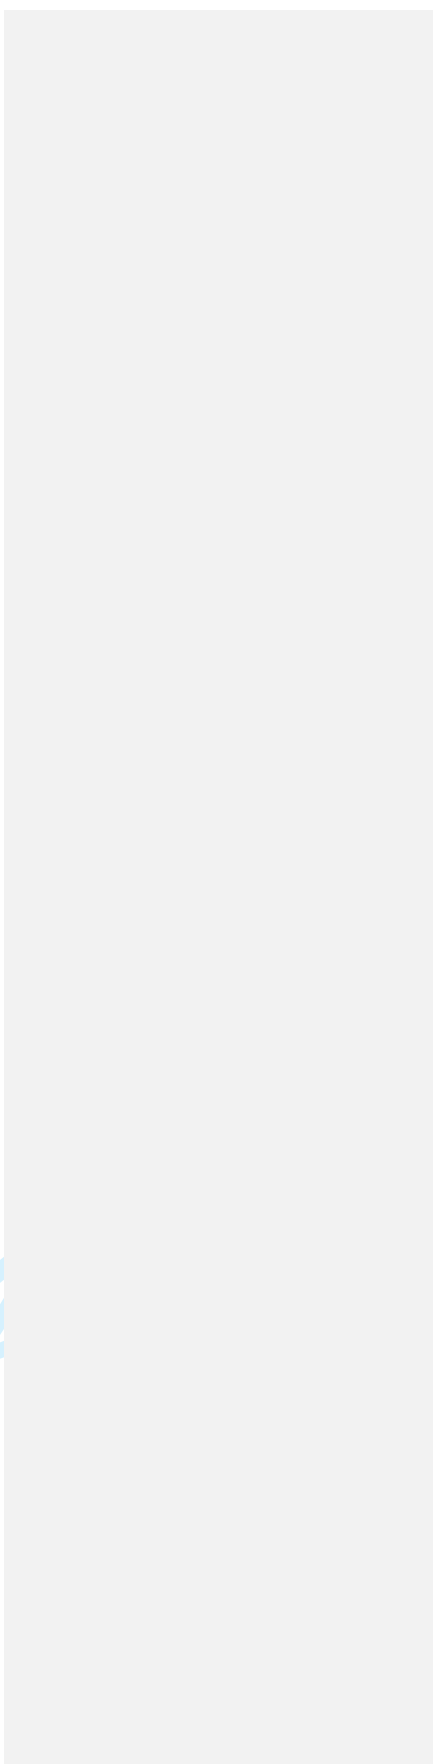

## CONTRIBUTORS

AJ and JB planned the study, supervised the analysis, interpreted the results, and wrote the manuscript. AJ is guarantor of the study.

ABW planned the study, prepared all data from the Swedish Prescribed Drug Register, made the statistical analyses and interpreted the results.

ML and AF interpreted the results, and revised the manuscript.

All authors discussed and approved the final manuscript.

AJ and JB decided when and where to attempt publication.

**Funding:** The expenses were covered by the County Council of Östergötland, Sweden.

**Competing interests:** All authors have completed the ICMJE uniform disclosure form at [www.icmje.org/coi\\_disclosure.pdf](http://www.icmje.org/coi_disclosure.pdf) (available on request from the corresponding author) and declare: no support from any organisation for the submitted work.

JB report financial relations to MSD Sweden and Bayer AB, Sweden (see attached declaration). The other investigators declared no financial relationships with any organisations that might have an interest in the submitted work in the previous three years, and no other relationships or activities that could appear to have influenced the submitted work.

**Ethical approval:** This study was approved by the Regional Ethical Review Board, Linköping, Sweden (Dnr M125-08).

**Data sharing:** No additional data available.

1  
2  
3  
4  
5  
6  
7  
8 **What is already known on this topic**

9  
10 Compliance and adherence to contraceptive use is almost always overestimated in clinical trials. Data on  
11 difference in compliance and adherence between different formulations of oral contraception is lacking or  
12 of poor quality. Knowledge of adherence and compliance is essential when it comes to avoid unintended  
13 pregnancies.  
14

15  
16 **What this study adds**

17  
18 Users of progestin-only pills more frequently choose another hormonal contraceptive method or  
19 discontinue use within six months. Users of drospirenone containing combined oral contraceptives were  
20 the least likely to switch method. The results indicate a more favourable profile concerning adherence to  
21 treatment for drospirenone containing combined oral contraceptives. This may be of clinical interest when  
22 it comes to a decision of what type of oral contraceptives the individual woman should be recommended.  
23  
24  
25  
26  
27  
28  
29  
30  
31  
32  
33  
34  
35  
36  
37  
38  
39  
40  
41  
42  
43  
44  
45  
46  
47  
48  
49  
50  
51  
52  
53  
54  
55  
56  
57  
58  
59  
60
